# Supplementary material for: Effectiveness and cost-effectiveness of a virtual community of practice to improve the empowerment of patients with ischaemic heart disease: study protocol of a randomised controlled trial
Source: PubMed Central journal article supplement — BMJ Open. 2020 Oct 12;10(10):e037374. doi: 10.1136/bmjopen-2020-037374 (PMC7552830; doi:10.1136/bmjopen-2020-037374), 2020-10-12
Supplement: bmjopen-2020-037374.draft_revisions.pdf [file bmjopen-2020-037374.draft_revisions.pdf]

# BMJ Open

BMJ Open is committed to open peer review. As part of this commitment we make the peer review history of every article we publish publicly available.

When an article is published we post the peer reviewers' comments and the authors' responses online. We also post the versions of the paper that were used during peer review. These are the versions that the peer review comments apply to.

The versions of the paper that follow are the versions that were submitted during the peer review process. They are not the versions of record or the final published versions. They should not be cited or distributed as the published version of this manuscript.

BMJ Open is an open access journal and the full, final, typeset and author-corrected version of record of the manuscript is available on our site with no access controls, subscription charges or pay-per-view fees (<http://bmjopen.bmj.com>).

If you have any questions on BMJ Open's open peer review process please email [info.bmjopen@bmj.com](mailto:info.bmjopen@bmj.com)

# BMJ Open

## Effectiveness and cost-effectiveness of a virtual intervention (VCoP) to improve the empowerment of patients with ischaemic heart disease: study protocol of a randomized controlled trial.

|                               |                                                                                                                                                                                                                                                                                                                                                                                                                                                                                                                                                                                                                                                                                                                                                                                                                                                                                                                                                                                                                                                                                                                                                                                                                                                                                                                                                                                                                                                                                                                                                                                                                                                                                                                                                                                                                                                                                                                                                                                                                                                                                                                                                                                                                                                  |
|-------------------------------|--------------------------------------------------------------------------------------------------------------------------------------------------------------------------------------------------------------------------------------------------------------------------------------------------------------------------------------------------------------------------------------------------------------------------------------------------------------------------------------------------------------------------------------------------------------------------------------------------------------------------------------------------------------------------------------------------------------------------------------------------------------------------------------------------------------------------------------------------------------------------------------------------------------------------------------------------------------------------------------------------------------------------------------------------------------------------------------------------------------------------------------------------------------------------------------------------------------------------------------------------------------------------------------------------------------------------------------------------------------------------------------------------------------------------------------------------------------------------------------------------------------------------------------------------------------------------------------------------------------------------------------------------------------------------------------------------------------------------------------------------------------------------------------------------------------------------------------------------------------------------------------------------------------------------------------------------------------------------------------------------------------------------------------------------------------------------------------------------------------------------------------------------------------------------------------------------------------------------------------------------|
| Journal:                      | <i>BMJ Open</i>                                                                                                                                                                                                                                                                                                                                                                                                                                                                                                                                                                                                                                                                                                                                                                                                                                                                                                                                                                                                                                                                                                                                                                                                                                                                                                                                                                                                                                                                                                                                                                                                                                                                                                                                                                                                                                                                                                                                                                                                                                                                                                                                                                                                                                  |
| Manuscript ID                 | bmjopen-2020-037374                                                                                                                                                                                                                                                                                                                                                                                                                                                                                                                                                                                                                                                                                                                                                                                                                                                                                                                                                                                                                                                                                                                                                                                                                                                                                                                                                                                                                                                                                                                                                                                                                                                                                                                                                                                                                                                                                                                                                                                                                                                                                                                                                                                                                              |
| Article Type:                 | Protocol                                                                                                                                                                                                                                                                                                                                                                                                                                                                                                                                                                                                                                                                                                                                                                                                                                                                                                                                                                                                                                                                                                                                                                                                                                                                                                                                                                                                                                                                                                                                                                                                                                                                                                                                                                                                                                                                                                                                                                                                                                                                                                                                                                                                                                         |
| Date Submitted by the Author: | 04-Feb-2020                                                                                                                                                                                                                                                                                                                                                                                                                                                                                                                                                                                                                                                                                                                                                                                                                                                                                                                                                                                                                                                                                                                                                                                                                                                                                                                                                                                                                                                                                                                                                                                                                                                                                                                                                                                                                                                                                                                                                                                                                                                                                                                                                                                                                                      |
| Complete List of Authors:     | <p>GONZALEZ-GONZALEZ, ANA; Goethe-Universitat Frankfurt am Main Institut fur Allgemeinmedizin; Gerencia Asistencial de Atención Primaria, Servicio Madrileño de Madrid, Red de Investigación en Servicios de Salud en Enfermedades Crónicas (REDISSEC)</p> <p>Perestelo-Pérez, Lilisbeth; Servicio de Evaluación y Planificación del Servicio Canario de la Salud; Red de Investigación en Servicios de Salud en Enfermedades Crónicas (REDISSEC)</p> <p>Koatz, Débora; Avedis Donabedian Research Institute (FAD); Red de Investigación en Servicios de Salud en Enfermedades Crónicas (REDISSEC)</p> <p>Ballester, Marta; Avedis Donabedian Research Institute; Red de Investigación en Servicios de Salud en Enfermedades Crónicas (REDISSEC),</p> <p>Pacheco-Huergo, Valeria; Centro de Atención Primaria Turó, Instituto Catalán de la Salud; Avedis Donabedian Research Institute (FAD)</p> <p>Ramos-García, Vanesa; Fundación Canaria Instituto de Investigación Sanitaria de Canarias (FISC)</p> <p>Torres-Castaño, Alezandra; Fundación Canaria Instituto de Investigación Sanitaria de Canarias (FISC)</p> <p>Rivero-Santana, Amado ; Servicio de Evaluación y Planificación del Servicio Canario de la Salud; Red de Investigación en Servicios de Salud en Enfermedades Crónicas (REDISSEC)</p> <p>Toledo-Chávarri, Ana; Fundación Canaria Instituto de Investigación Sanitaria de Canarias (FISC); Red de Investigación en Servicios de Salud en Enfermedades Crónicas (REDISSEC)</p> <p>Valcárcel-Nazco, Cristina; Fundación Canaria Instituto de Investigación Sanitaria de Canarias (FISC)</p> <p>Mateos-Rodilla, Juana; Escuela Madrileña de Salud, Dirección General de Humanización y Atención al Paciente</p> <p>Obaya-Rebollar, Juan; Centro de Salud Chopera, Gerencia Asistencial de Atención Primaria</p> <p>García-García, Javier; Unidad de Calidad y Seguridad del Paciente. Hospital Universitario Nuestra Señora de Candelaria</p> <p>Díaz-Sánchez, Santiago; Centro de Salud Pintores, Gerencia Asistencial de Atención Primaria</p> <p>Morales-Cobos, Luis; Centro de Salud Las Américas, Gerencia Asistencial de Atención Primaria</p> <p>Bosch-Fontcuberta, Josep; Instituto Catalán de la Salud, Centro de</p> |

|           |                                                                                                                                                                                                                                                                                                                                                                                                                                                                                                                                                                                                                                                                                                                                                                                                                                                                                                                                                                                                                                                                                            |
|-----------|--------------------------------------------------------------------------------------------------------------------------------------------------------------------------------------------------------------------------------------------------------------------------------------------------------------------------------------------------------------------------------------------------------------------------------------------------------------------------------------------------------------------------------------------------------------------------------------------------------------------------------------------------------------------------------------------------------------------------------------------------------------------------------------------------------------------------------------------------------------------------------------------------------------------------------------------------------------------------------------------------------------------------------------------------------------------------------------------|
|           | <p>Atención Primaria Encants; Universitat Autònoma de Barcelona, Departament de Medicina Àrea de Medicina Vallejo-Camazón, Nuria; Hospital Germans Trias i Pujol Rodríguez-Almodovar, Ana; UGC Cardiología, Hospital Universitario Reina Sofía del Castillo, José; Hospital San Juan de Dios, Cardiovascular Area Muñoz-Balsa, Marcos; Unidad de Apoyo Técnico, Gerencia Asistencial Atención Primaria, Servicio Madrileño de Salud del Rey-Granado, Yolanda; Unidad de Apoyo Técnico, Gerencia Asistencial Atención Primaria, Servicio Madrileño de Salud Garrido-Elustondo, Sofía; Comunidad de Madrid Consejería de Sanidad, Centre Family and Community Care Teaching Multiprofessional Unit Tello-Bernabé, María-Eugenia; Centro de Salud El Naranjo, Gerencia Asistencial Atención Primaria, Servicio Madrileño de Salud Ramírez-Puerta, Ana; Unidad de Apoyo Técnico, Gerencia Asistencial Atención Primaria, Servicio Madrileño de Salud Orrego, Carola; Avedis Donabedian Research Institute; Red de Investigación en Servicios de Salud en Enfermedades Crónicas (REDISSEC),</p> |
| Keywords: | Coronary heart disease < CARDIOLOGY, GENERAL MEDICINE (see Internal Medicine), GERIATRIC MEDICINE                                                                                                                                                                                                                                                                                                                                                                                                                                                                                                                                                                                                                                                                                                                                                                                                                                                                                                                                                                                          |
|           |                                                                                                                                                                                                                                                                                                                                                                                                                                                                                                                                                                                                                                                                                                                                                                                                                                                                                                                                                                                                                                                                                            |

SCHOLARONE™  
Manuscripts

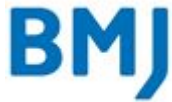

I, the Submitting Author has the right to grant and does grant on behalf of all authors of the Work (as defined in the below author licence), an exclusive licence and/or a non-exclusive licence for contributions from authors who are: i) UK Crown employees; ii) where BMJ has agreed a CC-BY licence shall apply, and/or iii) in accordance with the terms applicable for US Federal Government officers or employees acting as part of their official duties; on a worldwide, perpetual, irrevocable, royalty-free basis to BMJ Publishing Group Ltd ("BMJ") its licensees and where the relevant Journal is co-owned by BMJ to the co-owners of the Journal, to publish the Work in this journal and any other BMJ products and to exploit all rights, as set out in our [licence](#).

The Submitting Author accepts and understands that any supply made under these terms is made by BMJ to the Submitting Author unless you are acting as an employee on behalf of your employer or a postgraduate student of an affiliated institution which is paying any applicable article publishing charge ("APC") for Open Access articles. Where the Submitting Author wishes to make the Work available on an Open Access basis (and intends to pay the relevant APC), the terms of reuse of such Open Access shall be governed by a Creative Commons licence – details of these licences and which [Creative Commons](#) licence will apply to this Work are set out in our licence referred to above.

Other than as permitted in any relevant BMJ Author's Self Archiving Policies, I confirm this Work has not been accepted for publication elsewhere, is not being considered for publication elsewhere and does not duplicate material already published. I confirm all authors consent to publication of this Work and authorise the granting of this licence.

1  
2  
3 1 **TITLE**  
4

5 2 Effectiveness and cost-effectiveness of a virtual intervention (VCoP) to improve the empowerment  
6  
7 3 of patients with ischaemic heart disease: study protocol of a randomized controlled trial.  
8  
9

10 4  
11  
12 5 **AUTHORS**  
13

14 6 Ana Isabel González-González

15  
16 7 Institute of General Practice, Johann Wolfgang Goethe University, Frankfurt / Main, GERMANY.

17  
18 8 Gerencia Asistencial Atención Primaria, Servicio Madrileño de Salud, Madrid, SPAIN

19  
20 9 Red de Investigación en Servicios de Salud en Enfermedades Crónicas (REDISSEC), Madrid, SPAIN.

21  
22 10 Email: [GonzalezGonzalez@allgemeinmedizin.uni-frankfurt.de](mailto:GonzalezGonzalez@allgemeinmedizin.uni-frankfurt.de)  
23  
24  
25

26 11  
27  
28 12 Lilisbeth Perestelo-Pérez

29  
30 13 Servicio de Evaluación y Planificación del Servicio Canario de la Salud, Tenerife, SPAIN

31  
32 14 Red de Investigación en Servicios de Salud en Enfermedades Crónicas (REDISSEC), Madrid, SPAIN.

33  
34 15 Email: [lilisbeth.peresteloperez@sescs.es](mailto:lilisbeth.peresteloperez@sescs.es)  
35  
36

37 16  
38  
39 17 Débora Koatz

40  
41 18 Avedis Donabedian Research Institute (FAD), Barcelona, SPAIN

42  
43 19 Universitat Autònoma de Barcelona, Barcelona, SPAIN

44  
45 20 Red de Investigación en Servicios de Salud en Enfermedades Crónicas (REDISSEC), Madrid, SPAIN.

46  
47 21 Email: [dkoatz@fadq.org](mailto:dkoatz@fadq.org)  
48  
49

50 22  
51  
52 23 Marta Ballester

53  
54 24 Avedis Donabedian Research Institute (FAD), Barcelona, SPAIN

55  
56 25 Universitat Autònoma de Barcelona, Barcelona, SPAIN

57  
58 26 Red de Investigación en Servicios de Salud en Enfermedades Crónicas (REDISSEC), Madrid, SPAIN.  
59  
60

1  
2  
3 27 Email: [mballester@fadq.org](mailto:mballester@fadq.org)  
4

5 28  
6

7 29 Valeria Pacheco-Huergo  
8

9 30 Centro de Atención Primaria Turó, Instituto Catalán de la Salud, Barcelona, SPAIN  
10

11 31 Avedis Donabedian Research Institute (FAD), Barcelona, SPAIN  
12

13 32 Email: [vpachecohuergo@gmail.com](mailto:vpachecohuergo@gmail.com)  
14  
15

16 33  
17

18 34 Vanesa Ramos-García  
19

20 35 Fundación Canaria Instituto de Investigación Sanitaria de Canarias (FISC), Tenerife, SPAIN  
21

22 36 Email: [vanesa.ramosgarcia@sescs.es](mailto:vanesa.ramosgarcia@sescs.es)  
23  
24

25 37  
26

27 38 Alezandra Torres-Castaño  
28

29 39 Fundación Canaria Instituto de Investigación Sanitaria de Canarias (FISC), Tenerife, SPAIN  
30

31 40 Email: [atorrcas@sescs.es](mailto:atorrcas@sescs.es)  
32  
33

34 41  
35

36 42 Amado Rivero-Santana  
37

38 43 Servicio de Evaluación y Planificación del Servicio Canario de la Salud, Tenerife, SPAIN  
39

40 44 Red de Investigación en Servicios de Salud en Enfermedades Crónicas (REDISSEC), Madrid, SPAIN  
41

42 45 Email: [amado.riverosantana@sescs.es](mailto:amado.riverosantana@sescs.es)  
43  
44

45 46  
46

47 47 Ana Toledo-Chavarri  
48

49 48 Fundación Canaria Instituto de Investigación Sanitaria de Canarias (FISC), Tenerife, SPAIN  
50

51 49 Red de Investigación en Servicios de Salud en Enfermedades Crónicas (REDISSEC), Madrid, SPAIN  
52

53 50 Email: [anatoledochavarri@sescs.es](mailto:anatoledochavarri@sescs.es)  
54  
55

56 51  
57

58 52 Cristina Valcarcel Nazco  
59  
60

- 1  
2  
3 53 Fundación Canaria Instituto de Investigación Sanitaria de Canarias (FISC), Tenerife, SPAIN  
4  
5 54 Email: [cristina.valcarcelnazco@sescs.es](mailto:cristina.valcarcelnazco@sescs.es)  
6  
7 55  
8  
9 56 Juana Mateos-Rodilla  
10  
11 57 Escuela Madrileña de Salud, Dirección General de Humanización y Atención al Paciente, Madrid,  
12  
13 58 SPAIN  
14  
15 59 Email: [juana.mateos@salud.madrid.org](mailto:juana.mateos@salud.madrid.org)  
16  
17 60  
18  
19 61 Juan Carlos Obaya-Rebollar  
20  
21 62 Centro de Salud Chopera, Gerencia Asistencial de Atención Primaria, Madrid, SPAIN  
22  
23 63 Email: [juancarlos.obaya@salud.madrid.org](mailto:juancarlos.obaya@salud.madrid.org)  
24  
25 64  
26  
27 65 Javier García-García  
28  
29 66 Unidad de Calidad y Seguridad del Paciente. Hospital Universitario Nuestra Señora de Candelaria,  
30  
31 67 Tenerife, Canarias, SPAIN  
32  
33 68 Email: [chaviergg@gmail.com](mailto:chaviergg@gmail.com)  
34  
35 69  
36  
37 70 Santiago Díaz-Sánchez  
38  
39 71 Centro de Salud Pintores, Gerencia Asistencial de Atención Primaria, Madrid, SPAIN  
40  
41 72 Email: [sdiazs@salud.madrid.org](mailto:sdiazs@salud.madrid.org)  
42  
43 73  
44  
45 74 Luis Morales-Cobos  
46  
47 75 Centro de Salud Las Américas, Gerencia Asistencial de Atención Primaria, Madrid, SPAIN  
48  
49 76 Email: [luis.morales@salud.madrid.org](mailto:luis.morales@salud.madrid.org)  
50  
51 77  
52  
53 78 Josep-María Bosch-Fontcuberta  
54  
55  
56  
57  
58  
59  
60

- 1  
2  
3 79 Centro de Atención Primaria Encants, Instituto Catalán de la Salud, Barcelona, SPAIN  
4  
5 80 Departament de Medicina Area de Medicina, Universitat Autònoma de Barcelona, SPAIN  
6  
7 81 Email: [boschfontcuberta@gmail.com](mailto:boschfontcuberta@gmail.com)  
8  
9 82  
10  
11 83 Nuria Vallejo-Camazón  
12  
13 84 Hospital Germans Trias i Pujol, Badalona, SPAINol  
14  
15 85 Email: [nvallejo73@hotmail.com](mailto:nvallejo73@hotmail.com)  
16  
17 86  
18  
19 87 Ana Rodríguez-Almodóvar  
20  
21 88 UGC Cardiología, Hospital Universitario Reina Sofía, Córdoba, SPAIN  
22  
23 89 Email: [anarodriguezal@yahoo.es](mailto:anarodriguezal@yahoo.es)  
24  
25 90  
26  
27 91 José Carlos del Castillo  
28  
29 92 Área de prevención y medicina cardiovascular. Hospital San Juan de Dios, Tenerife, SPAIN  
30  
31 93 Email: [jcasrodc@gmail.com](mailto:jcasrodc@gmail.com)  
32  
33 94  
34  
35 95 Marcos Muñoz-Balsa  
36  
37 96 Unidad de Apoyo Técnico, Gerencia Asistencial Atención Primaria, Servicio Madrileño de Salud,  
38  
39 97 Madrid, SPAIN  
40  
41 98 Email: [marcosjose.munoz@salud.madrid.org](mailto:marcosjose.munoz@salud.madrid.org)  
42  
43 99  
44  
45 100 Yolanda del Rey-Granado  
46  
47 101 Unidad de Apoyo Técnico, Gerencia Asistencial Atención Primaria, Servicio Madrileño de Salud,  
48  
49 102 Madrid, SPAIN  
50  
51 103 [yolandadel.rey@salud.madrid.org](mailto:yolandadel.rey@salud.madrid.org)  
52  
53 104  
54  
55  
56  
57  
58  
59  
60



- 1  
2  
3 105 Sofia Garrido-Elustondo  
4  
5 106 Unidad Docente Multiprofesional de Atención Familiar y Comunitaria Sureste, Unidad de Apoyo a la  
6  
7 107 Investigación, Gerencia Asistencial Atención Primaria, Servicio Madrileño de Salud, Madrid, SPAIN  
8  
9 108 Red de Investigación en Servicios de Salud en Enfermedades Crónicas (REDISSEC), Madrid, SPAIN.  
10  
11  
12 109 Email: [sgarrido@salud.madrid.org](mailto:sgarrido@salud.madrid.org)  
13  
14 110  
15  
16 111 M<sup>a</sup> Eugenia Tello-Bernabé  
17  
18 112 Centro de Salud El Naranjo, Gerencia Asistencial Atención Primaria, Servicio Madrileño de Salud,  
19  
20 113 Madrid, SPAIN  
21  
22 114 Red de Investigación en Servicios de Salud en Enfermedades Crónicas (REDISSEC), Madrid, SPAIN.  
23  
24 115 Email: [mariaeugenia.tello@salud.madrid.org](mailto:mariaeugenia.tello@salud.madrid.org)  
25  
26 116  
27  
28 117 Ana Belén Ramírez-Puerta  
29  
30 118 Unidad de Apoyo Técnico, Gerencia Asistencial Atención Primaria, Servicio Madrileño de Salud,  
31  
32 119 Madrid, SPAIN  
33  
34 120 Email: [anabelen.ramirez@salud.madrid.org](mailto:anabelen.ramirez@salud.madrid.org)  
35  
36 121  
37  
38 122 Carola Orrego  
39  
40 123 Avedis Donabedian Research Institute (FAD), Barcelona, SPAIN  
41  
42 124 Universitat Autònoma de Barcelona, Barcelona, SPAIN  
43  
44 125 Red de Investigación en Servicios de Salud en Enfermedades Crónicas (REDISSEC), Madrid, SPAIN.  
45  
46 126 Email: [correge@fadq.org](mailto:correge@fadq.org)  
47  
48 127  
49  
50 128 **CORRESPONDING AUTHOR**  
51  
52 129 Ana Isabel González-González  
53  
54 130 Institute of General Practice, Johann Wolfgang Goethe University, Frankfurt / Main, GERMANY.  
55  
56  
57  
58  
59  
60

1  
2  
3 131 Email: GonzalezGonzalez@allgemeinmedizin.uni-frankfurt.de  
4  
5  
6  
7  
8  
9  
10  
11  
12  
13  
14  
15  
16  
17  
18  
19  
20  
21  
22  
23  
24  
25  
26  
27  
28  
29  
30  
31  
32  
33  
34  
35  
36  
37  
38  
39  
40  
41  
42  
43  
44  
45  
46  
47  
48  
49  
50  
51  
52  
53  
54  
55  
56  
57  
58  
59  
60

For peer review only

1  
2  
3 132 **ABSTRACT**

4  
5 133 **Introduction**

6  
7 134 Virtual Communities of Practice (VCoP) offer ubiquitous access to information and exchange  
8  
9  
10 135 possibilities for people in similar situations, which might be especially valuable for the self-  
11  
12 136 management of patients with chronic diseases. In view of the scarce evidence on the clinical and  
13  
14 137 economic impact of these interventions on chronic conditions, we aim to evaluate the  
15  
16 138 effectiveness and cost-effectiveness of a VCoP in the improvement of the activation and other  
17  
18 139 patient empowerment measures in patients with ischemic heart disease (IHD).

19  
20  
21 140 **Methods and analysis**

22  
23 141 A pragmatic randomised controlled trial will be performed in Catalonia, Madrid and Canary  
24  
25 142 Islands, Spain. Two hundred forty-six patients with a recent diagnosis of IHD attending the  
26  
27 143 participating centres will be selected and randomized to intervention or control group. The  
28  
29 144 intervention group will be offered participation for 12 months in a VCoP based on a gamified web  
30  
31 145 2.0 platform where there is interaction with other patients and a multidisciplinary professional  
32  
33 146 team. The control group will receive usual care. The primary outcome will be measured with the  
34  
35 147 Patient Activation Measure questionnaire at baseline, 6, 12 and 18 months. Secondary variables  
36  
37 148 will include: sociodemographic and clinical variables; knowledge test (Questionário de Fatores de  
38  
39 149 Risco Cardiovascular), attitudes (Self-efficacy Managing Chronic Disease Scale), adherence to  
40  
41 150 Mediterranean diet (Mediterranean Diet Questionnaire), level of physical activity (International  
42  
43 151 Physical Activity Questionnaire), depression (Patient Health Questionnaire), anxiety (Hospital  
44  
45 152 Anxiety Scale), medication adherence (Adherence to Refill and Medication Scale), quality of life  
46  
47 153 (EQ-5D-5L) and health resources use. Data will be collected from self-reported questionnaires and  
48  
49 154 electronic medical records.

50  
51  
52  
53  
54 155 **Ethics and dissemination**

55  
56 156 The trial was approved by Clinical Research Ethics Committee of Gregorio Marañón University  
57  
58 157 Hospital in Madrid, Nuestra Señora de Candelaria University Hospital in Santa Cruz de Tenerife and  
59  
60

1  
2  
3 158 IDIAP Jordi Gol in Barcelona. The results will be disseminated through workshops, policy briefs,  
4  
5 159 peer-reviewed publications, local/international conferences.  
6  
7 160 **Registration**  
8  
9 161 ClinicalTrials.gov Identifier: NCT03959631  
10  
11  
12  
13  
14  
15  
16  
17  
18  
19  
20  
21  
22  
23  
24  
25  
26  
27  
28  
29  
30  
31  
32  
33  
34  
35  
36  
37  
38  
39  
40  
41  
42  
43  
44  
45  
46  
47  
48  
49  
50  
51  
52  
53  
54  
55  
56  
57  
58  
59  
60

For peer review only

1  
2  
3 162 **Strengths and limitations of this study**  
4

- 5 163 - We will experimentally test an innovative learning intervention based on a VCoP for patient  
6  
7 164 empowerment, for which the literature lacks experimental evaluations.  
8  
9 165 - VCoP can enhance communication between CoP members in different geographic locations  
10  
11 and even from different time zones.  
12  
13 166  
14 167 - Participation rate can be low as similar experiences have shown; we will include the active role  
15  
16 168 of a community manager, weekly emails as reminders and a gamified competitive score  
17  
18 169 system to boost participation.  
19  
20 170 - Participation in the intervention group will require a minimum level of digital literacy so, the  
21  
22 171 results could not be generalized to all patients.  
23  
24 172 - Patients belonging to the control group and intervention group could receive different type of  
25  
26 173 self-management support depending on the centres where the care is provided.  
27  
28  
29  
30  
31  
32  
33  
34  
35  
36  
37  
38  
39  
40  
41  
42  
43  
44  
45  
46  
47  
48  
49  
50  
51  
52  
53  
54  
55  
56  
57  
58  
59  
60

## 174 INTRODUCTION

175 In Western countries, ischemic heart disease (IHD) is a major public concern as, and although  
176 mortality from IHD has been significantly reduced since 2000, it remains as a leading cause of  
177 death (50.6 deaths / 100,000 inhabitants in Spain and 106.6 deaths / 100,000 inhabitants in the  
178 United States in 2016) (1). In Spain 32,325 people died from IHD in 2017, according to the National  
179 Institute of Statistics (2). Patients with IHD may have a stable disease or an acute coronary  
180 syndrome, which could present with or without ST segment elevation. In addition, some patients  
181 may have left ventricular dysfunction and heart failure (3–5).

182 For the treatment of IHD, in addition to the pharmacological treatment and, if necessary,  
183 interventional procedures, it is essential to manage cardiovascular risk factors such as smoking  
184 cessation, blood pressure, lipids and diabetes control, adherence to a Mediterranean diet, active  
185 lifestyle and prevent obesity. Moreover, for the secondary prevention of IHD, cardiac  
186 rehabilitation programs are beneficial for patients, improving exercise capacity, quality of life and  
187 psychological well-being (6–8). The active role of the patient is crucial along with the support of  
188 health care providers to achieve a successful secondary prevention of IHD.

189 The empowerment and self-management of patients with chronic conditions is becoming one of  
190 the main objectives in health care, especially in primary care (PC). The European EMPATHiE project  
191 (9) defines the empowered patient as one who "has control over the management of the  
192 conditions of their daily life, actively tries to improve his/her quality of life and has the necessary  
193 knowledge, skills, attitudes and self-perception to adjust his/her behaviour and work in  
194 partnership with others when necessary, to achieve optimal well-being".

195 One of the domains included in patient empowerment is the level of patient activation. Patient  
196 activation incorporates a combination of knowledge about the illness, ability and self-confidence  
197 in the management of the medical conditions (10). It is associated with healthy behaviours, good  
198 chronic disease metrics, and reduced morbidity and unplanned hospitalizations (11–15).

1  
2  
3 199 Interventions aimed at empowerment are intended to provide patients (and their informal  
4  
5 200 caregivers, when appropriate) with the ability to participate in decisions related to their illness to  
6  
7 201 the extent they wish, develop self-confidence, self-esteem and skills to face the physical,  
8  
9 202 emotional and social impact of the disease in their daily lives (16,17).  
10  
11 203 Virtual Communities of Practice (VCoP) offer ubiquitous access to information and exchange  
12  
13 204 possibilities for people in similar situations, which is especially valuable in patients with chronic  
14  
15 205 diseases. A CoP is a group of individuals who participate in a common activity and experience and  
16  
17 206 create a shared identity and deepen their knowledge and experience in the area through a  
18  
19 207 continuous interaction that strengthens their relationships (18). In this context, a group of patients  
20  
21 208 with the same illness such as IHD, could benefit from an intervention of these characteristics  
22  
23 209 where they can share resources and information in addition to having the possibility of receiving  
24  
25 210 peer and professional support.  
26  
27 211 There is little research on the effect of VCoP in terms of their clinical and economic impact and on  
28  
29 212 the empowerment of patients with chronic diseases, especially with IHD (19,20). We propose to  
30  
31 213 address this gap and, thus, present the protocol of a randomized controlled trial, which mainly  
32  
33 214 aims to evaluate the effectiveness and cost-effectiveness of a VCoP to improve the activation and  
34  
35 215 other measures related with patient empowerment in patients with IHD.  
36  
37  
38  
39  
40  
41  
42

## 217 **METHODS AND ANALYSIS**

### 218 **Study design**

219 We plan a pragmatic randomized controlled multicentre trial (*e-mpodera*<sup>2</sup>), with two parallel arms  
220 and 18-month follow-up.

### 221 **Study setting**

222 Virtual setting for intervention arm. Usual care will be provided at primary care practices (PCPs)  
223 and outpatient specialized clinics in Catalonia, Madrid and Canary Islands in Spain.

### 224 **Eligibility criteria**

225 Patients with a recent diagnosis of IHD will be screened for the following eligibility criteria:

226 *Inclusion criteria*

227 Age  $\geq$  18 years; active diagnosis in the electronic medical record (EMR) of IHD (ICPC-2 codes K74-  
228 76; or ICD-9 codes 410, 411, 411.8, 413, 414 y 414.9) in the year prior to inclusion in the study;  
229 Internet at home or Smartphone; be able to follow the requirements of the study (e.g. digital  
230 literacy); have signed the informed consent (Additional file 1).

231 [About here link to Additional file 1 on Informed consent].

232 *Exclusion criteria*

233 Institutionalized, terminal illness, physical or mental disability that limit the ability to answer the  
234 questionnaires or when telephone / email contact is not available in the PCPs/hospitals'  
235 databases.

236 **Interventions**

237 *VCoP group*

238 "e-mpodera<sup>2</sup>" is a gamified VCoP on a web 2.0 platform based on the exchange of experiences and  
239 knowledge through participatory learning (21). It will provide educational, playful elements and  
240 tools that will facilitate the learning and transfer of knowledge and attitudes among patients with  
241 IHD and with health care professionals. The structure and components will be designed according  
242 to the needs and specifications of patients with IHD recruited in an earlier stage using a co-  
243 creation methodology with face-to-face sessions and virtual activities (forums and interactions)  
244 that incorporated a personalized itinerary – Patient Journey Map - (published elsewhere) and with  
245 the use of various types of content including readings, resources, videos, games and virtual  
246 sessions (21).

247 Patients will have access to multidisciplinary professional support as needed and according to  
248 what was identified in the content-design stage (published elsewhere) will potentially include  
249 general practitioners, cardiologists, psychologists, self-care and self-management specialists,  
250 nutritionist and others as necessary. Various thematic areas related to the empowerment of



1  
2  
3 251 patients and self-care of IHD will be progressively covered: health competence, self-efficacy and  
4  
5 252 activation improvement, behavioural changes, lifestyle / signs / symptoms monitoring, technical  
6  
7 253 skills, chronic disease acceptance and shared decision-making. Special emphasis will be given to  
8  
9 254 the changes recommended by European Guidelines (22) for self-management of IHD including  
10  
11 255 monitoring changes in symptoms, stress management, mental health and adherence to  
12  
13 256 medication, diet, exercise plans, sodium cholesterol, and alcohol restriction and tobacco  
14  
15 257 abstinence. The active role of a community manager, weekly emails as reminders and a gamified  
16  
17 258 competitive score system will boost participation.  
18  
19

20  
21 259 *Usual care group*

22  
23 260 Patients allocated to the control group will continue with their usual self- and professional care  
24  
25 261 according to the local guidelines (3–5).  
26

27 262 **Outcomes measures**

28  
29 263 *Primary outcome*

30  
31 264 The primary outcome will be the patient activation level using the Patient Activation Measure  
32  
33 265 (PAM) questionnaire that assesses activation in patients with chronic diseases (12). The  
34  
35 266 questionnaire consists of 13 items that assesses knowledge, skills and confidence of people for  
36  
37 267 self-care, measured by a Likert 1-4 scale with a total score between 0 and 100 (100 identifies the  
38  
39 268 patients with the highest level of activation). The Spanish translated version has been validated in  
40  
41 269 patients with chronic diseases and has demonstrated a similar behaviour to the original  
42  
43 270 instrument with good validity and reliability properties (23). It has been used in previous studies  
44  
45 271 by this research team (24).  
46  
47

48  
49 272 *Secondary outcomes*

50  
51 273 For the effectiveness of the VCoP, we will record the following secondary measures:

- 52  
53 274 - Clinical variables such as body mass index, lipid profile (HDL-C, LDL-C), smoking status, number  
54  
55 275 and frequency of angina episodes will be collected through researcher's developed online  
56  
57  
58  
59  
60

1  
2  
3 276 questionnaire that will be fulfilled by health care professionals combined with information  
4  
5 277 from the EMR.  
6  
7 278 - Knowledge about the disease will be assessed through a self-administered online  
8  
9 279 questionnaire based on the Questionário de Fatores de Risco Cardiovascular (Q-FARC) (25–27),  
10  
11 280 previously translated from the English version and adapted to the Spanish population.  
12  
13 281 - Patients' attitudes to self-care will be evaluated using the self-administered Self-efficacy  
14  
15 282 Managing Chronic Disease Scale (SMCDS) (28), translated into Spanish (29) and used in  
16  
17 283 patients with heart failure (30).  
18  
19 284 - Adherence to Mediterranean diet will be assessed with the Mediterranean Diet questionnaire  
20  
21 285 (31), validated in the Spanish population in the PREDIMED study (32–34).  
22  
23 286 - Physical activity will be measured using the International Physical Activity Questionnaire  
24  
25 287 (IPAQ), translated and adapted to the Spanish language (35). Patients will be classified into  
26  
27 288 three categories (low, medium and high) according to the index of physical activity (product of  
28  
29 289 the intensity - in METS - by the frequency,) and the duration of the activity.  
30  
31 290 - Depressive disorders will be detected by the Patient Health Questionnaire-9 (PHQ-9) (36),  
32  
33 291 validated in Spanish with similar behaviour to the original and good acceptance (37).  
34  
35 292 - Anxiety will be assessed using the Hospital Anxiety and Depression Scale (HADS-A scale) (38), a  
36  
37 293 14-item questionnaire validated in PC in Spain (39,40), with special interest and usefulness in  
38  
39 294 the context of PC. It is a measure composed of two sub-scales (HAD-A: anxiety and HAD-D:  
40  
41 295 depression), of 7 items each that are scored from 0 to 3. The authors recommend a threshold  
42  
43 296 of 8 points to detect possible cases of anxiety. One of the main virtues of this tool is the  
44  
45 297 suppression of somatic symptoms. However, in patients with IHD it underestimates people  
46  
47 298 with depression (41), while the sub-scale HADS-A has good specificity and predictive value for  
48  
49 299 measuring anxiety in this PC (42).  
50  
51 300 - Adherence to medication will be assessed with the Adherence Refill and Medication Scale  
52  
53 301 (ARMS-e) (43), validated in Spain and used to measure adherence to medication in patients  
54  
55  
56  
57  
58  
59  
60

1  
2  
3 302 with chronic diseases. It consists of 12 questions and there is no cut-off point, the lower the  
4  
5 303 score, the better the adherence. To quantify adherence, a value of 1 to 4 (never, sometimes,  
6  
7 304 almost always or always) is assigned to each of the responses according to a Likert-type scale.  
8  
9  
10 305 - Quality of life related to health (HRQoL) will be described and assessed with the EQ-5D-5L  
11  
12 306 index (44), a generic and standardized instrument developed by the EuroQoL Group, and  
13  
14 307 prepared in several languages, including Spanish, and used in PC (45). It relates the HRQoL  
15  
16 308 with the amount of life and offers a score for the gains in health, the Quality Adjusted Life Year  
17  
18 309 (QALY). The descriptive EQ-5D system comprises 5 dimensions (mobility, personal care, daily  
19  
20 310 activities, pain / discomfort and anxiety / depression).

21  
22  
23 311 *Explanatory and adjustment variables*

24  
25 312 - Sociodemographic: age, sex, nationality, Autonomous Community of residence (Catalonia,  
26  
27 313 Madrid or Canary Islands), marital status (married/partner, single, separated/divorced,  
28  
29 314 widowed), living alone (yes/no), educational level (incomplete primary education, complete  
30  
31 315 primary education, secondary education, university or equivalent studies), income level and  
32  
33 316 employment status (46).  
34  
35  
36 317 - Morbidity related: type of IHD (stable angina, unstable angina, MI), duration of IHD (months),  
37  
38 318 current diagnosis of heart failure in EMR (K86), left ventricular ejection fraction ( $\leq 30\%$ , 30-  
39  
40 319 35%, 35-45%, >45%), NYHA class (I-IV), number and description of chronic concomitant  
41  
42 320 diseases (47), pharmacological treatment (acetylsalicylic acid or  
43  
44 321 clopidogrel/ticagrelor/prasugrel, beta-blockers, statins, angiotensin-converting enzyme (ACE)  
45  
46 322 inhibitors, angiotensin II receptor blockers, other treatments), cardiac catheterization (yes/no)  
47  
48 323 and participation in a cardiac rehabilitation program before and during the study period  
49  
50 324 (yes/no).  
51  
52 325 - Use of health care resources: primary care (PC) visits, visits to the emergency department,  
53  
54 326 visits to specialists, number of hospitalizations, lengths of stay, prescribed medications, use of  
55  
56 327 diagnostic tests.  
57  
58  
59  
60

1  
2  
3 328 - Loss of productivity: self-administered questionnaire about work absences related to the  
4  
5 329 illness.

6  
7 330 - Use of the VCoP.

8  
9 331 This information will be collected from a patient self-reported questionnaire that the research  
10  
11 332 team will elaborate combined with information from the EMR. VCoP use data will be collected  
12  
13 333 through the platform database.

#### 14 334 **Adverse events**

15  
16 335 All significant adverse events as well as unintended consequences for each group will be collected  
17  
18 336 and described by the site researcher, nominated for each PCP and hospital, and reported to the  
19  
20 337 core team. A special form to report trial-related adverse events has been developed and  
21  
22 338 distributed.

#### 23 339 **Participant timeline**

24  
25 340 Primary and secondary outcome measures will be collected before the start of the VCoP  
26  
27 341 intervention and at 6, 12 and 18 months. See Table 1.

28  
29 342 [About here: Table 1 on Schedule of enrolment, interventions, and assessments (SPIRIT checklist)].

#### 30 343 **Sample size**

31  
32 344 The necessary number of patients to detect, by means of independent means test, an average  
33  
34 345 minimal important difference of 4 points (SD 10) in the PAM questionnaire (12,23) between the  
35  
36 346 intervention and usual care group, is 123 patients per arm. For this calculation we assume an  
37  
38 347 alpha error of 0.05, power of 80% and size is increased by the estimation of a 20% loss.

#### 39 348 **Recruitment**

40  
41 349 Patient recruitment will be organized on each Autonomous Community (Catalonia, Madrid or  
42  
43 350 Canary Islands). The recruitment will be supported by informative meetings with directors and  
44  
45 351 health care professionals (general practitioners, nurses, cardiologists) from the participating  
46  
47 352 centres. In these meetings, a 10-minute presentation describing the study aim, planned time  
48  
49 353 frame and tasks to be carried out by health care professionals, expected resources utilization and  
50  
51  
52  
53  
54  
55  
56  
57  
58  
59  
60

1  
2  
3 354 funding procedures will be detailed. Patients that fulfil inclusion criteria will be actively  
4  
5 355 encouraged by their health care professionals to participate by providing information about the  
6  
7 356 trial and collecting their informed consent and contact details (e.g. phone number / email). The  
8  
9 357 research team will invite potential participants via phone and mail to access the “e-mpodera<sup>2</sup>”  
10  
11 358 platform where they will be provided with a unique registration code (Figure 1). Patients will be  
12  
13  
14 359 consecutively included in the study; recruitment will be continuous until the sample size is  
15  
16 360 reached.

17  
18  
19 361 [About here: Figure 1 on Flow of participants].

### 20 21 362 **Allocation and blinding**

22  
23 363 Two hundred and forty-six patients will be randomly assigned to the intervention (VCoP) or control  
24  
25 364 group. The randomization will be central and automatically performed by the online “e-mpodera<sup>2</sup>”  
26  
27 365 platform and the assigned group will be communicated to the patient once he or she has entered  
28  
29 366 the platform and completed baseline assessment (Figure 1). Lack of knowledge of the  
30  
31 367 randomization sequence by the professionals who participate in the recruitment of patients will  
32  
33 368 therefore be ensured. The intervention group will be taken directly to the registration page of “e-  
34  
35 369 mpodera<sup>2</sup>” VCoP, where they will receive a personalized message to welcome them into the  
36  
37 370 platform. To warrant patient participation and cooperation, this type of intervention cannot be  
38  
39 371 blinded to patients. Data analysts will be blinded to the assignment of the intervention.

### 40 41 372 **Data management**

42  
43 373 In order to maintain participant confidentiality all information will be stored with anonymized ID  
44  
45 374 code numbers. The ID code numbers will be unrelated to participants’ identifiers, except in a  
46  
47 375 central file with the participants’ contact details. All data will be stored on an electronic database  
48  
49 376 management system located on a secure server with password-controlled access provided for  
50  
51 377 research data collection. Databases will be designed to avoid downloading inappropriate values  
52  
53 378 for every variable. Trial monitoring will be the responsibility of the core research team in charge of  
54  
55  
56  
57  
58  
59  
60

1  
2  
3 379 all quality control activities, assessing adherence to the trial protocol: timely work plan execution  
4  
5 380 and comprehensiveness of data acquisition and data quality.  
6

7 381 The Research Ethics Committees, the representatives of the Health Authority in matters of  
8  
9 382 inspection and the personnel authorized by the Promoter, may only access to check personal data,  
10  
11 383 clinical study procedures and compliance with the rules of good clinical practice (always  
12  
13 384 maintaining the confidentiality of information).  
14  
15

16 385 **Statistical analysis**

17  
18 386 Sociodemographic and clinical baseline variables for both groups will be analysed by descriptive  
19  
20 387 methods (mean (SD), median (range), n (%)). The VCoP effect on the primary and secondary  
21  
22 388 outcomes will be examined by means of multilevel linear regression, with patients as a fixed factor  
23  
24 389 (level 1) and general practitioners as a random factor (level 2), adjusting for baseline scores of the  
25  
26 390 dependent variable. We will perform the analyses on an intention-to-treat basis (a sensitivity  
27  
28 391 analysis on the per-protocol population will be also performed). Multiple imputation will be used  
29  
30 392 for missing data, if applicable (Markov Chain Monte Carlo multivariate imputation algorithm, with  
31  
32 393 10 imputations per variable). Analyses will be carried out with the statistical software R Core Team  
33  
34 394 (2014) <http://www.R-project.org/> and PASW Statistics 18.  
35  
36  
37  
38

39 395 *Cost-effectiveness analysis of the VCoP (5 months).*

40  
41 396 We will carry out an economic evaluation in which the costs and the results of the VCoP will be  
42  
43 397 compared to the usual care following the recommendations of the guidelines for the management  
44  
45 398 of patients with IHD (3–5), during the period of the clinical trial. The accepted analytical methods  
46  
47 399 by the scientific community will be followed (48). The main outcome measure will be the  
48  
49 400 incremental cost per gained QALY. The utilities for the estimation of the QALYs will be obtained  
50  
51 401 through the EQ-5D-5L questionnaire (44) that will be completed by the patient at the beginning of  
52  
53 402 the study and at each follow-up visit.  
54  
55

56 403 The perspective of the economic analysis will be that of the National Health System, including only  
57  
58 404 direct health costs, and of the social perspective, including indirect costs associated with the loss  
59  
60

1  
2  
3 405 of productivity of patients. In addition to including the short-term costs (development and  
4  
5 406 implementation of the VCoP), the costs observed during the follow-up will be included. The unit  
6  
7 407 costs will be obtained from the eHealth cost database (*Oblikue Consulting*) and from public  
8  
9 408 sources such as rates and PVP. The utilization of resources will be obtained from a patient self-  
10  
11 409 reported questionnaire described in the outcome section. In addition, information about work  
12  
13 410 absences related to the illness will be requested. As a summary result measure, the incremental  
14  
15 411 cost-effectiveness ratio (ICER) that results from dividing the difference in costs between choices by  
16  
17 412 the difference in effectiveness will be used. Non-parametric methods based on bootstrap  
18  
19 413 simulations will be used to calculate confidence intervals in the ICER. The same nonparametric  
20  
21 414 methods will be used to calculate the acceptability curve that represents the probability that each  
22  
23 415 choice will be cost-effective for different cost-effectiveness thresholds. Finally, deterministic  
24  
25 416 sensitivity analyses (one, two or several ways) will be carried out in order to assess the impact of  
26  
27 417 the parameters on the cost-effectiveness results of the VCoP.

#### 31 418 **Patient and public involvement**

32  
33  
34 419 This protocol was developed without patient or public involvement. A group of patients with IHD  
35  
36 420 will actively participate in a content-design previous stage using a co-creation methodology with  
37  
38 421 face-to-face sessions and virtual activities.

39  
40  
41 422

#### 42 423 **ETHICS AND DISSEMINATION**

43  
44  
45 424 The study is registered on ClinicalTrials.gov. code NCT03959631  
46  
47 425 (<https://clinicaltrials.gov/ct2/show/NCT03959631?recrs=b&type=Intr&cond=coronary+heart+dise>  
48  
49 426 [ase&age=1&draw=2](https://clinicaltrials.gov/ct2/show/NCT03959631?recrs=b&type=Intr&cond=coronary+heart+dise)). Informed consent will be obtained from each participant before  
50  
51 427 randomization. The project received ethics approval from the local Committees at each  
52  
53 428 participating Autonomous Community: Clinical Research Ethics Committee of Gregorio Marañón  
54  
55 429 University Hospital in Madrid, Nuestra Señora de Candelaria University Hospital in Santa Cruz de  
56  
57 430 Tenerife and from the coordinating centre IDIAP Jordi Gol in Barcelona (19/053-P). Patients will be  
58  
59  
60

1  
2  
3 431 personally informed by their physicians or nurses about the study and the possibility to participate  
4  
5 432 during a programmed consultation. They will receive written information of the proposed research  
6  
7 433 project, including information regarding the aims of the project, the duration of the participants'  
8  
9 434 involvement, the expected benefits to the participant and the procedures involved in the  
10  
11 435 participation. Recruiters will emphasize that enrolment in the study is voluntary and that  
12  
13 436 participants can withdraw at any moment of the project and that any decision they take in this  
14  
15 437 respect will have no bearing on the medical care received. Once patients have signed the written  
16  
17 438 informed consent, a researcher from the "e-mpodera" team will contact them via phone and/ or  
18  
19 439 mail to provide further information along with the necessary data (username and password) to  
20  
21 440 login into the online platform. Additionally, recruiters will highlight that information generated by  
22  
23 441 the study will be published, but no identification details will be divulged. Patients and health care  
24  
25 442 providers will be informed of whom to contact in case of any query and research staff will be  
26  
27 443 available to answer questions.

31  
32 444 We will prepare presentations to disseminate the study findings to healthcare stakeholders and  
33  
34 445 patients, and at relevant national and international conferences. We aim to publish the results of  
35  
36 446 the trial in peer-reviewed journals.

37  
38  
39 447

#### 40 41 448 **TRIAL STATUS**

42  
43 449 The recruitment of patients in each region will start in March 2020. The estimated end date of the  
44  
45 450 recruitment for this study is August 2020.

46  
47  
48 451

#### 49 50 452 **REFERENCES**

- 51  
52 453 1. Wilkins E, Wilson L, Wickramasinghe K, Bhatnagar P, Leal J, Luengo-Fernandez R, et al.  
53  
54 454 European Cardiovascular Disease Statistics 2017 edition. Eur Hear Network, Brussels  
55  
56 455 [Internet]. 2017;192. Available from: [http://www.ehnheart.org/images/CVD-statistics-](http://www.ehnheart.org/images/CVD-statistics-report-August-2017.pdf)  
57  
58 456 [report-August-2017.pdf](http://www.ehnheart.org/images/CVD-statistics-report-August-2017.pdf)



- 1  
2  
3 457 2. Instituto Nacional de Estadística. INE base. [Internet]. [cited 2018 Feb 27]. Available from:  
4  
5 458 <http://www.ine.es/inebmenu/indice.htm#12>  
6
- 7 459 3. Ibanez B, James S, Agewall S, Antunes MJ, Bucciarelli-Ducci C, Bueno H, et al. 2017 ESC  
8  
9 460 Guidelines for the management of acute myocardial infarction in patients presenting with  
10  
11 461 ST-segment elevation. *Eur Heart J*. 2018 Jan 7;39(2):119–77.  
12  
13
- 14 462 4. Knuuti J, Wijns W, Saraste A, Capodanno D, Barbato E, Funck-Brentano C, et al. 2019 ESC  
15  
16 463 Guidelines for the diagnosis and management of chronic coronary syndromes. *Eur Heart J*.  
17  
18 464 2020 Jan 14;41(3):407–77.  
19
- 20 465 5. Roffi M, Patrono C, Collet J-P, Mueller C, Valgimigli M, Andreotti F, et al. 2015 ESC  
21  
22 466 Guidelines for the management of acute coronary syndromes in patients presenting  
23  
24 467 without persistent ST-segment elevation. *Eur Heart J*. 2016 Jan 14;37(3):267–315.  
25  
26
- 27 468 6. García-Porrero E, Andrés-Esteban E, de Pablo-Zarzosa C, León-Latre M. *Cardiología*  
28  
29 469 preventiva y rehabilitación. *Rev Española Cardiol*. 2010 Jan;63:40–8.  
30
- 31 470 7. Piepoli MF, Corrà U, Dendale P, Frederix I, Prescott E, Schmid JP, et al. Challenges in  
32  
33 471 secondary prevention after acute myocardial infarction: A call for action. *Eur J Prev Cardiol*.  
34  
35 472 2016 Dec 27;23(18):1994–2006.  
36  
37
- 38 473 8. Anderson L, Thompson DR, Oldridge N, Zwisler A-D, Rees K, Martin N, et al. Exercise-based  
39  
40 474 cardiac rehabilitation for coronary heart disease. *Cochrane Database Syst Rev*. 2016 Jan  
41  
42 475 5;(1).  
43  
44
- 45 476 9. EMPATHiE Consortium. EMPATHiE Empowering patients in the management of chronic  
46  
47 477 diseases. Final Summary Report. 2014.  
48
- 49 478 10. Hibbard JH, Greene J. What The Evidence Shows About Patient Activation: Better Health  
50  
51 479 Outcomes And Care Experiences; Fewer Data On Costs. *Health Aff*. 2013 Feb 1;32(2):207–  
52  
53 480 14.  
54  
55
- 56 481 11. Greene J, Hibbard JH. Why Does Patient Activation Matter? An Examination of the  
57  
58 482 Relationships Between Patient Activation and Health-Related Outcomes. *J Gen Intern Med*.  
59  
60

- 1  
2  
3 483 2012 May 30;27(5):520–6.  
4  
5 484 12. Skolasky RL, Green AF, Scharfstein D, Boulton C, Reider L, Wegener ST. Psychometric  
6  
7 485 Properties of the Patient Activation Measure among Multimorbid Older Adults. *Health Serv*  
8  
9 486 *Res.* 2011 Apr;46(2):457–78.  
10  
11 487 13. Salyers MP, Matthias MS, Spann CL, Lydick JM, Rollins AL, Frankel RM. The Role of Patient  
12  
13 488 Activation in Psychiatric Visits. *Psychiatr Serv.* 2009 Nov;60(11):1535–9.  
14  
15 489 14. Schmittdiel J, Mosen DM, Glasgow RE, Hibbard J, Remmers C, Bellows J. Patient Assessment  
16  
17 490 of Chronic Illness Care (PACIC) and Improved Patient-centered Outcomes for Chronic  
18  
19 491 Conditions. *J Gen Intern Med.* 2008 Jan 21;23(1):77–80.  
20  
21 492 15. Mosen DM, Schmittdiel J, Hibbard J, Sobel D, Remmers C, Bellows J. Is Patient Activation  
22  
23 493 Associated With Outcomes of Care for Adults With Chronic Conditions? *J Ambul Care*  
24  
25 494 *Manag.* 2007;30(1):21–9.  
26  
27 495 16. Náfrádi L, Nakamoto K, Schulz PJ. Is patient empowerment the key to promote adherence?  
28  
29 496 A systematic review of the relationship between self-efficacy, health locus of control and  
30  
31 497 medication adherence. Asnani MR, editor. *PLoS One.* 2017 Oct 17;12(10):e0186458.  
32  
33 498 17. Risling T, Martinez J, Young J, Thorp-Froslic N. Evaluating Patient Empowerment in  
34  
35 499 Association With eHealth Technology: Scoping Review. *J Med Internet Res.* 2017 Sep  
36  
37 500 29;19(9):e329.  
38  
39 501 18. Li LC, Grimshaw JM, Nielsen C, Judd M, Coyte PC, Graham ID. Evolution of Wenger's  
40  
41 502 concept of community of practice. *Implement Sci.* 2009 Dec 1;4(1):11.  
42  
43 503 19. Oliva A. *Psychosocial Intervention.* 2013;22(1):15–23.  
44  
45 504 20. Pinilla J, Barber P, B G. *El coste de la enfermedad potencialmente prevenible en España.*  
46  
47 505 *Madrid; 2017.*  
48  
49 506 21. Bermejo-Caja CJ, Koatz D, Orrego C, Perestelo-Pérez L, González-González AI, Ballester M,  
50  
51 507 et al. Acceptability and feasibility of a virtual community of practice to primary care  
52  
53 508 professionals regarding patient empowerment: A qualitative pilot study. *BMC Health Serv*  
54  
55  
56  
57  
58  
59  
60

- 1  
2  
3 509 Res. 2019;19(1):1–10.  
4  
5 510 22. National Clinical Guideline Centre. MI - Secondary Prevention: Secondary Prevention in  
6  
7 511 Primary and Secondary Care for Patients Following a Myocardial Infarction: Partial Update  
8  
9 512 of NICE CG48 [Internet]. London: Royal College of Physicians; 2013. Available from:  
10  
11 513 <http://www.ncbi.nlm.nih.gov/pubmed/25340229>  
12  
13  
14 514 23. Moreno-Chico C, González-de Paz L, Monforte-Royo C, Arrighi E, Navarro-Rubio MD, Gallart  
15  
16 515 Fernández-Puebla A. Adaptation to European Spanish and psychometric properties of the  
17  
18 516 Patient Activation Measure 13 in patients with chronic diseases. *Fam Pract*. 2017 Oct  
19  
20 517 1;34(5):627–34.  
21  
22  
23 518 24. González-González AI, Orrego C, Perestelo-Perez L, Bermejo-Caja CJ, Mora N, Koatz D, et al.  
24  
25 519 Effectiveness of a virtual intervention for primary healthcare professionals aimed at  
26  
27 520 improving attitudes towards the empowerment of patients with chronic diseases: Study  
28  
29 521 protocol for a cluster randomized controlled trial (e-MPODERA project). *Trials*. 2017;18(1).  
30  
31  
32 522 25. Alm-Roijer C, Stagmo M, Udén G, Erhardt L. Better Knowledge Improves Adherence to  
33  
34 523 Lifestyle Changes and Medication in Patients with Coronary Heart Disease. *Eur J Cardiovasc*  
35  
36 524 *Nurs*. 2004 Dec 24;3(4):321–30.  
37  
38  
39 525 26. Alm-Roijer C, Fridlund B, Stagmo M, Erhardt L. Knowing your risk factors for coronary heart  
40  
41 526 disease improves adherence to advice on lifestyle changes and medication. *J Cardiovasc*  
42  
43 527 *Nurs*. 21(5):E24-31.  
44  
45  
46 528 27. Saffi MAL, Macedo Junior LJJ de, Trojahn MM, Polanczyk CA, Rabelo-Silva ER. Validity and  
47  
48 529 reliability of a questionnaire on knowledge of cardiovascular risk factors for use in Brazil.  
49  
50 530 *Rev da Esc Enferm da USP*. 2013 Oct;47(5):1083–9.  
51  
52  
53 531 28. Lorig KR, Ritter PL, Gonzalez VM. Hispanic Chronic Disease Self-Management. *Nurs Res*.  
54  
55 532 2003 Nov;52(6):361–9.  
56  
57 533 29. Ritter PL, Lorig K. The English and Spanish Self-Efficacy to Manage Chronic Disease Scale  
58  
59 534 measures were validated using multiple studies. *J Clin Epidemiol*. 2014 Nov;67(11):1265–  
60

- 1  
2  
3 535 73.  
4  
5 536 30. Salvadó-Hernández C, Cosculluela-Torres P, Blanes-Monllor C, Parellada-Esquius N,  
6  
7 537 Méndez-Galeano C, Maroto-Villanova N, et al. Insuficiencia cardiaca en atención primaria:  
8  
9 538 actitudes, conocimientos y autocuidado. *Atención Primaria*. 2018 Apr;50(4):213–21.  
10  
11 539 31. Trichopoulou A, Costacou T, Bamia C, Trichopoulos D. Adherence to a Mediterranean Diet  
12  
13 540 and Survival in a Greek Population. *N Engl J Med*. 2003 Jun 26;348(26):2599–608.  
14  
15 541 32. Martínez-González MA, García-Arellano A, Toledo E, Salas-Salvadó J, Buil-Cosiales P, Corella  
16  
17 542 D, et al. A 14-Item Mediterranean Diet Assessment Tool and Obesity Indexes among High-  
18  
19 543 Risk Subjects: The PREDIMED Trial. Peiró C, editor. *PLoS One*. 2012 Aug 14;7(8):e43134.  
20  
21 544 33. Sánchez-Tainta A, Zazpe I, Bes-Rastrollo M, Salas-Salvadó J, Bullo M, Sorlí JV, et al.  
22  
23 545 Nutritional adequacy according to carbohydrates and fat quality. *Eur J Nutr*. 2016 Feb  
24  
25 546 24;55(1):93–106.  
26  
27 547 34. Estruch R, Ros E, Salas-Salvadó J, Covas M-I, Corella D, Arós F, et al. Primary Prevention of  
28  
29 548 Cardiovascular Disease with a Mediterranean Diet. *N Engl J Med*. 2013 Apr 4;368(14):1279–  
30  
31 549 90.  
32  
33 550 35. Mantilla Toloza SC, Gómez-Conesa A. El Cuestionario Internacional de Actividad Física. Un  
34  
35 551 instrumento adecuado en el seguimiento de la actividad física poblacional. *Rev Iberoam*  
36  
37 552 *Fisioter y Kinesiol*. 2007 Jan;10(1):48–52.  
38  
39 553 36. Spitzer RL. Validation and utility of a self-report version of PRIME-MD: the PHQ primary  
40  
41 554 care study. *Primary Care Evaluation of Mental Disorders. Patient Health Questionnaire*.  
42  
43 555 *JAMA*. 1999 Nov 10;282(18):1737.  
44  
45 556 37. Diez-Quevedo C, Rangil T, Sanchez-Planell L, Kroenke K, Spitzer RL. Validation and Utility of  
46  
47 557 the Patient Health Questionnaire in Diagnosing Mental Disorders in 1003 General Hospital  
48  
49 558 Spanish Inpatients. *Psychosom Med*. 2001 Jul;63(4):679–86.  
50  
51 559 38. Quintana JM, Padierna A, Esteban C, Arostegui I, Bilbao A, Ruiz I. Evaluation of the  
52  
53 560 psychometric characteristics of the Spanish version of the Hospital Anxiety and Depression  
54  
55  
56  
57  
58  
59  
60

- 1  
2  
3 561 Scale. *Acta Psychiatr Scand*. 2003 Mar;107(3):216–21.  
4  
5 562 39. Herrero MJ, Blanch J, Peri JM, De Pablo J, Pintor L, Bulbena A. A validation study of the  
6  
7 563 hospital anxiety and depression scale (HADS) in a Spanish population. *Gen Hosp Psychiatry*.  
8  
9 564 2003 Jul;25(4):277–83.  
10  
11 565 40. Terol-Cantero MC, Cabrera-Perona V, Martín-Aragón M. Revisión de estudios de la Escala  
12  
13 566 de Ansiedad y Depresión Hospitalaria (HAD) en muestras españolas. *An Psicol*. 2015 Apr  
14  
15 567 25;31(2):494.  
16  
17 568 41. Morys JM, Bellwon J, Adamczyk K, Gruchała M. Depression and anxiety in patients with  
18  
19 569 coronary artery disease, measured by means of self-report measures and clinician-rated  
20  
21 570 instrument. *Kardiol Pol*. 2016;74(1):53–60.  
22  
23 571 42. Bunevicius A, Staniute M, Brozaitiene J, Pop VJ, Neverauskas J, Bunevicius R. Screening for  
24  
25 572 anxiety disorders in patients with coronary artery disease. *Health Qual Life Outcomes*.  
26  
27 573 2013;11(1):37.  
28  
29 574 43. González-Bueno J, Calvo-Cidoncha E, Sevilla-Sánchez D, Espauella-Panicot J, Codina-Jané C,  
30  
31 575 Santos-Ramos B. Spanish translation and cross-cultural adaptation of the ARMS-scale for  
32  
33 576 measuring medication adherence in polypathological patients. *Aten Primaria*.  
34  
35 577 2017;49(8):459–64.  
36  
37 578 44. Herdman M, Gudex C, Lloyd A, Janssen M, Kind P, Parkin D, et al. Development and  
38  
39 579 preliminary testing of the new five-level version of EQ-5D (EQ-5D-5L). *Qual Life Res*. 2011  
40  
41 580 Dec 9;20(10):1727–36.  
42  
43 581 45. Herdman M, Badia X, Berra S. El EuroQol-5D: una alternativa sencilla para la medición de la  
44  
45 582 calidad de vida relacionada con la salud en atención primaria. *Atención Primaria*.  
46  
47 583 2001;28(6):425–9.  
48  
49 584 46. Schultz WM, Kelli HM, Lisko JC, Varghese T, Shen J, Sandesara P, et al. Socioeconomic  
50  
51 585 Status and Cardiovascular Outcomes. *Circulation*. 2018 May 15;137(20):2166–78.  
52  
53 586 47. O'Halloran J, Miller GC, Britt H. Defining chronic conditions for primary care with ICPC-2.  
54  
55  
56  
57  
58  
59  
60

1  
2  
3 587 Fam Pract. 2004 Aug;21(4):381–6.  
4

5 588 48. Glick H, Doshi J, Sonnad S, Polsky D. Economic Evaluation in Clinical Trials. 1st ed. Oxford:  
6  
7 589 Oxford University Press; 2007.  
8

9 590 49. Chan A-W, Tetzlaff JM, Gotzsche PC, Altman DG, Mann H, Berlin JA, et al. SPIRIT 2013  
10  
11 591 explanation and elaboration: guidance for protocols of clinical trials. BMJ. 2013 Jan  
12  
13 592 9;346(jan08 15):e7586–e7586.  
14  
15

16 593

#### 17 18 594 **CONTRIBUTORS**

19  
20 595 AIG wrote the initial draft of the protocol. CO is the guarantor of the trial. AIG, CO, LP, DK, VP and

21  
22 596 MB conceived the project. SG and AR provided the methodological guidance. AT, VR, ATC, JMR,

23  
24 597 JCR, SD, LM, JGG, NVC, AR, JCdC, MM, YdR, ET and ABR are co-supervisors of this project, providing

25  
26 598 advice at all stages of the development of the protocol, and contributed to the revision of the

27  
28 599 manuscript. All authors read and approved the final manuscript.  
29

#### 30 31 600 **FUNDINGS**

32  
33 601 This study has been funded by Instituto de Salud Carlos III through the project “PI18/01404,

34  
35 602 PI18/01397, PI18/01333”, Co-funded by European Regional Development Fund, (ERDF) “A way of

36  
37 603 shaping Europe”  
38

#### 39 40 604 **DISCLAIMER**

41  
42 605 The funder had no role in developing the protocol or obtaining the results for this review.  
43

#### 44 45 606 **COMPETING INTERES**

46  
47 607 None declared  
48

#### 49 50 608 **DATA SHARING**

51  
52 609 No additional data available  
53

#### 54 55 610 **PATIENT AND PUBLIC INVOLVEMENT**

56  
57 611 Not required  
58

#### 59 60 612 **WORD COUNT**

1  
2  
3  
4  
5  
6  
7  
8  
9  
10  
11  
12  
13  
14  
15  
16  
17  
18  
19  
20  
21  
22  
23  
24  
25  
26  
27  
28  
29  
30  
31  
32  
33  
34  
35  
36  
37  
38  
39  
40  
41  
42  
43  
44  
45  
46  
47  
48  
49  
50  
51  
52  
53  
54  
55  
56  
57  
58  
59  
60

613 3,225

For peer review only

Table 1. Schedule of enrolment, interventions, and assessments (SPIRIT checklist) (49)

|                                                | STUDY PERIOD                |            |                 |                 |                  |                  |
|------------------------------------------------|-----------------------------|------------|-----------------|-----------------|------------------|------------------|
|                                                | Enrolment                   | Allocation | Post-allocation |                 |                  | Close-out        |
| TIMEPOINT                                      | <i>Before randomization</i> | 0          | <i>Baseline</i> | <i>6 months</i> | <i>12 months</i> | <i>18 months</i> |
| <b>ENROLMENT:</b>                              |                             |            |                 |                 |                  |                  |
| Eligibility screen                             | X                           |            |                 |                 |                  |                  |
| Informed consent                               | X                           |            |                 |                 |                  |                  |
| Allocation                                     |                             | X          |                 |                 |                  |                  |
| <b>INTERVENTIONS:</b>                          |                             |            |                 |                 |                  |                  |
| <i>VCoP</i>                                    |                             |            |                 |                 |                  |                  |
| <i>Usual care</i>                              |                             |            |                 |                 |                  |                  |
| <b>ASSESSMENTS:</b>                            |                             |            |                 |                 |                  |                  |
| <i>PAM</i>                                     | X                           |            |                 | X               | X                | X                |
| <i>Sociodemographic and clinical variables</i> | X                           |            |                 | X*              | X*               | X*               |
| <i>Knowledge</i>                               | X                           |            |                 | X               | X                | X                |
| <i>SMCDX</i>                                   | X                           |            |                 | X               | X                | X                |
| <i>Mediterranean Diet Questionnaire</i>        | X                           |            |                 | X               | X                | X                |
| <i>IPAQ</i>                                    | X                           |            |                 | X               | X                | X                |
| <i>PHQ-9</i>                                   | X                           |            |                 | X               | X                | X                |
| <i>HADS-A</i>                                  | X                           |            |                 | X               | X                | X                |
| <i>ARMS-e</i>                                  | X                           |            |                 | X               | X                | X                |
| <i>EQ-5D-5L</i>                                | X                           |            |                 | X               | X                | X                |
| <i>Use of resources</i>                        |                             |            |                 |                 |                  |                  |
| <i>Use of VCoP</i>                             |                             |            |                 |                 |                  |                  |



|                       |  |  |  |  |  |  |
|-----------------------|--|--|--|--|--|--|
| <b>Adverse events</b> |  |  |  |  |  |  |
|-----------------------|--|--|--|--|--|--|

HADS-A = Hospital Anxiety and Depression Scale; IPAQ = International Physical Activity Questionnaire; ARMS-e = Adherence Refill and Medication Scale; PAM = Patient Activation Measure; PHQ-9 = Patient Health Questionnaire; SMCDs = Self-efficacy Managing Chronic Disease Scale; VCoP = Virtual Community of Practice.  
\*Follow-up of just clinical variables

For peer review only

1  
2  
3  
4  
5  
6  
7  
8  
9  
10  
11  
12  
13  
14  
15  
16  
17  
18  
19  
20  
21  
22  
23  
24  
25  
26  
27  
28  
29  
30  
31  
32  
33  
34  
35  
36  
37  
38  
39  
40  
41  
42  
43  
44  
45  
46  
47  
48  
49  
50  
51  
52  
53  
54  
55  
56  
57  
58  
59  
60

1  
2  
3 **Figure 1. Flow of participants (54)**  
4  
5  
6  
7  
8  
9  
10  
11  
12  
13  
14  
15  
16  
17  
18  
19  
20  
21  
22  
23  
24  
25  
26  
27  
28  
29  
30  
31  
32  
33  
34  
35  
36  
37  
38  
39  
40  
41  
42  
43  
44  
45  
46  
47  
48  
49  
50  
51  
52  
53  
54  
55  
56  
57  
58  
59  
60

For peer review only

Figure 1. Flow of participants (49)

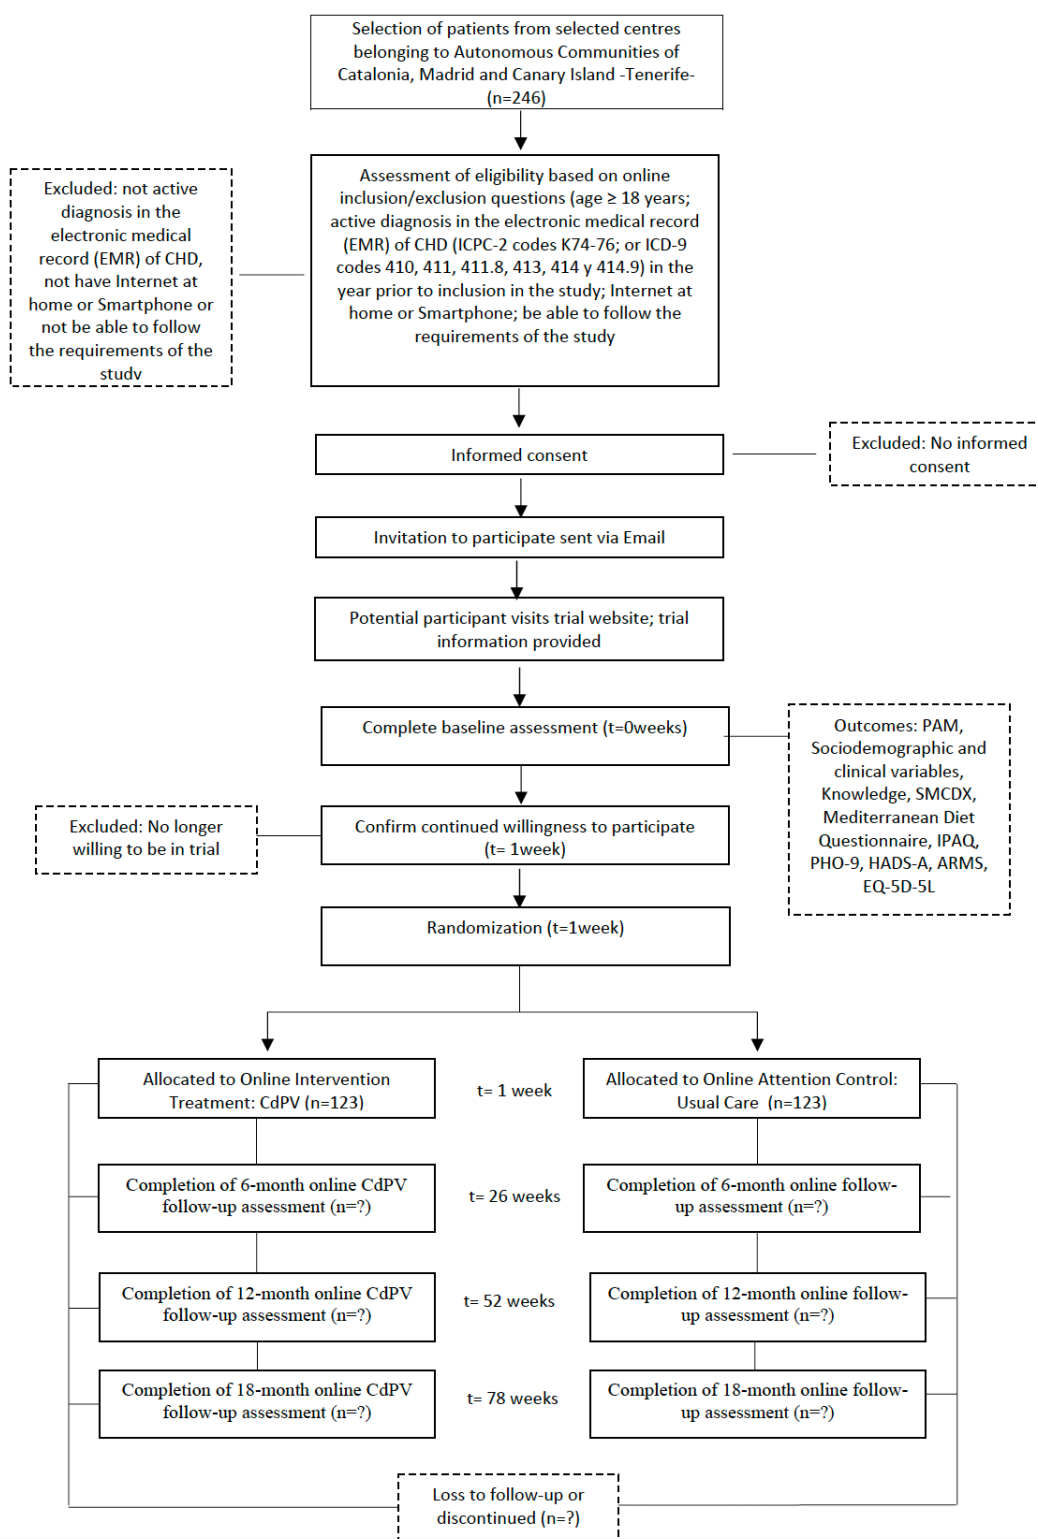

**Additional file 1. Informed consent****HOJA DE INFORMACIÓN AL PACIENTE****FASE ENSAYO CLÍNICO****INTRODUCCIÓN**

Estimado/a Sr/a:

Le comunicamos que se está desarrollando la puesta en marcha del ensayo clínico denominado **“Efectividad y coste-efectividad de una intervención virtual (Comunidad de Práctica) para la mejora del empoderamiento de pacientes con cardiopatía isquémica en atención primaria: ensayo controlado aleatorizado por conglomerados”** (Cataluña: **PI18/01404/**, Madrid: **PI18/01397**, Canarias: **PI18/01333**).

Este estudio ha sido aprobado por los Comités Éticos de los centros participantes de acuerdo con la legislación vigente, la Ley Orgánica 3/2018, de 5 de diciembre de Protección de Datos Personales y garantía de los derechos digitales, y a la aplicación del Reglamento (UE) 2016/679 del Parlamento europeo y del Consejo de 27 de abril de 2016 de Protección de Datos (RGPD) por el que se regula este tipo de estudios.

Nuestra intención es tan solo que usted reciba la información correcta y suficiente para que pueda evaluar y juzgar si quiere o no participar en este estudio. Para ello lea esta hoja informativa con atención y nosotros le aclararemos las dudas que le puedan surgir después de la explicación. Además, puede consultar con las personas que considere oportuno.

**PARTICIPACIÓN VOLUNTARIA**

Debe saber que su participación en este estudio es voluntaria y que puede decidir no participar o cambiar su decisión y retirar el consentimiento en cualquier momento, sin que por ello se altere la relación con su médico ni se produzca perjuicio alguno en su tratamiento.

**¿Quiénes son los investigadores?**

El equipo de investigación está formado por un equipo multidisciplinar (medicina, psicología, estadística y evaluación de servicios sanitarios, médicos de familia, enfermeras, cardiólogos) cuyos miembros pertenecen a las siguientes instituciones:

Fundación Avedis Donabedian, Gerencia Asistencial de Atención Primaria (GAAP) del Servicio Madrileño de Salud y Servicio de Evaluación del Servicio Canario de la Salud (SESCS).

Este proyecto ha surgido de una iniciativa colaborativa en el marco de la Red de Investigación en Servicios de Salud en Enfermedades Crónicas (REDISSEC).

## DESCRIPCIÓN GENERAL DEL ESTUDIO

### ¿Por qué se hace este estudio?

Para evaluar la efectividad de una de una Comunidad de Práctica (CdP) virtual dirigida a pacientes con cardiopatía isquémica (CI) para mejorar su conocimiento, habilidades y autoconfianza para gestionar su propia salud y de la asistencia sanitaria que recibe.

### ¿Quién puede participar?

Si usted es mayor de 18 años, tiene cardiopatía isquémica, dispone de internet en su hogar y/o Smartphone.

### Procedimiento del estudio:

Existirán dos grupos de estudio, Grupo de intervención (GI) y Grupo Control (GC), y a los pacientes se les asignará uno u otro al azar. En el caso de que usted quisiera participar en el estudio podría estar en cualquiera de los 2 grupos.

### Si usted desea participar, ¿en qué consiste su participación?

La duración del estudio será de 18 meses. Al comienzo del estudio, a los 6, 12 y 18 meses, los participantes cumplimentarán unos cuestionarios online sobre aspectos relacionados con el nivel de activación de cada participante en las decisiones relacionadas con su salud (cuestionario PAM), el conocimiento de la enfermedad, la actitud hacia la enfermedad, la adherencia a la dieta mediterránea, la actividad física y algunos cuestionarios relacionados con variables psicológicas. Cumplimentar estos cuestionarios le llevará aproximadamente 30 minutos.

Si de forma aleatoria cae en el Grupo de intervención, se le ofrecerá participar durante 18 meses en una Comunidad de Práctica Virtual (CdPv) basada en una plataforma web 2.0. Se pondrá a disposición un enlace (vía email) para registrarse e iniciar la participación voluntaria.

Dentro de esta CdPv usted podrá disponer de elementos educativos, lúdicos y herramientas para facilitar el aprendizaje y la transferencia de conocimientos y de sus actitudes. Además, se trabajarán diversas temáticas relacionadas con: competencias en salud, técnicas de

1  
2  
3 autoeficacia, estilos de vida, aceptación de la enfermedad crónica y toma de decisiones  
4 compartida, dieta, planes de ejercicio, gestión del estrés, etc.  
5  
6

7 Si de forma aleatoria cae en el Grupo Control, usted seguirá los cuidados y atención propias  
8 de la práctica clínica habitual.  
9

## 10 **RIESGOS Y BENEFICIOS DE LA PARTICIPACIÓN EN ESTE ESTUDIO**

11  
12  
13  
14 No se prevé ningún tipo de riesgo físico ni psicológico que pueda ser consecuencia de la  
15 participación en este estudio.  
16

17  
18 El principal beneficio para los pacientes con CI será el contribuir a mejorar su conocimiento,  
19 habilidades y autoconfianza para la gestión de su propia salud y de la asistencia sanitaria.  
20

## 21 **CONFIDENCIALIDAD**

22  
23 El tratamiento, la comunicación y la cesión de los datos de carácter personal de todos los  
24 sujetos participantes se ajustará a lo dispuesto en la Ley Orgánica 3/2018, de 5 de diciembre  
25 de Protección de Datos Personales y garantía de los derechos digitales, y a la aplicación de  
26 del Reglamento (UE) 2016/679 del Parlamento europeo y del Consejo de 27 de abril de 2016  
27 de Protección de Datos (RGPD), por lo que es importante que conozca la siguiente  
28 información:  
29  
30  
31  
32

33  
34  
35 - Además de los derechos que ya conoce (acceso, modificación, oposición y cancelación de  
36 datos) ahora también puede limitar el tratamiento de datos que sean incorrectos, solicitar  
37 una copia o que se trasladen a un tercero (portabilidad) los datos que usted ha facilitado  
38 para el estudio. Para ejercitar sus derechos, diríjase al investigador principal del estudio. Le  
39 recordamos que los datos no se pueden eliminar, aunque deje de participar en el estudio  
40 para garantizar la validez de la investigación y cumplir con los deberes legales y los  
41 requisitos de autorización de medicamentos. Así mismo tiene derecho a dirigirse a la  
42 Agencia de Protección de Datos si no quedara satisfecho/  
43  
44  
45  
46

47  
48 - Tanto el Centro como el Promotor y el Investigador son responsables respectivamente del  
49 tratamiento de sus datos y se comprometen a cumplir con la normativa de protección de  
50 datos en vigor. Los datos recogidos para el estudio estarán identificados mediante un  
51 código, de manera que no se incluya información que pueda identificarle, y sólo su médico  
52 del estudio/colaboradores podrá relacionar dichos datos con usted y con su historia clínica.  
53 Por lo tanto, su identidad no será revelada a ninguna otra persona salvo a las autoridades  
54 sanitarias, cuando así lo requieran o en casos de urgencia médica. Los Comités de Ética de  
55 la Investigación, los representantes de la Autoridad Sanitaria en materia de inspección y el  
56 personal autorizado por el Promotor, únicamente podrán acceder para comprobar los datos  
57  
58  
59  
60

1  
2  
3 personales, los procedimientos del estudio clínico y el cumplimiento de las normas de  
4 buena práctica clínica (siempre manteniendo la confidencialidad de la información).  
5  
6

7 - El Investigador y el Promotor están obligados a conservar los datos recogidos para el  
8 estudio al menos hasta 25 años tras su finalización. Posteriormente, su información  
9 personal solo se conservará por el centro para el cuidado de su salud y por el promotor para  
10 otros fines de investigación científica si usted hubiera otorgado su consentimiento para ello,  
11 y si así lo permite la ley y requisitos éticos aplicables.  
12  
13  
14

### 15 **INFORMACIÓN ADICIONAL**

16  
17  
18 Tal y como exige la ley, para participar deberá firmar y fechar el documento de  
19 consentimiento informado.  
20  
21

22  
23 **COORDINADORA DEL PROYECTO (CATALUÑA):**

24 Dra. Carola Orrego, Fundación Avedis Donabedian

25 Contacto: [corrego@fadq.org](mailto:corrego@fadq.org)  
26  
27

28 **INVESTIGADORA PRINCIPAL (MADRID):**

29 Ana Isabel González González, Centro de Salud Vicente Muzas, Gerencia Asistencial de  
30 Atención Primaria. Servicio Madrileño de Salud

31 Contacto: [aisabel.gonzalezg@salud.madrid.org](mailto:aisabel.gonzalezg@salud.madrid.org)  
32  
33

34  
35 **INVESTIGADORA PRINCIPAL (CANARIAS):**

36 Lilisbeth Perestelo Pérez, Servicio de Evaluación del Servicio Canario de la Salud

37 Contacto: [lperperr@gobiernodecanarias.org](mailto:lperperr@gobiernodecanarias.org)  
38  
39  
40  
41  
42  
43  
44  
45  
46  
47  
48  
49  
50  
51  
52  
53  
54  
55  
56  
57  
58  
59  
60

**CONSENTIMIENTO INFORMADO PARA PACIENTES**

Yo (nombre y apellidos)

.....

He leído la hoja de información que se me ha entregado.

He podido hacer preguntas sobre el estudio.

He recibido suficiente información sobre el estudio.

He hablado con:

.....

Comprendo que mi participación es voluntaria.

Comprendo que puedo retirarme del estudio:

1º Cuando quiera

2º Sin tener que dar explicaciones.

3º Sin que esto repercuta en mis cuidados médicos.

- Presto libremente mi conformidad para participar en el estudio y doy mi consentimiento para el acceso y utilización de mis datos en las condiciones detalladas en la hoja de información.

**Nombre del participante:**

**Nombre del investigador:**

**Fecha:**

**Fecha:**

**Firma:**

**Firma:**



1  
2  
3  
4  
5  
6  
7  
8  
9  
10  
11  
12  
13  
14  
15  
16  
17  
18  
19  
20  
21  
22  
23  
24  
25  
26  
27  
28  
29  
30  
31  
32  
33  
34  
35  
36  
37  
38  
39  
40  
41  
42  
43  
44  
45  
46  
47  
48  
49  
50  
51  
52  
53  
54  
55  
56  
57  
58  
59  
60

For peer review only

## Additional file 2. SPIRIT checklist (49)

| Section / item                    | Item No | Description                                                                                                                                                                                                                                                                              | Page    |
|-----------------------------------|---------|------------------------------------------------------------------------------------------------------------------------------------------------------------------------------------------------------------------------------------------------------------------------------------------|---------|
| <b>Administrative information</b> |         |                                                                                                                                                                                                                                                                                          |         |
| Title                             | 1       | Descriptive title identifying the study design, population, interventions, and, if applicable, trial acronym                                                                                                                                                                             | 1       |
| Trial registration                | 2a      | Trial identifier and registry name. If not yet registered, name of intended registry                                                                                                                                                                                                     | 7       |
|                                   | 2b      | All items from the World Health Organization Trial Registration Data Set                                                                                                                                                                                                                 | 7       |
| Protocol version                  | 3       | Date and version identifier                                                                                                                                                                                                                                                              | 7       |
| Funding                           | 4       | Sources and types of financial, material, and other support                                                                                                                                                                                                                              | 27      |
| Roles and responsibilities        | 5a      | Name, affiliations, and roles of protocol contributors                                                                                                                                                                                                                                   | 1-5, 26 |
|                                   | 5b      | Name and contact information for the trial sponsor                                                                                                                                                                                                                                       | 5       |
|                                   | 5c      | Role of study sponsor and funders, if any, in study design; collection, management, analysis, and interpretation of data; writing of the report; and the decision to submit the report for publication, including whether they will have ultimate authority over any of these activities | 27      |
|                                   | 5d      | Composition, roles, and responsibilities of the coordinating centre, steering committee, endpoint adjudication committee, data management team, and other individuals or groups overseeing the trial, if applicable (see Item 21a for data monitoring committee)                         | 16-17   |
| <b>Introduction</b>               |         |                                                                                                                                                                                                                                                                                          |         |
| Background                        | 6a      | Description of research question and justification for undertaking the trial, including summary of relevant studies (published and unpublished) examining benefits and harms for each intervention                                                                                       | 9,10    |
|                                   | 6b      | Explanation for choice of comparators                                                                                                                                                                                                                                                    | 9,10    |
| Objectives                        | 7       | Specific objectives or hypotheses                                                                                                                                                                                                                                                        | 10      |
| Trial design                      | 8       | Description of trial design including type of trial (eg, parallel group, crossover, factorial, single group), allocation ratio, and framework (eg, superiority, equivalence, noninferiority, exploratory)                                                                                | 10      |
| <b>Methods</b>                    |         |                                                                                                                                                                                                                                                                                          |         |
| Study setting                     | 9       | Description of study settings (eg, community clinic, academic hospital) and list of countries where data will be collected. Reference to where list of study sites can be obtained                                                                                                       | 10      |
| Eligibility criteria              | 10      | Inclusion and exclusion criteria for participants. If applicable, eligibility criteria for study centres and individuals who will perform the interventions (eg, surgeons, psychotherapists)                                                                                             | 10-11   |

|                                                              |     |                                                                                                                                                                                                                                                                                                                                                                                |           |
|--------------------------------------------------------------|-----|--------------------------------------------------------------------------------------------------------------------------------------------------------------------------------------------------------------------------------------------------------------------------------------------------------------------------------------------------------------------------------|-----------|
| Interventions                                                | 11a | Interventions for each group with sufficient detail to allow replication, including how and when they will be administered                                                                                                                                                                                                                                                     | 11-12     |
|                                                              | 11b | Criteria for discontinuing or modifying allocated interventions for a given trial participant (eg, drug dose change in response to harms, participant request, or improving/worsening disease)                                                                                                                                                                                 | 14        |
|                                                              | 11c | Strategies to improve adherence to intervention protocols, and any procedures for monitoring adherence (eg, drug tablet return, laboratory tests)                                                                                                                                                                                                                              | 11-12     |
|                                                              | 11d | Relevant concomitant care and interventions that are permitted or prohibited during the trial                                                                                                                                                                                                                                                                                  | 11-12     |
| Outcomes                                                     | 12  | Primary, secondary, and other outcomes, including the specific measurement variable (eg, systolic blood pressure), analysis metric (eg, change from baseline, final value, time to event), method of aggregation (eg, median, proportion), and time point for each outcome. Explanation of the clinical relevance of chosen efficacy and harm outcomes is strongly recommended | 12-14     |
| Participant timeline                                         | 13  | Time schedule of enrolment, interventions (including any run-ins and washouts), assessments, and visits for participants. A schematic diagram is highly recommended (see fig 1[f1])                                                                                                                                                                                            | 15, 28-30 |
| Sample size                                                  | 14  | Time schedule of enrolment, interventions (including any run-ins and washouts), assessments, and visits for participants. A schematic diagram is highly recommended (see fig 1[f1])                                                                                                                                                                                            | 15, 28-30 |
| Recruitment                                                  | 15  | Strategies for achieving adequate participant enrolment to reach target sample size                                                                                                                                                                                                                                                                                            | 15        |
| Methods: Assignment of interventions (for controlled trials) |     |                                                                                                                                                                                                                                                                                                                                                                                |           |
| Allocation:                                                  |     |                                                                                                                                                                                                                                                                                                                                                                                |           |
| Sequence generation                                          | 16a | Method of generating the allocation sequence (eg, computer-generated random numbers) and list of any factors for stratification. To reduce predictability of a random sequence, details of any planned restriction (eg, blocking) should be provided in a separate document that is unavailable to those who enrol participants or assign interventions                        | 16        |
| Allocation concealment mechanism                             | 16b | Mechanism of implementing the allocation sequence (eg, central telephone; sequentially numbered, opaque, sealed envelopes), describing any steps to conceal the sequence until interventions are assigned                                                                                                                                                                      | 16        |
| Implementation                                               | 16c | Who will generate the allocation sequence, who will enrol participants, and who will assign participants to interventions                                                                                                                                                                                                                                                      | 16        |

|                                                    |     |                                                                                                                                                                                                                                                                                                                                                                                                              |       |
|----------------------------------------------------|-----|--------------------------------------------------------------------------------------------------------------------------------------------------------------------------------------------------------------------------------------------------------------------------------------------------------------------------------------------------------------------------------------------------------------|-------|
| Blinding (masking)                                 | 17a | Who will be blinded after assignment to interventions (eg, trial participants, care providers, outcome assessors, data analysts) and how                                                                                                                                                                                                                                                                     | 16    |
|                                                    | 17b | If blinded, circumstances under which unblinding is permissible and procedure for revealing a participant's allocated intervention during the trial                                                                                                                                                                                                                                                          | 16    |
| Methods: Data collection, management, and analysis |     |                                                                                                                                                                                                                                                                                                                                                                                                              |       |
| Data collection methods                            | 18a | Plans for assessment and collection of outcome, baseline, and other trial data, including any related processes to promote data quality (eg, duplicate measurements, training of assessors) and a description of study instruments (eg, questionnaires, laboratory tests) along with their reliability and validity, if known. Reference to where data collection forms can be found, if not in the protocol | 12-14 |
|                                                    | 18b | Plans to promote participant retention and complete follow-up, including list of any outcome data to be collected for participants who discontinue or deviate from intervention protocols                                                                                                                                                                                                                    | 12-14 |
| Data management                                    | 19  | Plans for data entry, coding, security, and storage, including any related processes to promote data quality (eg, double data entry; range checks for data values). Reference to where details of data management procedures can be found, if not in the protocol                                                                                                                                            | 16    |
| Statistical methods                                | 20a | Statistical methods for analysing primary and secondary outcomes. Reference to where other details of the statistical analysis plan can be found, if not in the protocol                                                                                                                                                                                                                                     | 17,18 |
|                                                    | 20b | Methods for any additional analyses (eg, subgroup and adjusted analyses)                                                                                                                                                                                                                                                                                                                                     | 17,18 |
|                                                    | 20c | Definition of analysis population relating to protocol non-adherence (eg, as randomised analysis), and any statistical methods to handle missing data (eg, multiple imputation)                                                                                                                                                                                                                              | 17,18 |
| Methods: Monitoring                                |     |                                                                                                                                                                                                                                                                                                                                                                                                              |       |
| Data monitoring                                    | 21a | Composition of data monitoring committee (DMC); summary of its role and reporting structure; statement of whether it is independent from the sponsor and competing interests; and reference to where further details about its charter can be found, if not in the protocol. Alternatively, an explanation of why a DMC is not needed                                                                        | 16-17 |
|                                                    | 21b | Description of any interim analyses and stopping guidelines, including who will have access to these interim results and make the final decision to terminate the trial                                                                                                                                                                                                                                      | 16-17 |
| Harms                                              | 22  | Plans for collecting, assessing, reporting, and managing solicited and spontaneously reported adverse events and other unintended effects of trial interventions or trial conduct                                                                                                                                                                                                                            | 15    |
| Auditing                                           | 23  | Frequency and procedures for auditing trial conduct, if any, and whether the process will be independent from investigators and the sponsor                                                                                                                                                                                                                                                                  | 16-17 |
| Ethics and dissemination                           |     |                                                                                                                                                                                                                                                                                                                                                                                                              |       |
| Research ethics approval                           | 24  | Plans for seeking research ethics committee/institutional review board (REC/IRB) approval                                                                                                                                                                                                                                                                                                                    | 18,19 |
| Protocol amendments                                | 25  | Plans for communicating important protocol modifications (eg, changes to eligibility criteria, outcomes, analyses) to                                                                                                                                                                                                                                                                                        | 18,19 |

|                               |     |                                                                                                                                                                                                                                                                                     |       |
|-------------------------------|-----|-------------------------------------------------------------------------------------------------------------------------------------------------------------------------------------------------------------------------------------------------------------------------------------|-------|
|                               |     | relevant parties (eg, investigators, REC/IRBs, trial participants, trial registries, journals, regulators)                                                                                                                                                                          |       |
| Consent or assent             | 26a | Who will obtain informed consent or assent from potential trial participants or authorised surrogates, and how (see Item 32)                                                                                                                                                        | 18,19 |
|                               | 26b | Additional consent provisions for collection and use of participant data and biological specimens in ancillary studies, if applicable                                                                                                                                               | 18,19 |
| Confidentiality               | 27  | How personal information about potential and enrolled participants will be collected, shared, and maintained in order to protect confidentiality before, during, and after the trial                                                                                                | 18,19 |
| Declaration of interests      | 28  | Financial and other competing interests for principal investigators for the overall trial and each study site                                                                                                                                                                       | 27    |
| Access to data                | 29  | Statement of who will have access to the final trial dataset, and disclosure of contractual agreements that limit such access for investigators                                                                                                                                     | 16-17 |
| Ancillary and post-trial care | 30  | Provisions, if any, for ancillary and post-trial care, and for compensation to those who suffer harm from trial participation                                                                                                                                                       | 18,19 |
| Dissemination policy          | 31a | Plans for investigators and sponsor to communicate trial results to participants, healthcare professionals, the public, and other relevant groups (eg, via publication, reporting in results databases, or other data sharing arrangements), including any publication restrictions | 18,19 |
|                               | 31b | Authorship eligibility guidelines and any intended use of professional writers                                                                                                                                                                                                      | 18,19 |
|                               | 31c | Plans, if any, for granting public access to the full protocol, participant-level dataset, and statistical code                                                                                                                                                                     | 18,19 |
| Appendices                    |     |                                                                                                                                                                                                                                                                                     |       |
| Informed consent materials    | 32  | Model consent form and other related documentation given to participants and authorised surrogates                                                                                                                                                                                  | 31-35 |
|                               | 33  | Plans for collection, laboratory evaluation, and storage of biological specimens for genetic or molecular analysis in the current trial and for future use in ancillary studies, if applicable                                                                                      | NA    |

# BMJ Open

## Effectiveness and cost-effectiveness of a virtual community of practice to improve the empowerment of patients with ischaemic heart disease: study protocol of a randomised controlled trial.

|                               |                                                                                                                                                                                                                                                                                                                                                                                                                                                                                                                                                                                                                                                                                                                                                                                                                                                                                                                                                                                                                                                                                                                                                                                                                                                                                                                                                                                                                                                                                                                                                                                                                                                                                                                                                                                                                                                                                                                                                                                                                                                                                                                                                                                                                                                  |
|-------------------------------|--------------------------------------------------------------------------------------------------------------------------------------------------------------------------------------------------------------------------------------------------------------------------------------------------------------------------------------------------------------------------------------------------------------------------------------------------------------------------------------------------------------------------------------------------------------------------------------------------------------------------------------------------------------------------------------------------------------------------------------------------------------------------------------------------------------------------------------------------------------------------------------------------------------------------------------------------------------------------------------------------------------------------------------------------------------------------------------------------------------------------------------------------------------------------------------------------------------------------------------------------------------------------------------------------------------------------------------------------------------------------------------------------------------------------------------------------------------------------------------------------------------------------------------------------------------------------------------------------------------------------------------------------------------------------------------------------------------------------------------------------------------------------------------------------------------------------------------------------------------------------------------------------------------------------------------------------------------------------------------------------------------------------------------------------------------------------------------------------------------------------------------------------------------------------------------------------------------------------------------------------|
| Journal:                      | <i>BMJ Open</i>                                                                                                                                                                                                                                                                                                                                                                                                                                                                                                                                                                                                                                                                                                                                                                                                                                                                                                                                                                                                                                                                                                                                                                                                                                                                                                                                                                                                                                                                                                                                                                                                                                                                                                                                                                                                                                                                                                                                                                                                                                                                                                                                                                                                                                  |
| Manuscript ID                 | bmjopen-2020-037374.R1                                                                                                                                                                                                                                                                                                                                                                                                                                                                                                                                                                                                                                                                                                                                                                                                                                                                                                                                                                                                                                                                                                                                                                                                                                                                                                                                                                                                                                                                                                                                                                                                                                                                                                                                                                                                                                                                                                                                                                                                                                                                                                                                                                                                                           |
| Article Type:                 | Protocol                                                                                                                                                                                                                                                                                                                                                                                                                                                                                                                                                                                                                                                                                                                                                                                                                                                                                                                                                                                                                                                                                                                                                                                                                                                                                                                                                                                                                                                                                                                                                                                                                                                                                                                                                                                                                                                                                                                                                                                                                                                                                                                                                                                                                                         |
| Date Submitted by the Author: | 24-Jun-2020                                                                                                                                                                                                                                                                                                                                                                                                                                                                                                                                                                                                                                                                                                                                                                                                                                                                                                                                                                                                                                                                                                                                                                                                                                                                                                                                                                                                                                                                                                                                                                                                                                                                                                                                                                                                                                                                                                                                                                                                                                                                                                                                                                                                                                      |
| Complete List of Authors:     | <p>GONZALEZ-GONZALEZ, ANA; Goethe-Universitat Frankfurt am Main Institut fur Allgemeinmedizin; Gerencia Asistencial de Atención Primaria, Servicio Madrileño de Madrid, Red de Investigación en Servicios de Salud en Enfermedades Crónicas (REDISSEC)</p> <p>Perestelo-Pérez, Lilisbeth; Servicio de Evaluación y Planificación del Servicio Canario de la Salud; Red de Investigación en Servicios de Salud en Enfermedades Crónicas (REDISSEC)</p> <p>Koatz, Débora; Avedis Donabedian Research Institute (FAD); Red de Investigación en Servicios de Salud en Enfermedades Crónicas (REDISSEC)</p> <p>Ballester, Marta; Avedis Donabedian Research Institute; Red de Investigación en Servicios de Salud en Enfermedades Crónicas (REDISSEC),</p> <p>Pacheco-Huergo, Valeria; Centro de Atención Primaria Turó, Instituto Catalán de la Salud; Avedis Donabedian Research Institute (FAD)</p> <p>Ramos-García, Vanesa; Fundación Canaria Instituto de Investigación Sanitaria de Canarias (FISC)</p> <p>Torres-Castaño, Alezandra; Fundación Canaria Instituto de Investigación Sanitaria de Canarias (FISC)</p> <p>Rivero-Santana, Amado ; Servicio de Evaluación y Planificación del Servicio Canario de la Salud; Red de Investigación en Servicios de Salud en Enfermedades Crónicas (REDISSEC)</p> <p>Toledo-Chávarri, Ana; Fundación Canaria Instituto de Investigación Sanitaria de Canarias (FISC); Red de Investigación en Servicios de Salud en Enfermedades Crónicas (REDISSEC)</p> <p>Valcárcel-Nazco, Cristina; Fundación Canaria Instituto de Investigación Sanitaria de Canarias (FISC)</p> <p>Mateos-Rodilla, Juana; Escuela Madrileña de Salud, Dirección General de Humanización y Atención al Paciente</p> <p>Obaya-Rebollar, Juan; Centro de Salud Chopera, Gerencia Asistencial de Atención Primaria</p> <p>García-García, Javier; Unidad de Calidad y Seguridad del Paciente. Hospital Universitario Nuestra Señora de Candelaria</p> <p>Díaz-Sánchez, Santiago; Centro de Salud Pintores, Gerencia Asistencial de Atención Primaria</p> <p>Morales-Cobos, Luis; Centro de Salud Las Américas, Gerencia Asistencial de Atención Primaria</p> <p>Bosch-Fontcuberta, Josep; Instituto Catalán de la Salud, Centro de</p> |

|                                 |                                                                                                                                                                                                                                                                                                                                                                                                                                                                                                                                                                                                                                                                                                                                                                                                                                                                                                                                                                                                                                                                                     |
|---------------------------------|-------------------------------------------------------------------------------------------------------------------------------------------------------------------------------------------------------------------------------------------------------------------------------------------------------------------------------------------------------------------------------------------------------------------------------------------------------------------------------------------------------------------------------------------------------------------------------------------------------------------------------------------------------------------------------------------------------------------------------------------------------------------------------------------------------------------------------------------------------------------------------------------------------------------------------------------------------------------------------------------------------------------------------------------------------------------------------------|
|                                 | Atención Primaria Encants; Universitat Autònoma de Barcelona, Departament de Medicina Àrea de Medicina Vallejo-Camazón, Nuria; Hospital Germans Trias i Pujol Rodríguez-Almodovar, Ana; UGC Cardiología, Hospital Universitario Reina Sofía del Castillo, José; Hospital San Juan de Dios, Cardiovascular Area Muñoz-Balsa, Marcos; Unidad de Apoyo Técnico, Gerencia Asistencial Atención Primaria, Servicio Madrileño de Salud del Rey-Granado, Yolanda; Unidad de Apoyo Técnico, Gerencia Asistencial Atención Primaria, Servicio Madrileño de Salud Garrido-Elustondo, Sofía; Comunidad de Madrid Consejería de Sanidad, Centre Family and Community Care Teaching Multiprofessional Unit Tello-Bernabé, María-Eugenia; Centro de Salud El Naranjo, Gerencia Asistencial Atención Primaria, Servicio Madrileño de Salud Ramírez-Puerta, Ana; Unidad de Apoyo Técnico, Gerencia Asistencial Atención Primaria, Servicio Madrileño de Salud Orrego, Carola; Avedis Donabedian Research Institute; Red de Investigación en Servicios de Salud en Enfermedades Crónicas (REDISSEC), |
| <b>Primary Subject Heading</b>: | Cardiovascular medicine                                                                                                                                                                                                                                                                                                                                                                                                                                                                                                                                                                                                                                                                                                                                                                                                                                                                                                                                                                                                                                                             |
| Secondary Subject Heading:      | General practice / Family practice                                                                                                                                                                                                                                                                                                                                                                                                                                                                                                                                                                                                                                                                                                                                                                                                                                                                                                                                                                                                                                                  |
| Keywords:                       | Coronary heart disease < CARDIOLOGY, GENERAL MEDICINE (see Internal Medicine), GERIATRIC MEDICINE, Adult cardiology < CARDIOLOGY                                                                                                                                                                                                                                                                                                                                                                                                                                                                                                                                                                                                                                                                                                                                                                                                                                                                                                                                                    |
|                                 |                                                                                                                                                                                                                                                                                                                                                                                                                                                                                                                                                                                                                                                                                                                                                                                                                                                                                                                                                                                                                                                                                     |

SCHOLARONE™  
Manuscripts



I, the Submitting Author has the right to grant and does grant on behalf of all authors of the Work (as defined in the below author licence), an exclusive licence and/or a non-exclusive licence for contributions from authors who are: i) UK Crown employees; ii) where BMJ has agreed a CC-BY licence shall apply, and/or iii) in accordance with the terms applicable for US Federal Government officers or employees acting as part of their official duties; on a worldwide, perpetual, irrevocable, royalty-free basis to BMJ Publishing Group Ltd ("BMJ") its licensees and where the relevant Journal is co-owned by BMJ to the co-owners of the Journal, to publish the Work in this journal and any other BMJ products and to exploit all rights, as set out in our [licence](#).

The Submitting Author accepts and understands that any supply made under these terms is made by BMJ to the Submitting Author unless you are acting as an employee on behalf of your employer or a postgraduate student of an affiliated institution which is paying any applicable article publishing charge ("APC") for Open Access articles. Where the Submitting Author wishes to make the Work available on an Open Access basis (and intends to pay the relevant APC), the terms of reuse of such Open Access shall be governed by a Creative Commons licence – details of these licences and which [Creative Commons](#) licence will apply to this Work are set out in our licence referred to above.

Other than as permitted in any relevant BMJ Author's Self Archiving Policies, I confirm this Work has not been accepted for publication elsewhere, is not being considered for publication elsewhere and does not duplicate material already published. I confirm all authors consent to publication of this Work and authorise the granting of this licence.



1  
2  
3 1 **TITLE**  
4

5 2 Effectiveness and cost-effectiveness of a virtual community of practice to improve the  
6  
7 3 empowerment of patients with ischaemic heart disease: study protocol of a randomised  
8  
9 4 controlled trial.  
10  
11

12 5  
13  
14 6 **AUTHORS**  
15

16 7 Ana Isabel González-González

17  
18 8 Institute of General Practice, Johann Wolfgang Goethe University, Frankfurt / Main, GERMANY.

19  
20 9 Gerencia Asistencial Atención Primaria, Servicio Madrileño de Salud, Madrid, SPAIN

21  
22 10 Red de Investigación en Servicios de Salud en Enfermedades Crónicas (REDISSEC), Madrid, SPAIN.

23  
24 11 Email: [GonzalezGonzalez@allgemeinmedizin.uni-frankfurt.de](mailto:GonzalezGonzalez@allgemeinmedizin.uni-frankfurt.de)  
25  
26  
27

28 12

29  
30 13 Lilisbeth Perestelo-Pérez

31  
32 14 Servicio de Evaluación y Planificación del Servicio Canario de la Salud, Tenerife, SPAIN

33  
34 15 Red de Investigación en Servicios de Salud en Enfermedades Crónicas (REDISSEC), Madrid, SPAIN.

35  
36 16 Email: [lilisbeth.peresteloperez@sescs.es](mailto:lilisbeth.peresteloperez@sescs.es)  
37  
38

39 17

40  
41 18 Débora Koatz

42  
43 19 Avedis Donabedian Research Institute (FAD), Barcelona, SPAIN

44  
45 20 Universitat Autònoma de Barcelona, Barcelona, SPAIN

46  
47 21 Red de Investigación en Servicios de Salud en Enfermedades Crónicas (REDISSEC), Madrid, SPAIN.

48  
49 22 Email: [dkoatz@fadq.org](mailto:dkoatz@fadq.org)  
50  
51

52 23

53  
54 24 Marta Ballester

55  
56 25 Avedis Donabedian Research Institute (FAD), Barcelona, SPAIN

57  
58 26 Universitat Autònoma de Barcelona, Barcelona, SPAIN  
59  
60

- 1  
2  
3 27 Red de Investigación en Servicios de Salud en Enfermedades Crónicas (REDISSEC), Madrid, SPAIN.  
4  
5 28 Email: [mballester@fadq.org](mailto:mballester@fadq.org)  
6  
7 29  
8  
9 30 Valeria Pacheco-Huergo  
10  
11 31 Centro de Atención Primaria Turó, Instituto Catalán de la Salud, Barcelona, SPAIN  
12  
13 32 Avedis Donabedian Research Institute (FAD), Barcelona, SPAIN  
14  
15 33 Email: [vpachecohuergo@gmail.com](mailto:vpachecohuergo@gmail.com)  
16  
17 34  
18  
19 35 Vanesa Ramos-García  
20  
21 36 Fundación Canaria Instituto de Investigación Sanitaria de Canarias (FIISC), Tenerife, SPAIN  
22  
23 37 Email: [vanesa.ramosgarcia@sescs.es](mailto:vanesa.ramosgarcia@sescs.es)  
24  
25 38  
26  
27 39 Alezandra Torres-Castaño  
28  
29 40 Fundación Canaria Instituto de Investigación Sanitaria de Canarias (FIISC), Tenerife, SPAIN  
30  
31 41 Email: [atorrcas@sescs.es](mailto:atorrcas@sescs.es)  
32  
33 42  
34  
35 43 Amado Rivero-Santana  
36  
37 44 Servicio de Evaluación y Planificación del Servicio Canario de la Salud, Tenerife, SPAIN  
38  
39 45 Red de Investigación en Servicios de Salud en Enfermedades Crónicas (REDISSEC), Madrid, SPAIN  
40  
41 46 Email: [amado.riverosantana@sescs.es](mailto:amado.riverosantana@sescs.es)  
42  
43 47  
44  
45 48 Ana Toledo-Chavarri  
46  
47 49 Fundación Canaria Instituto de Investigación Sanitaria de Canarias (FIISC), Tenerife, SPAIN  
48  
49 50 Red de Investigación en Servicios de Salud en Enfermedades Crónicas (REDISSEC), Madrid, SPAIN  
50  
51 51 Email: [anatoledochavarri@sescs.es](mailto:anatoledochavarri@sescs.es)  
52  
53 52  
54  
55  
56  
57  
58  
59  
60

- 1  
2  
3 53 Cristina Valcarcel Nazco  
4  
5 54 Fundación Canaria Instituto de Investigación Sanitaria de Canarias (FIISC), Tenerife, SPAIN  
6  
7 55 Email: [cristina.valcarcelnazco@sescs.es](mailto:cristina.valcarcelnazco@sescs.es)  
8  
9  
10 56  
11  
12 57 Juana Mateos-Rodilla  
13  
14 58 Escuela Madrileña de Salud, Dirección General de Humanización y Atención al Paciente, Madrid,  
15  
16 59 SPAIN  
17  
18 60 Email: [juana.mateos@salud.madrid.org](mailto:juana.mateos@salud.madrid.org)  
19  
20  
21 61  
22  
23 62 Juan Carlos Obaya-Rebollar  
24  
25 63 Centro de Salud Chopera, Gerencia Asistencial de Atención Primaria, Madrid, SPAIN  
26  
27 64 Email: [juancarlos.obaya@salud.madrid.org](mailto:juancarlos.obaya@salud.madrid.org)  
28  
29  
30 65  
31  
32 66 Javier García-García  
33  
34 67 Unidad de Calidad y Seguridad del Paciente. Hospital Universitario Nuestra Señora de Candelaria,  
35  
36 68 Tenerife, Canarias, SPAIN  
37  
38 69 Email: [chaviergg@gmail.com](mailto:chaviergg@gmail.com)  
39  
40  
41 70  
42  
43 71 Santiago Díaz-Sánchez  
44  
45 72 Centro de Salud Pintores, Gerencia Asistencial de Atención Primaria, Madrid, SPAIN  
46  
47 73 Email: [sdiazs@salud.madrid.org](mailto:sdiazs@salud.madrid.org)  
48  
49  
50 74  
51  
52 75 Luis Morales-Cobos  
53  
54 76 Centro de Salud Las Américas, Gerencia Asistencial de Atención Primaria, Madrid, SPAIN  
55  
56 77 Email: [luis.morales@salud.madrid.org](mailto:luis.morales@salud.madrid.org)  
57  
58  
59 78  
60

- 1  
2  
3 79 Josep-María Bosch-Fontcuberta  
4  
5 80 Centro de Atención Primaria Encants, Instituto Catalán de la Salud, Barcelona, SPAIN  
6  
7 81 Departament de Medicina Àrea de Medicina, Universitat Autònoma de Barcelona, SPAIN  
8  
9  
10 82 Email: [boschfontcuberta@gmail.com](mailto:boschfontcuberta@gmail.com)  
11  
12 83  
13  
14 84 Nuria Vallejo-Camazón  
15  
16 85 Hospital Germans Trias i Pujol, Badalona, SPAINol  
17  
18 86 Email: [nvallejo73@hotmail.com](mailto:nvallejo73@hotmail.com)  
19  
20  
21 87  
22  
23 88 Ana Rodríguez-Almodóvar  
24  
25 89 UGC Cardiología, Hospital Universitario Reina Sofía, Córdoba, SPAIN  
26  
27 90 Email: [anarodriguezal@yahoo.es](mailto:anarodriguezal@yahoo.es)  
28  
29  
30 91  
31  
32 92 José Carlos del Castillo  
33  
34 93 Área de prevención y medicina cardiovascular. Hospital San Juan de Dios, Tenerife, SPAIN  
35  
36 94 Email: [jcasrodc@gmail.com](mailto:jcasrodc@gmail.com)  
37  
38  
39 95  
40  
41 96 Marcos Muñoz-Balsa  
42  
43 97 Unidad de Apoyo Técnico, Gerencia Asistencial Atención Primaria, Servicio Madrileño de Salud,  
44  
45 98 Madrid, SPAIN  
46  
47 99 Email: [marcosjose.munoz@salud.madrid.org](mailto:marcosjose.munoz@salud.madrid.org)  
48  
49  
50 100  
51  
52 101 Yolanda del Rey-Granado  
53  
54 102 Unidad de Apoyo Técnico, Gerencia Asistencial Atención Primaria, Servicio Madrileño de Salud,  
55  
56 103 Madrid, SPAIN  
57  
58  
59 104 [yolandadel.rey@salud.madrid.org](mailto:yolandadel.rey@salud.madrid.org)  
60

- 1  
2  
3 105  
4  
5 106 Sofía Garrido-Elustondo  
6  
7 107 Unidad Docente Multiprofesional de Atención Familiar y Comunitaria Sureste, Unidad de Apoyo a la  
8  
9 108 Investigación, Gerencia Asistencial Atención Primaria, Servicio Madrileño de Salud, Madrid, SPAIN  
10  
11 109 Red de Investigación en Servicios de Salud en Enfermedades Crónicas (REDISSEC), Madrid, SPAIN.  
12  
13  
14 110 Email: [sgarrido@salud.madrid.org](mailto:sgarrido@salud.madrid.org)  
15  
16 111  
17  
18 112 María-Eugenia Tello-Bernabé  
19  
20 113 Centro de Salud El Naranjo, Gerencia Asistencial Atención Primaria, Servicio Madrileño de Salud,  
21  
22 114 Madrid, SPAIN  
23  
24 115 Red de Investigación en Servicios de Salud en Enfermedades Crónicas (REDISSEC), Madrid, SPAIN.  
25  
26 116 Email: [mariaeugenia.tello@salud.madrid.org](mailto:mariaeugenia.tello@salud.madrid.org)  
27  
28 117  
29  
30 118 Ana Belén Ramírez-Puerta  
31  
32 119 Unidad de Apoyo Técnico, Gerencia Asistencial Atención Primaria, Servicio Madrileño de Salud,  
33  
34 120 Madrid, SPAIN  
35  
36 121 Email: [anabelen.ramirez@salud.madrid.org](mailto:anabelen.ramirez@salud.madrid.org)  
37  
38  
39 122  
40  
41 123 Carola Orrego  
42  
43 124 Avedis Donabedian Research Institute (FAD), Barcelona, SPAIN  
44  
45 125 Universitat Autònoma de Barcelona, Barcelona, SPAIN  
46  
47 126 Red de Investigación en Servicios de Salud en Enfermedades Crónicas (REDISSEC), Madrid, SPAIN.  
48  
49 127 Email: [corrego@fadq.org](mailto:corrego@fadq.org)  
50  
51  
52 128  
53  
54 129 **CORRESPONDING AUTHOR**  
55  
56  
57 130 Ana Isabel González-González  
58  
59  
60

- 1  
2  
3 131 Institute of General Practice, Johann Wolfgang Goethe University, Frankfurt / Main, GERMANY.  
4  
5 132 Email: GonzalezGonzalez@allgemeinmedizin.uni-frankfurt.de  
6  
7  
8  
9  
10  
11  
12  
13  
14  
15  
16  
17  
18  
19  
20  
21  
22  
23  
24  
25  
26  
27  
28  
29  
30  
31  
32  
33  
34  
35  
36  
37  
38  
39  
40  
41  
42  
43  
44  
45  
46  
47  
48  
49  
50  
51  
52  
53  
54  
55  
56  
57  
58  
59  
60

For peer review only

1  
2  
3 133 **ABSTRACT**

4  
5 134 **Introduction**

6  
7 135 Virtual Communities of Practice (VCoP) or knowledge-sharing virtual communities offer ubiquitous  
8  
9 136 access to information and exchange possibilities for people in similar situations, which might be  
10  
11 137 especially valuable for the self-management of patients with chronic diseases. In view of the  
12  
13 138 scarce evidence on the clinical and economic impact of these interventions on chronic conditions,  
14  
15 139 we aim to evaluate the effectiveness and cost-effectiveness of a VCoP in the improvement of the  
16  
17 140 activation and other patient empowerment measures in patients with ischemic heart disease  
18  
19 141 (IHD).

20  
21  
22  
23 142 **Methods and analysis**

24  
25 143 A pragmatic randomised controlled trial will be performed in Catalonia, Madrid and Canary  
26  
27 144 Islands, Spain. Two hundred fifty patients with a recent diagnosis of IHD attending the  
28  
29 145 participating centres will be selected and randomised to intervention or control group. The  
30  
31 146 intervention group will be offered participation for 12 months in a VCoP based on a gamified web  
32  
33 147 2.0 platform where there is interaction with other patients and a multidisciplinary professional  
34  
35 148 team. Intervention and control groups will receive usual care. The primary outcome will be  
36  
37 149 measured with the Patient Activation Measure questionnaire at baseline, 6, 12 and 18 months.  
38  
39 150 Secondary outcomes will include: clinical variables; knowledge (Questionnaire of Cardiovascular  
40  
41 151 Risk Factors), attitudes (Self-efficacy Managing Chronic Disease Scale), adherence to  
42  
43 152 Mediterranean diet (Mediterranean Diet Questionnaire), level of physical activity (International  
44  
45 153 Physical Activity Questionnaire), depression (Patient Health Questionnaire), anxiety (Hospital  
46  
47 154 Anxiety Scale-A), medication adherence (Adherence to Refill Medication Scale), quality of life (EQ-  
48  
49 155 5D-5L) and health resources use. Data will be collected from self-reported questionnaires and  
50  
51 156 electronic medical records.

52  
53  
54  
55  
56  
57 157 **Ethics and dissemination**  
58  
59  
60

1  
2  
3 158 The trial was approved by Clinical Research Ethics Committee of Gregorio Marañón University  
4  
5 159 Hospital in Madrid, Nuestra Señora de Candelaria University Hospital in Santa Cruz de Tenerife and  
6  
7 160 IDIAP Jordi Gol in Barcelona. The results will be disseminated through workshops, policy briefs,  
8  
9 161 peer-reviewed publications, local/international conferences.  
10  
11  
12 162 **Registration**  
13  
14 163 ClinicalTrials.gov Identifier: NCT03959631  
15  
16  
17  
18  
19  
20  
21  
22  
23  
24  
25  
26  
27  
28  
29  
30  
31  
32  
33  
34  
35  
36  
37  
38  
39  
40  
41  
42  
43  
44  
45  
46  
47  
48  
49  
50  
51  
52  
53  
54  
55  
56  
57  
58  
59  
60

For peer review only



1  
2  
3 164 **Strengths and limitations of this study**  
4

- 5 165 - We will experimentally test an innovative learning intervention based on a VCoP for patient  
6  
7 166 empowerment, for which the literature lacks experimental evaluations.  
8  
9 167 - VCoP can enhance communication between community members in different geographic  
10  
11 168 locations and even from different time zones.  
12  
13 169 - Participation rate can be low as similar experiences have shown; we will include the active role  
14  
15 170 of a community manager, weekly emails as reminders and a gamified competitive score  
16  
17 171 system to boost participation.  
18  
19 172 - Since all randomised patients will be required a minimum level of digital literacy so, the results  
20  
21 173 could not be generalized to all patients.  
22  
23 174 - Patients belonging to the control group and intervention group could receive different type of  
24  
25 175 self-management support depending on the centres where the care is provided.  
26  
27  
28  
29  
30  
31  
32  
33  
34  
35  
36  
37  
38  
39  
40  
41  
42  
43  
44  
45  
46  
47  
48  
49  
50  
51  
52  
53  
54  
55  
56  
57  
58  
59  
60

## 176 INTRODUCTION

177 In Western countries, ischemic heart disease (IHD) is a major public concern as, and although  
178 mortality from IHD has been significantly reduced since 2000, it remains as a leading cause of  
179 death (50.6 deaths / 100,000 inhabitants in Spain and 106.6 deaths / 100,000 inhabitants in the  
180 United States in 2016) (1). In Spain 32,325 people died from IHD in 2017, according to the National  
181 Institute of Statistics (2). Patients with IHD may have a stable disease or an acute coronary  
182 syndrome, which could present with or without ST segment elevation. In addition, some patients  
183 may have left ventricular dysfunction and heart failure (3–5).

184 For the treatment of IHD, in addition to the pharmacological treatment and, if necessary,  
185 interventional procedures, it is essential to manage cardiovascular risk factors such as smoking  
186 cessation, blood pressure, lipids and diabetes control, adherence to a Mediterranean diet, active  
187 lifestyle and prevent obesity. Moreover, for the secondary prevention of IHD, cardiac  
188 rehabilitation programs are beneficial for patients, improving exercise capacity, quality of life and  
189 psychological well-being (6–8). The active role of the patient is crucial along with the support of  
190 health care providers to achieve a successful secondary prevention of IHD.

191 The empowerment and self-management of patients with chronic conditions is becoming one of  
192 the main objectives in health care, especially in primary care (PC). The European EMPATHiE project  
193 (9) defines the empowered patient as one who "has control over the management of the  
194 conditions of their daily life, actively tries to improve his/her quality of life and has the necessary  
195 knowledge, skills, attitudes and self-perception to adjust his/her behaviour and work in  
196 partnership with others when necessary, to achieve optimal well-being".

197 One of the domains included in patient empowerment is the level of patient activation. Patient  
198 activation incorporates a combination of knowledge about the illness, ability and self-confidence  
199 in the management of the medical conditions (10). It is associated with healthy behaviours, good  
200 chronic disease metrics, and reduced morbidity and unplanned hospitalizations (11–15).

1  
2  
3 201 Interventions aimed at empowerment are intended to provide patients (and their informal  
4  
5 202 caregivers, when appropriate) with the ability to participate in decisions related to their illness to  
6  
7 203 the extent they wish, develop self-confidence, self-esteem and skills to face the physical,  
8  
9 204 emotional and social impact of the disease in their daily lives (16,17).  
10  
11 205 Virtual Communities of Practice (VCoP) offer ubiquitous access to information and exchange  
12  
13 206 possibilities for people in similar situations, which is especially valuable in patients with chronic  
14  
15 207 diseases. A CoP is a group of individuals who participate in a common activity and experience and  
16  
17 208 create a shared identity and deepen their knowledge and experience in the area through a  
18  
19 209 continuous interaction that strengthens their relationships (18). In this context, a group of patients  
20  
21 210 with the same illness such as IHD, could benefit from an intervention of these characteristics  
22  
23 211 where they can share resources and information in addition to having the possibility of receiving  
24  
25 212 peer and professional support.  
26  
27 213 There is little research on the effect of VCoP in terms of their clinical and economic impact and on  
28  
29 214 the empowerment of patients with chronic diseases, especially with IHD (19,20). We propose to  
30  
31 215 address this gap and, thus, present the protocol of a randomised controlled trial, which mainly  
32  
33 216 aims to evaluate the effectiveness and cost-effectiveness of a VCoP to improve the activation and  
34  
35 217 other measures related with patient empowerment in patients with IHD.  
36  
37  
38  
39  
40

41 218

42  
43 219 **METHODS AND ANALYSIS**44  
45 220 This protocol has been prepared in accordance with the Standard Protocol Items:46  
47 221 Recommendations for Interventional Trials (SPIRIT) checklist (Additional file 1) (21).48  
49 222 [About here link to Additional file 1 on SPIRIT checklist].  
50  
5152  
53 223 **Study design**54  
55 224 We plan a pragmatic randomised controlled multicentre trial (*e-mpodera*<sup>2</sup>), with two parallel arms  
56  
57 225 and 18-month follow-up.  
5859 226 **Study setting**  
60

1  
2  
3 227 The setting of the intervention will be a virtual setting. Usual care will be provided at primary care  
4  
5 228 practices (PCPs) and outpatient specialized clinics in Catalonia, Madrid and Canary Islands in Spain.  
6

7  
8 229 **Eligibility criteria**

9  
10 230 Patients with a recent diagnosis of IHD will be screened for the following eligibility criteria:

11  
12 231 *Inclusion criteria*

13  
14 232 Age  $\geq$  18 years; active diagnosis in the electronic medical record (EMR) of IHD (ICPC-2 codes K74-

15  
16 233 76; or ICD-9 codes 410, 411, 411.8, 413, 414 y 414.9) in the year prior to inclusion in the study;

17  
18 234 Internet at home or Smartphone; be able to follow the requirements of the study (e.g. digital

19  
20 235 literacy); have signed the informed consent (Additional file 2).

21  
22 236 [About here link to Additional file 2 on Informed consent].

23  
24  
25 237 *Exclusion criteria*

26  
27 238 Institutionalized, terminal illness, physical or mental disability that limit the ability to answer the

28  
29 239 questionnaires or when telephone / email contact is not available in the PCPs/hospitals'

30  
31 240 databases.

32  
33  
34 241 **Interventions**

35  
36 242 *VCoP group*

37  
38 243 "e-mpodera<sup>2</sup>" is a gamified VCoP on a web 2.0 platform based on the exchange of experiences and

39  
40 244 knowledge through participatory learning (22). It will provide educational, playful elements and

41  
42 245 tools that will facilitate the learning and transfer of knowledge and attitudes among patients with

43  
44 246 IHD and with health care professionals. The structure and components will be designed according

45  
46 247 to the needs and specifications of patients with IHD recruited in an earlier stage using a co-

47  
48 248 creation methodology with face-to-face sessions and virtual activities (forums and interactions)

49  
50 249 that incorporated a personalized itinerary – Patient Journey Map - (published elsewhere) and with

51  
52 250 the use of various types of content including readings, resources, videos, games and virtual

53  
54 251 sessions (22).  
55  
56  
57  
58  
59  
60

1  
2  
3 252 Patients will have access to multidisciplinary professional support as needed and according to  
4  
5 253 what was identified in the content-design stage (published elsewhere) will potentially include  
6  
7 254 general practitioners, cardiologists, psychologists, self-care and self-management specialists,  
8  
9 255 nutritionist and others as necessary. Various thematic areas related to the empowerment of  
10  
11 256 patients and self-care of IHD will be progressively covered: health competence, self-efficacy and  
12  
13 257 activation improvement, behavioural changes, lifestyle / signs / symptoms monitoring, technical  
14  
15 258 skills, chronic disease acceptance and shared decision-making. Special emphasis will be given to  
16  
17 259 the changes recommended by European Guidelines (23) for self-management of IHD including  
18  
19 260 monitoring changes in symptoms, stress management, mental health and adherence to  
20  
21 261 medication, diet, exercise plans, sodium cholesterol, and alcohol restriction and tobacco  
22  
23 262 abstinence. The active role of a community manager, weekly emails as reminders and a gamified  
24  
25 263 competitive score system will boost participation.  
26  
27  
28

#### 29 264 *Usual care group*

30  
31 265 Patients allocated to both the intervention and the control group will continue with their usual  
32  
33 266 self- and professional care according to the local guidelines (3–5).  
34  
35

#### 36 267 **Outcomes measures**

##### 37 268 *Primary outcome*

38  
39 269 The primary outcome will be the patient activation level using the Patient Activation Measure  
40  
41 270 (PAM) questionnaire that assesses activation in patients with chronic diseases (12). The  
42  
43 271 questionnaire consists of 13 items that assesses knowledge, skills and confidence of people for  
44  
45 272 self-care, measured by a Likert 1-4 scale with a total score between 0 and 100 (100 identifies the  
46  
47 273 patients with the highest level of activation). The Spanish translated version has been validated in  
48  
49 274 patients with chronic diseases and has demonstrated a similar behaviour to the original  
50  
51 275 instrument with good validity and reliability properties (24). It has been used in previous studies  
52  
53 276 by this research team (25).  
54  
55  
56

##### 57 277 *Secondary outcomes*

58  
59  
60

- 1  
2  
3 278 For the effectiveness of the VCoP, we will record the following secondary measures:  
4  
5 279 - Clinical variables such as body mass index, lipid profile (HDL-C, LDL-C), smoking status, number  
6  
7 280 and frequency of angina episodes will be collected through researcher developed online  
8  
9 281 questionnaire that will be fulfilled by health care professionals combined with information  
10  
11 282 from the EMR.  
12  
13  
14 283 - Knowledge about the disease will be assessed through a self-administered online  
15  
16 284 questionnaire based on the Questionnaire of Cardiovascular Risk Factors (Q-FARC) (26–28),  
17  
18 285 previously translated from the English version and adapted to the Spanish population.  
19  
20 286 - Patients' attitudes to self-care will be evaluated using the self-administered Self-efficacy  
21  
22 287 Managing Chronic Disease Scale (SMCDS) (29), translated into Spanish (30) and used in  
23  
24 288 patients with heart failure (31).  
25  
26  
27 289 - Adherence to Mediterranean diet will be assessed with the Mediterranean diet questionnaire  
28  
29 290 (32), validated in the Spanish population in the PREDIMED study (33–35).  
30  
31  
32 291 - Physical activity will be measured using the International Physical Activity Questionnaire  
33  
34 292 (IPAQ), translated and adapted to the Spanish language (36). Patients will be classified into  
35  
36 293 three categories (low, medium and high) according to the index of physical activity (product of  
37  
38 294 the intensity - in METS - by the frequency,) and the duration of the activity.  
39  
40  
41 295 - Depressive disorders will be detected by the Patient Health Questionnaire-9 (PHQ-9) (37),  
42  
43 296 validated in Spanish with similar behaviour to the original and good acceptance (38).  
44  
45  
46 297 - Anxiety will be assessed using the Hospital Anxiety and Depression Scale (HADS-A scale) (39), a  
47  
48 298 14-item questionnaire validated in PC in Spain (40,41), with special interest and usefulness in  
49  
50 299 the context of PC. It is a measure composed of two sub-scales (HAD-A: anxiety and HAD-D:  
51  
52 300 depression), of 7 items each that are scored from 0 to 3. The authors recommend a threshold  
53  
54 301 of 8 points to detect possible cases of anxiety. One of the main virtues of this tool is the  
55  
56 302 suppression of somatic symptoms. However, in patients with IHD it underestimates people  
57  
58  
59  
60

1  
2  
3 303 with depression (42), while the sub-scale HADS-A has good specificity and predictive value for  
4  
5 304 measuring anxiety in this PC (43).  
6  
7 305 - Adherence to medication will be assessed with the Adherence Refill and Medication Scale  
8  
9  
10 306 (ARMS-e) (44), validated in Spain and used to measure adherence to medication in patients  
11  
12 307 with chronic diseases. It consists of 12 questions and there is no cut-off point, the lower the  
13  
14 308 score, the better the adherence. To quantify adherence, a value of 1 to 4 (never, sometimes,  
15  
16 309 almost always or always) is assigned to each of the responses according to a Likert-type scale.  
17  
18 310 - Quality of life related to health (HRQoL) will be described and assessed with the EQ-5D-5L  
19  
20 311 index (45,46), a generic and standardized instrument developed by the EuroQoL Group, and  
21  
22 312 prepared in several languages, including Spanish, and used in PC (47). It relates the HRQoL  
23  
24 313 with the amount of life and offers a score for the gains in health, the Quality Adjusted Life Year  
25  
26 314 (QALY). The descriptive EQ-5D-5L system comprises 5 dimensions (mobility, personal care,  
27  
28 315 daily activities, pain / discomfort and anxiety / depression).  
29  
30

31  
32 316 *Explanatory and adjustment variables*  
33

34 317 - Sociodemographic: age, sex, nationality, Autonomous Community of residence (Catalonia,  
35  
36 318 Madrid or Canary Islands), marital status (married/partner, single, separated/divorced,  
37  
38 319 widowed), living alone (yes/no), educational level (incomplete primary education, complete  
39  
40 320 primary education, secondary education, university or equivalent studies), income level and  
41  
42 321 employment status (48).  
43  
44 322 - Morbidity related: type of IHD (stable angina, unstable angina, MI), duration of IHD (months),  
45  
46 323 current diagnosis of heart failure in EMR (K86), left ventricular ejection fraction ( $\leq 30\%$ , 30-  
47  
48 324 35%, 35-45%, >45%), NYHA class (I-IV), number and description of chronic concomitant  
49  
50 325 diseases (49), pharmacological treatment (acetylsalicylic acid or  
51  
52 326 clopidogrel/ticagrelor/prasugrel, beta-blockers, statins, angiotensin-converting enzyme (ACE)  
53  
54 327 inhibitors, angiotensin II receptor blockers, other treatments), cardiac catheterization (yes/no)  
55  
56  
57  
58  
59  
60

- 1  
2  
3 328 and participation in a cardiac rehabilitation program before and during the study period  
4  
5 329 (yes/no).  
6  
7 330 - Use of health care resources: primary care (PC) visits, visits to the emergency department,  
8  
9 331 visits to specialists, number of hospitalizations, lengths of stay, prescribed medications, use of  
10  
11 332 diagnostic tests.  
12  
13  
14 333 - Loss of productivity: self-administered questionnaire about work absences related to the  
15  
16 334 illness.  
17  
18 335 - Use of the VCoP: number of logins into the platform.

19  
20  
21 336 This information will be collected online from a patient self-reported questionnaire that the  
22  
23 337 research team will elaborate combined with information from the EMR. VCoP use data will be  
24  
25 338 collected through the platform database.

#### 26 27 339 **Adverse events**

28  
29 340 All significant adverse events as well as unintended consequences for each group will be collected  
30  
31 341 and described by the site researcher, nominated for each PCP and hospital, and reported to the  
32  
33 342 core team. A special form to report trial-related adverse events has been developed and  
34  
35 343 distributed.

#### 36 37 344 **Participant timeline**

38  
39 345 Primary and secondary outcome measures will be collected before the start of the VCoP  
40  
41 346 intervention and at 6, 12 and 18 months. See Table 1.  
42  
43 347 [About here: Table 1 on Schedule of enrolment, interventions, and assessments (SPIRIT checklist)].

#### 44 45 348 **Sample size**

46  
47 349 Assuming an alpha error of 0.05 and power of 80%, the necessary number of patients to detect, by  
48  
49 350 means of independent two-sample t-test, an average minimal important difference of 4 points (SD  
50  
51 351 10) in the PAM questionnaire (12,24) between the intervention and usual care group, is 200  
52  
53 352 patients (100 per arm). Assuming a 20% loss to follow up, the required sample increases to 250  
54  
55 353 (125 per arm).  
56  
57  
58  
59  
60



1  
2  
3 354 **Recruitment**  
4

5 355 Patient recruitment will be organized on each Autonomous Community (Catalonia, Madrid or  
6  
7 356 Canary Islands). The recruitment will be supported by informative meetings with directors and  
8  
9 357 health care professionals (general practitioners, nurses, cardiologists) from the participating  
10  
11 358 centres. In these meetings, a 10-minute presentation describing the study aim, planned time  
12  
13 359 frame and tasks to be carried out by health care professionals, expected resources utilization and  
14  
15 360 funding procedures will be detailed. Patients that fulfil inclusion criteria will be actively  
16  
17 361 encouraged by their health care professionals to participate by providing information about the  
18  
19 362 trial and collecting their informed consent and contact details (e.g. phone number / email). The  
20  
21 363 research team will invite potential participants via phone and mail to access the “e-mpodera<sup>2</sup>”  
22  
23 364 platform where they will be provided with a unique registration code (Figure 1). Patients will be  
24  
25 365 consecutively included in the study; recruitment will be continuous until the sample size is  
26  
27 366 reached.

28  
29  
30  
31  
32 367 [About here: Figure 1 on Flow of participants].  
33

34 368 **Allocation and blinding**  
35

36  
37 369 Two hundred and fifty patients will be randomly assigned to the intervention (VCoP) or control  
38  
39 370 group. The randomisation, stratified by centre, will be central and automatically performed by the  
40  
41 371 online “e-mpodera<sup>2</sup>” platform and the assigned group will be communicated to the patient once  
42  
43 372 he or she has entered the platform and completed baseline assessment (Figure 1). Lack of  
44  
45 373 knowledge of the randomisation sequence by the professionals who participate in the recruitment  
46  
47 374 of patients will therefore be ensured. The intervention group will be taken directly to the  
48  
49 375 registration page of “e-mpodera<sup>2</sup>” VCoP, where they will receive a personalized message to  
50  
51 376 welcome them into the platform. To warrant patient participation and cooperation, this type of  
52  
53 377 intervention cannot be blinded to patients. Data analysis will be blinded to the assignment of the  
54  
55 378 intervention.  
56  
57  
58

59 379 **Data management**  
60

1  
2  
3 380 In order to maintain participant confidentiality all information will be stored with anonymized ID  
4  
5 381 code numbers. The ID code numbers will be unrelated to participants' identifiers, except in a  
6  
7 382 central file with the participants' contact details. All data will be stored on an electronic database  
8  
9 383 management system located on a secure server with password-controlled access provided for  
10  
11 384 research data collection. Databases will be designed to avoid downloading inappropriate values  
12  
13  
14 385 for every variable. Trial monitoring will be the responsibility of the core research team in charge of  
15  
16 386 all quality control activities, assessing adherence to the trial protocol: timely work plan execution  
17  
18 387 and comprehensiveness of data acquisition and data quality.

19  
20  
21 388 The Research Ethics Committees, the representatives of the Health Authority in matters of  
22  
23 389 inspection and the personnel authorized by the Promoter, may only access to check personal data,  
24  
25 390 clinical study procedures and compliance with the rules of good clinical practice (always  
26  
27 391 maintaining the confidentiality of information).

### 392 **Statistical analysis**

393 Sociodemographic and clinical baseline variables for both groups will be analysed by descriptive  
394 methods (mean (SD), median (range), n (%)). The VCoP effect on the primary and secondary  
395 outcomes will be examined by means of multilevel linear regression, with the intervention,  
396 measurement time (0, 6, 12, 18 months) and their interaction as fixed effects (along with other  
397 potential covariates), random intercepts for patients and GP, and random slope for time, to  
398 account for within-subject correlations. We will also analyse the three-way interaction  
399 intervention x time x centre, since usual care could vary between centres, leading to differential  
400 intervention effects. We expect to recruit a sufficient number of GP to allow their inclusion in the  
401 model as a random intercept, but anyway we will perform a sensitivity analysis excluding this  
402 component. Between-group differences at each time-point will be compared by means of Wald's  
403  $\chi^2$  test.

404 We will perform the analyses on an intention-to-treat basis (a sensitivity analysis on the per-  
405 protocol population will be also performed). Multiple imputation will be used for missing data, if

1  
2  
3 406 applicable (Markov Chain Monte Carlo multivariate imputation algorithm, with 10 imputations per  
4  
5 407 variable). Analyses will be carried out with the statistical software R 4.0.2 [http://www.R-](http://www.R-project.org/)  
6  
7 408 [project.org/](http://www.R-project.org/).

9 409 *Cost-effectiveness analysis of the VCoP (6, 12 and 18 months).*

11 410 We will carry out an economic evaluation in which the costs and the results of the VCoP will be  
12  
13 411 compared to the usual care following the recommendations of the guidelines for the management  
14  
15 412 of patients with IHD (3–5), during the period of the clinical trial. The accepted analytical methods  
16  
17 413 by the scientific community will be followed (50). The analysis will take both the perspective of the  
18  
19 414 National Health System and of the social perspective. Therefore, direct healthcare costs and  
20  
21 415 indirect costs will be included. The direct costs per patient will be calculated based on the use of  
22  
23 416 healthcare resources, and the indirect costs will be estimated focusing on productivity losses due  
24  
25 417 to IHD, applying the human capital approach. In addition to including the short-term costs  
26  
27 418 (development and implementation of the VCoP), the costs observed during the follow-up will be  
28  
29 419 included. The use of resources will be obtained from a patient self-reported questionnaire  
30  
31 420 described in the outcome section. In addition, information about work absences related to the  
32  
33 421 illness will be requested. The classic costs estimation approach will be followed multiplying the use  
34  
35 422 of resources by their unit cost. The unit costs will be obtained from the eHealth cost database  
36  
37 423 (*Oblikue Consulting*) and from public sources such as rates and PVP. The main outcome measure  
38  
39 424 will be the incremental cost per gained QALY. The utilities for the estimation of the QALYs will be  
40  
41 425 obtained through the EQ-5D-5L questionnaire (45) that will be completed by the patient at the  
42  
43 426 beginning of the study and at each follow-up visit. Results of the cost-effectiveness analysis will be  
44  
45 427 summarized as the incremental cost-effectiveness ratio (ICER). ICER is the ratio of the differences  
46  
47 428 in costs to the differences in observed effects. Non-parametric methods based on bootstrap  
48  
49 429 simulations will be used to calculate confidence intervals in the ICER. The same nonparametric  
50  
51 430 methods will be used to calculate the acceptability curve that represents the probability that each  
52  
53 431 choice will be cost-effective for different cost-effectiveness thresholds. The willingness-to-pay  
54  
55  
56  
57  
58  
59  
60

1  
2  
3 432 threshold is defined at Euro 25,000/QALY on the basis of the values most recently reported in the  
4  
5 433 Spanish literature (51). Finally, deterministic sensitivity analyses (one, two or several ways) will be  
6  
7 434 carried out in order to assess the impact of the parameters on the cost-effectiveness results of the  
8  
9 435 VCoP.

#### 11 436 **Patient and public involvement**

12 437 This protocol was developed without patient or public involvement. A group of patients with IHD  
13  
14 438 will actively participate in a content-design previous stage using a co-creation methodology with  
15  
16 439 face-to-face sessions and virtual activities.  
17  
18  
19  
20

21 440

#### 23 441 **ETHICS AND DISSEMINATION**

24  
25 442 The study is registered on ClinicalTrials.gov. code NCT03959631  
26  
27 443 (<https://clinicaltrials.gov/ct2/show/NCT03959631?recrs=b&type=Intr&cond=coronary+heart+disease&age=1&draw=2>). Informed consent will be obtained from each participant before  
28  
29 444 randomisation. The project received ethics approval from the local Committees at each  
30  
31 445 participating Autonomous Community: Clinical Research Ethics Committee of Gregorio Marañón  
32  
33 446 University Hospital in Madrid, Nuestra Señora de Candelaria University Hospital in Santa Cruz de  
34  
35 447 Tenerife and from the coordinating centre IDIAP Jordi Gol in Barcelona (19/053-P). Patients will be  
36  
37 448 personally informed by their physicians or nurses about the study and the possibility to participate  
38  
39 449 during a programmed consultation. They will receive written information of the proposed research  
40  
41 450 project, including information regarding the aims of the project, the duration of the participants'  
42  
43 451 involvement, the expected benefits to the participant and the procedures involved in the  
44  
45 452 participation. Recruiters will emphasize that enrolment in the study is voluntary and that  
46  
47 453 participants can withdraw at any moment of the project and that any decision they take in this  
48  
49 454 respect will have no bearing on the medical care received. Once patients have signed the written  
50  
51 455 informed consent, a researcher from the "e-mpodera" team will contact them via phone and/ or  
52  
53 456 mail to provide further information along with the necessary data (username and password) to  
54  
55  
56  
57  
58  
59  
60

1  
2  
3 458 login into the online platform. Additionally, recruiters will highlight that information generated by  
4  
5 459 the study will be published, but no identification details will be divulged. Patients and health care  
6  
7 460 providers will be informed of whom to contact in case of any query and research staff will be  
8  
9 461 available to answer questions.

11 462 We will prepare presentations to disseminate the study findings to healthcare stakeholders and  
12  
13 463 patients, and at relevant national and international conferences. We aim to publish the results of  
14  
15 464 the trial in peer-reviewed journals.  
16  
17  
18

19 465

#### 21 466 **TRIAL STATUS**

22  
23 467 The recruitment of patients in each region will start in September 2020. The estimated end date of  
24  
25 468 the recruitment for this study is December 2020.  
26  
27

28 469

#### 30 470 **REFERENCES**

- 31  
32 471 1. Wilkins E, Wilson L, Wickramasinghe K, Bhatnagar P, Leal J, Luengo-Fernandez R, et al.  
33  
34 472 European Cardiovascular Disease Statistics 2017 edition. Eur Hear Network, Brussels.  
35  
36 473 2017;192.  
37  
38 474 2. Instituto Nacional de Estadística. INE base. [Internet]. [cited 2018 Feb 27]. Available from:  
39  
40 475 <http://www.ine.es/inebmenu/indice.htm#12>  
41  
42 476 3. Ibanez B, James S, Agewall S, Antunes MJ, Bucciarelli-Ducci C, Bueno H, et al. 2017 ESC  
43  
44 477 Guidelines for the management of acute myocardial infarction in patients presenting with  
45  
46 478 ST-segment elevation. Eur Heart J. 2018 Jan 7;39(2):119–77.  
47  
48 479 4. Knuuti J, Wijns W, Saraste A, Capodanno D, Barbato E, Funck-Brentano C, et al. 2019 ESC  
49  
50 480 Guidelines for the diagnosis and management of chronic coronary syndromes. Eur Heart J.  
51  
52 481 2020 Jan 14;41(3):407–77.  
53  
54 482 5. Roffi M, Patrono C, Collet J-P, Mueller C, Valgimigli M, Andreotti F, et al. 2015 ESC  
55  
56 483 Guidelines for the management of acute coronary syndromes in patients presenting  
57  
58  
59  
60

- 1  
2  
3 484 without persistent ST-segment elevation. *Eur Heart J*. 2016 Jan 14;37(3):267–315.  
4  
5 485 6. García-Porrero E, Andrés-Esteban E, de Pablo-Zarzosa C, León-Latre M. *Cardiología*  
6  
7 486 preventiva y rehabilitación. *Rev Española Cardiol*. 2010 Jan;63:40–8.  
8  
9 487 7. Piepoli MF, Corrà U, Dendale P, Frederix I, Prescott E, Schmid JP, et al. Challenges in  
10  
11 488 secondary prevention after acute myocardial infarction: A call for action. *Eur J Prev Cardiol*.  
12  
13 489 2016 Dec 27;23(18):1994–2006.  
14  
15  
16 490 8. Anderson L, Thompson DR, Oldridge N, Zwisler A-D, Rees K, Martin N, et al. Exercise-based  
17  
18 491 cardiac rehabilitation for coronary heart disease. *Cochrane Database Syst Rev*. 2016 Jan  
19  
20 492 5;(1).  
21  
22  
23 493 9. EMPATHiE Consortium. EMPATHiE, empowering patients in the management of chronic  
24  
25 494 diseases. Final Summary Report. 2014.  
26  
27  
28 495 10. Hibbard JH, Greene J. What The Evidence Shows About Patient Activation: Better Health  
29  
30 496 Outcomes And Care Experiences; Fewer Data On Costs. *Health Aff*. 2013 Feb 1;32(2):207–  
31  
32 497 14.  
33  
34 498 11. Greene J, Hibbard JH. Why Does Patient Activation Matter? An Examination of the  
35  
36 499 Relationships Between Patient Activation and Health-Related Outcomes. *J Gen Intern Med*.  
37  
38 500 2012 May 30;27(5):520–6.  
39  
40  
41 501 12. Skolasky RL, Green AF, Scharfstein D, Boulton C, Reider L, Wegener ST. Psychometric  
42  
43 502 Properties of the Patient Activation Measure among Multimorbid Older Adults. *Health Serv*  
44  
45 503 *Res*. 2011 Apr;46(2):457–78.  
46  
47  
48 504 13. Salyers MP, Matthias MS, Spann CL, Lydick JM, Rollins AL, Frankel RM. The Role of Patient  
49  
50 505 Activation in Psychiatric Visits. *Psychiatr Serv*. 2009 Nov;60(11):1535–9.  
51  
52  
53 506 14. Schmittdiel J, Mosen DM, Glasgow RE, Hibbard J, Remmers C, Bellows J. Patient Assessment  
54  
55 507 of Chronic Illness Care (PACIC) and Improved Patient-centered Outcomes for Chronic  
56  
57 508 Conditions. *J Gen Intern Med*. 2008 Jan 21;23(1):77–80.  
58  
59 509 15. Mosen DM, Schmittdiel J, Hibbard J, Sobel D, Remmers C, Bellows J. Is Patient Activation  
60

- 1  
2  
3 510 Associated With Outcomes of Care for Adults With Chronic Conditions? *J Ambul Care*  
4  
5 511 *Manag.* 2007;30(1):21–9.  
6  
7 512 16. Náfrádi L, Nakamoto K, Schulz PJ. Is patient empowerment the key to promote adherence?  
8  
9 513 A systematic review of the relationship between self-efficacy, health locus of control and  
10  
11 514 medication adherence. Asnani MR, editor. *PLoS One.* 2017 Oct 17;12(10):e0186458.  
12  
13  
14 515 17. Risling T, Martinez J, Young J, Thorp-Froslic N. Evaluating Patient Empowerment in  
15  
16 516 Association With eHealth Technology: Scoping Review. *J Med Internet Res.* 2017 Sep  
17  
18 517 29;19(9):e329.  
19  
20  
21 518 18. Li LC, Grimshaw JM, Nielsen C, Judd M, Coyte PC, Graham ID. Evolution of Wenger’s  
22  
23 519 concept of community of practice. *Implement Sci.* 2009 Dec 1;4(1):11.  
24  
25 520 19. Oliva A. *Psychosocial Intervention.* 2013;22(1):15–23.  
26  
27 521 20. Pinilla J, Barber P, B G. El coste de la enfermedad potencialmente prevenible en España.  
28  
29 522 Madrid; 2017.  
30  
31  
32 523 21. Chan A-W, Tetzlaff JM, Gøtzsche PC, Altman DG, Mann H, Berlin JA, et al. SPIRIT 2013  
33  
34 524 explanation and elaboration: guidance for protocols of clinical trials. *BMJ.* 2013 Jan  
35  
36 525 9;346(jan08 15):e7586–e7586.  
37  
38  
39 526 22. Bermejo-Caja CJ, Koatz D, Orrego C, Perestelo-Pérez L, González-González AI, Ballester M,  
40  
41 527 et al. Acceptability and feasibility of a virtual community of practice to primary care  
42  
43 528 professionals regarding patient empowerment: a qualitative pilot study. *BMC Health Serv*  
44  
45 529 *Res.* 2019 Dec 20;19(1):403.  
46  
47  
48 530 23. National Clinical Guideline Centre. MI - Secondary Prevention: Secondary Prevention in  
49  
50 531 Primary and Secondary Care for Patients Following a Myocardial Infarction: Partial Update  
51  
52 532 of NICE CG48. London: Royal College of Physicians; 2013.  
53  
54 533 24. Moreno-Chico C, González-de Paz L, Monforte-Royo C, Arrighi E, Navarro-Rubio MD, Gallart  
55  
56 534 Fernández-Puebla A. Adaptation to European Spanish and psychometric properties of the  
57  
58 535 Patient Activation Measure 13 in patients with chronic diseases. *Fam Pract.* 2017 Oct  
59  
60

- 1  
2  
3 536 1;34(5):627–34.  
4  
5 537 25. González-González AI, Orrego C, Perestelo-Perez L, Bermejo-Caja CJ, Mora N, Koatz D, et al.  
6  
7 538 Effectiveness of a virtual intervention for primary healthcare professionals aimed at  
8  
9 539 improving attitudes towards the empowerment of patients with chronic diseases: Study  
10  
11 540 protocol for a cluster randomized controlled trial (e-MPODERA project). *Trials*. 2017;18(1).  
12  
13  
14 541 26. Alm-Roijer C, Stagmo M, Udén G, Erhardt L. Better Knowledge Improves Adherence to  
15  
16 542 Lifestyle Changes and Medication in Patients with Coronary Heart Disease. *Eur J Cardiovasc*  
17  
18 543 *Nurs*. 2004 Dec 24;3(4):321–30.  
19  
20  
21 544 27. Alm-Roijer C, Fridlund B, Stagmo M, Erhardt L. Knowing your risk factors for coronary heart  
22  
23 545 disease improves adherence to advice on lifestyle changes and medication. *J Cardiovasc*  
24  
25 546 *Nurs*. 21(5):E24-31.  
26  
27  
28 547 28. Saffi MAL, Macedo Junior LJJ de, Trojahn MM, Polanczyk CA, Rabelo-Silva ER. Validity and  
29  
30 548 reliability of a questionnaire on knowledge of cardiovascular risk factors for use in Brazil.  
31  
32 549 *Rev da Esc Enferm da USP*. 2013 Oct;47(5):1083–9.  
33  
34  
35 550 29. Lorig KR, Ritter PL, Gonzalez VM. Hispanic Chronic Disease Self-Management. *Nurs Res*.  
36  
37 551 2003 Nov;52(6):361–9.  
38  
39 552 30. Ritter PL, Lorig K. The English and Spanish Self-Efficacy to Manage Chronic Disease Scale  
40  
41 553 measures were validated using multiple studies. *J Clin Epidemiol*. 2014 Nov;67(11):1265–  
42  
43 554 73.  
44  
45 555 31. Salvadó-Hernández C, Cosculluela-Torres P, Blanes-Monllor C, Parellada-Esquius N,  
46  
47 556 Méndez-Galeano C, Maroto-Villanova N, et al. Insuficiencia cardiaca en atención primaria:  
48  
49 557 actitudes, conocimientos y autocuidado. *Atención Primaria*. 2018 Apr;50(4):213–21.  
50  
51  
52 558 32. Trichopoulou A, Costacou T, Bamia C, Trichopoulos D. Adherence to a Mediterranean Diet  
53  
54 559 and Survival in a Greek Population. *N Engl J Med*. 2003 Jun 26;348(26):2599–608.  
55  
56  
57 560 33. Martínez-González MA, García-Arellano A, Toledo E, Salas-Salvadó J, Buil-Cosiales P, Corella  
58  
59 561 D, et al. A 14-Item Mediterranean Diet Assessment Tool and Obesity Indexes among High-



- 1  
2  
3 562 Risk Subjects: The PREDIMED Trial. Peiró C, editor. PLoS One. 2012 Aug 14;7(8):e43134.  
4  
5 563 34. Sánchez-Tainta A, Zazpe I, Bes-Rastrollo M, Salas-Salvadó J, Bullo M, Sorlí JV, et al.  
6  
7 564 Nutritional adequacy according to carbohydrates and fat quality. Eur J Nutr. 2016 Feb  
8  
9 565 24;55(1):93–106.  
10  
11 566 35. Estruch R, Ros E, Salas-Salvadó J, Covas M-I, Corella D, Arós F, et al. Primary Prevention of  
12  
13 567 Cardiovascular Disease with a Mediterranean Diet. N Engl J Med. 2013 Apr 4;368(14):1279–  
14  
15 568 90.  
16  
17 569 36. Mantilla Toloza SC, Gómez-Conesa A. El Cuestionario Internacional de Actividad Física. Un  
18  
19 570 instrumento adecuado en el seguimiento de la actividad física poblacional. Rev Iberoam  
20  
21 571 Fisioter y Kinesiol. 2007 Jan;10(1):48–52.  
22  
23 572 37. Spitzer RL. Validation and utility of a self-report version of PRIME-MD: the PHQ primary  
24  
25 573 care study. Primary Care Evaluation of Mental Disorders. Patient Health Questionnaire.  
26  
27 574 JAMA. 1999 Nov 10;282(18):1737.  
28  
29 575 38. Diez-Quevedo C, Rangil T, Sanchez-Planell L, Kroenke K, Spitzer RL. Validation and Utility of  
30  
31 576 the Patient Health Questionnaire in Diagnosing Mental Disorders in 1003 General Hospital  
32  
33 577 Spanish Inpatients. Psychosom Med. 2001 Jul;63(4):679–86.  
34  
35 578 39. Quintana JM, Padierna A, Esteban C, Arostegui I, Bilbao A, Ruiz I. Evaluation of the  
36  
37 579 psychometric characteristics of the Spanish version of the Hospital Anxiety and Depression  
38  
39 580 Scale. Acta Psychiatr Scand. 2003 Mar;107(3):216–21.  
40  
41 581 40. Herrero MJ, Blanch J, Peri JM, De Pablo J, Pintor L, Bulbena A. A validation study of the  
42  
43 582 hospital anxiety and depression scale (HADS) in a Spanish population. Gen Hosp Psychiatry.  
44  
45 583 2003 Jul;25(4):277–83.  
46  
47 584 41. Terol-Cantero MC, Cabrera-Perona V, Martín-Aragón M. Revisión de estudios de la Escala  
48  
49 585 de Ansiedad y Depresión Hospitalaria (HAD) en muestras españolas. An Psicol. 2015 Apr  
50  
51 586 25;31(2):494.  
52  
53 587 42. Morys JM, Bellwon J, Adamczyk K, Gruchała M. Depression and anxiety in patients with  
54  
55  
56  
57  
58  
59  
60

- 1  
2  
3 588 coronary artery disease, measured by means of self-report measures and clinician-rated  
4  
5 589 instrument. *Kardiol Pol.* 2016;74(1):53–60.  
6  
7 590 43. Bunevicius A, Staniute M, Brozaitiene J, Pop VJ, Neverauskas J, Bunevicius R. Screening for  
8  
9 591 anxiety disorders in patients with coronary artery disease. *Health Qual Life Outcomes.*  
10  
11 592 2013;11(1):37.  
12  
13 593 44. González-Bueno J, Calvo-Cidoncha E, Sevilla-Sánchez D, Espauella-Panicot J, Codina-Jané C,  
14  
15 594 Santos-Ramos B. Spanish translation and cross-cultural adaptation of the ARMS-scale for  
16  
17 595 measuring medication adherence in polypathological patients. *Aten Primaria.*  
18  
19 596 2017;49(8):459–64.  
20  
21 597 45. Herdman M, Gudex C, Lloyd A, Janssen M, Kind P, Parkin D, et al. Development and  
22  
23 598 preliminary testing of the new five-level version of EQ-5D (EQ-5D-5L). *Qual Life Res.* 2011  
24  
25 599 Dec 9;20(10):1727–36.  
26  
27 600 46. Ramos-Goñi JM, Craig BM, Oppe M, Ramallo-Fariña Y, Pinto-Prades JL, Luo N, et al.  
28  
29 601 Handling Data Quality Issues to Estimate the Spanish EQ-5D-5L Value Set Using a Hybrid  
30  
31 602 Interval Regression Approach. *Value Heal.* 2018 May;21(5):596–604.  
32  
33 603 47. Herdman M, Badia X, Berra S. El EuroQol-5D: una alternativa sencilla para la medición de la  
34  
35 604 calidad de vida relacionada con la salud en atención primaria. *Atención Primaria.*  
36  
37 605 2001;28(6):425–9.  
38  
39 606 48. Schultz WM, Kelli HM, Lisko JC, Varghese T, Shen J, Sandesara P, et al. Socioeconomic  
40  
41 607 Status and Cardiovascular Outcomes. *Circulation.* 2018 May 15;137(20):2166–78.  
42  
43 608 49. O'Halloran J, Miller GC, Britt H. Defining chronic conditions for primary care with ICPC-2.  
44  
45 609 *Fam Pract.* 2004 Aug;21(4):381–6.  
46  
47 610 50. Glick H, Doshi J, Sonnad S, Polsky D. *Economic Evaluation in Clinical Trials.* 1st ed. Oxford:  
48  
49 611 Oxford University Press; 2007.  
50  
51 612 51. Vallejo-Torres L, García-Lorenzo B, Serrano-Aguilar P. Estimating a cost-effectiveness  
52  
53 613 threshold for the Spanish NHS. *Health Econ.* 2018 Apr;27(4):746–61.  
54  
55  
56  
57  
58  
59  
60

1  
2  
3 614  
4

5 615 **CONTRIBUTORS**  
6

7 616 AIG wrote the initial draft of the protocol. CO is the guarantor of the trial. AIG, CO, LP, DK, VP and  
8

9 617 MB conceived the project. SG, AR and CV provided the methodological guidance. AT, VR, ATC,  
10

11 618 JMR, JCR, SD, LM, JGG, NVC, AR, JCdC, JMB, MET, MM, YdR and ABR are co-supervisors of this  
12

13 619 project, providing advice at all stages of the development of the protocol, and contributed to the  
14

15 620 revision of the manuscript. All authors read and approved the final manuscript.  
16  
17

18 621 **FUNDINGS**  
19

20 622 This study has been funded by Instituto de Salud Carlos III through the project "PI18/01404,  
21

22 623 PI18/01397, PI18/01333", Co-funded by European Regional Development Fund, (ERDF) "A way of  
23

24 624 shaping Europe"  
25

26 625 **DISCLAIMER**  
27

28 626 The funder had no role in developing the protocol or obtaining the results for this review.  
29

30 627 **COMPETING INTERES**  
31

32 628 None declared  
33

34 629 **DATA SHARING**  
35

36 630 No additional data available  
37

38 631 **WORD COUNT**  
39

40 632 3,3423  
41  
42  
43  
44  
45  
46  
47  
48  
49  
50  
51  
52  
53  
54  
55  
56  
57  
58  
59  
60

Table 1. Schedule of enrolment, interventions, and assessments (SPIRIT checklist)

| TIMEPOINT                                      | STUDY PERIOD   |          |                 |           |           |
|------------------------------------------------|----------------|----------|-----------------|-----------|-----------|
|                                                | Pre-allocation |          | Post-allocation |           | Close-out |
|                                                | Enrolment      | Baseline | 6 months        | 12 months | 18 months |
| Eligibility screen                             | X              |          |                 |           |           |
| Informed consent                               | X              |          |                 |           |           |
| <b>INTERVENTIONS:</b>                          |                |          |                 |           |           |
| <i>VCoP</i>                                    |                |          |                 |           |           |
| <i>Usual care</i>                              |                |          |                 |           |           |
| <b>ASSESSMENTS:</b>                            |                |          |                 |           |           |
| <i>PAM</i>                                     |                | X        | X               | X         | X         |
| <i>Sociodemographic and clinical variables</i> |                | X        | X*              | X*        | X*        |
| <i>Knowledge</i>                               |                | X        | X               | X         | X         |
| <i>SMCDX</i>                                   |                | X        | X               | X         | X         |
| <i>Mediterranean Diet Questionnaire</i>        |                | X        | X               | X         | X         |
| <i>IPAQ</i>                                    |                | X        | X               | X         | X         |
| <i>PHQ-9</i>                                   |                | X        | X               | X         | X         |
| <i>HADS-A</i>                                  |                | X        | X               | X         | X         |
| <i>ARMS-e</i>                                  |                | X        | X               | X         | X         |
| <i>EQ-5D-5L</i>                                |                | X        | X               | X         | X         |
| <i>Use of resources</i>                        |                |          | X               | X         | X         |
| <i>Use of VCoP</i>                             |                |          |                 |           |           |
| <i>Adverse events</i>                          |                |          |                 |           |           |

HADS = Hospital Anxiety and Depression Scale; IPAQ = International Physical Activity Questionnaire; ARMS-e = Adherence Refill and Medication Scale; PAM = Patient Activation

1  
2  
3 Measure; PHQ-9 = Patient Health Questionnaire; SMCDS = Self-efficacy Managing Chronic Disease  
4 Scale; VCoP = Virtual Community of Practice.  
5 \*Follow-up of just clinical variables  
6  
7  
8  
9  
10  
11  
12  
13  
14  
15  
16  
17  
18  
19  
20  
21  
22  
23  
24  
25  
26  
27  
28  
29  
30  
31  
32  
33  
34  
35  
36  
37  
38  
39  
40  
41  
42  
43  
44  
45  
46  
47  
48  
49  
50  
51  
52  
53  
54  
55  
56  
57  
58  
59  
60

For peer review only

**Figure 1. Flow of participants**

For peer review only

Figure 1. Flow of participants

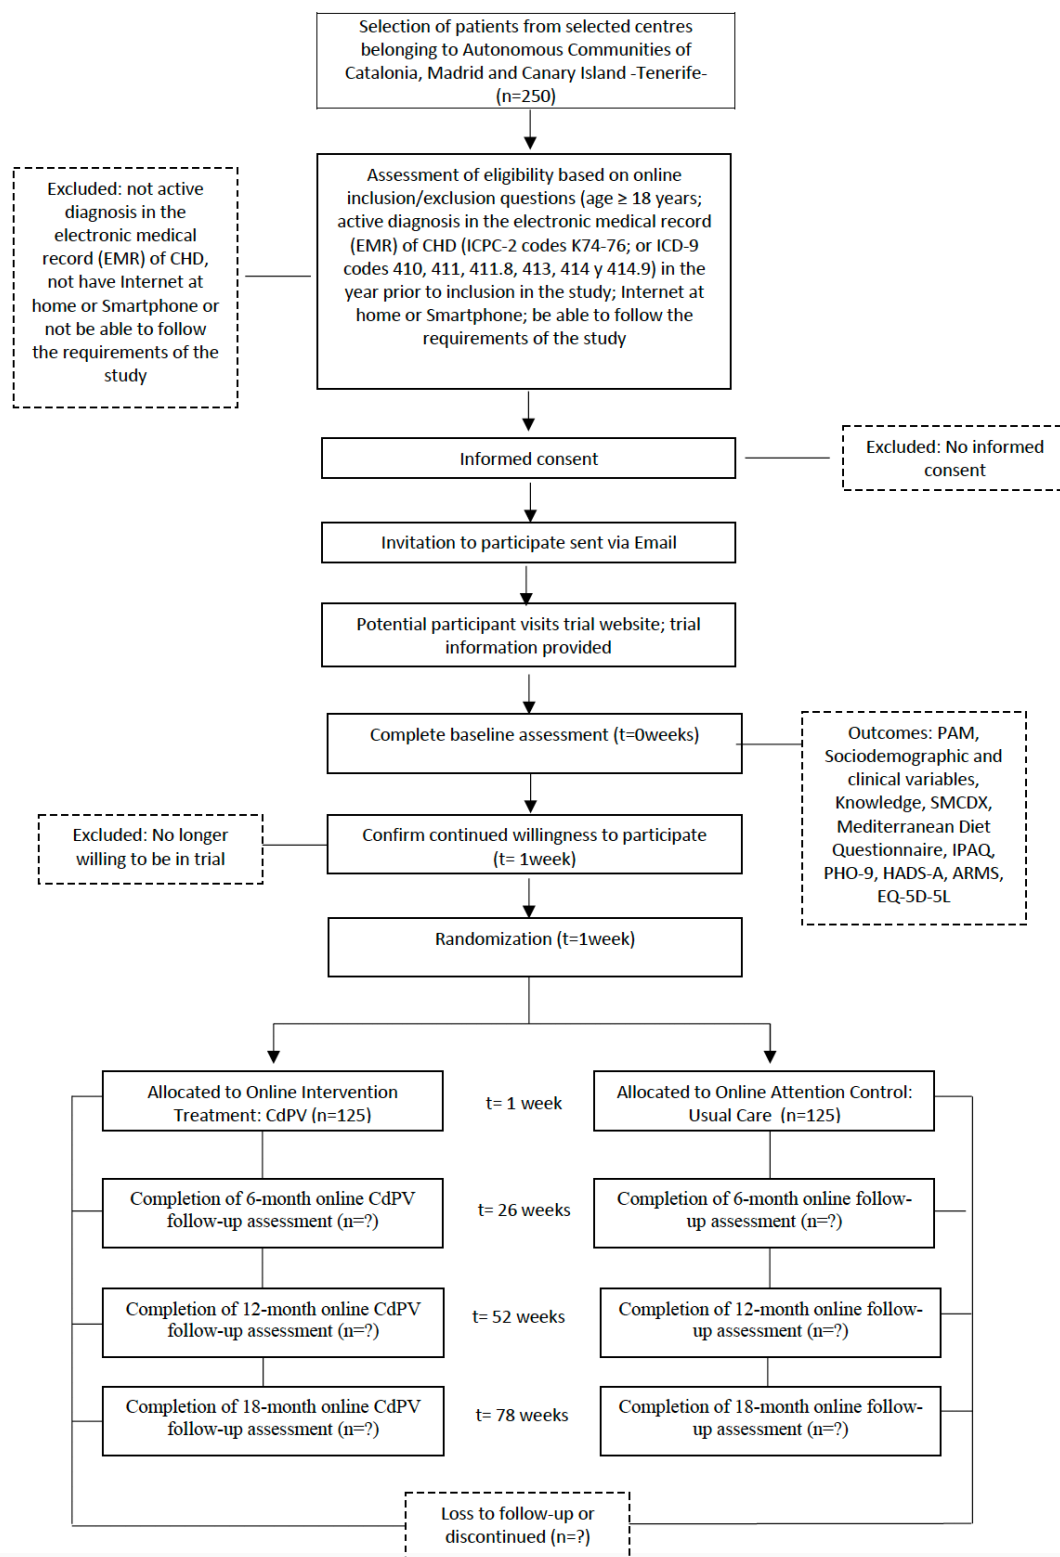

## Additional file 1. SPIRIT checklist

| Section / item                    | Item No | Description                                                                                                                                                                                                                                                                              | Page    |
|-----------------------------------|---------|------------------------------------------------------------------------------------------------------------------------------------------------------------------------------------------------------------------------------------------------------------------------------------------|---------|
| <b>Administrative information</b> |         |                                                                                                                                                                                                                                                                                          |         |
| Title                             | 1       | Descriptive title identifying the study design, population, interventions, and, if applicable, trial acronym                                                                                                                                                                             | 1       |
| Trial registration                | 2a      | Trial identifier and registry name. If not yet registered, name of intended registry                                                                                                                                                                                                     | 7       |
|                                   | 2b      | All items from the World Health Organization Trial Registration Data Set                                                                                                                                                                                                                 | 7       |
| Protocol version                  | 3       | Date and version identifier                                                                                                                                                                                                                                                              | 7       |
| Funding                           | 4       | Sources and types of financial, material, and other support                                                                                                                                                                                                                              | 27      |
| Roles and responsibilities        | 5a      | Name, affiliations, and roles of protocol contributors                                                                                                                                                                                                                                   | 1-5, 26 |
|                                   | 5b      | Name and contact information for the trial sponsor                                                                                                                                                                                                                                       | 5       |
|                                   | 5c      | Role of study sponsor and funders, if any, in study design; collection, management, analysis, and interpretation of data; writing of the report; and the decision to submit the report for publication, including whether they will have ultimate authority over any of these activities | 27      |
|                                   | 5d      | Composition, roles, and responsibilities of the coordinating centre, steering committee, endpoint adjudication committee, data management team, and other individuals or groups overseeing the trial, if applicable (see Item 21a for data monitoring committee)                         | 16-17   |
| <b>Introduction</b>               |         |                                                                                                                                                                                                                                                                                          |         |
| Background                        | 6a      | Description of research question and justification for undertaking the trial, including summary of relevant studies (published and unpublished) examining benefits and harms for each intervention                                                                                       | 9,10    |
|                                   | 6b      | Explanation for choice of comparators                                                                                                                                                                                                                                                    | 9,10    |
| Objectives                        | 7       | Specific objectives or hypotheses                                                                                                                                                                                                                                                        | 10      |
| Trial design                      | 8       | Description of trial design including type of trial (eg, parallel group, crossover, factorial, single group), allocation ratio, and framework (eg, superiority, equivalence, noninferiority, exploratory)                                                                                | 10      |
| <b>Methods</b>                    |         |                                                                                                                                                                                                                                                                                          |         |
| Study setting                     | 9       | Description of study settings (eg, community clinic, academic hospital) and list of countries where data will be collected. Reference to where list of study sites can be obtained                                                                                                       | 10      |
| Eligibility criteria              | 10      | Inclusion and exclusion criteria for participants. If applicable, eligibility criteria for study centres and individuals who will perform the interventions (eg, surgeons, psychotherapists)                                                                                             | 10-11   |



|                                                              |     |                                                                                                                                                                                                                                                                                                                                                                                |           |
|--------------------------------------------------------------|-----|--------------------------------------------------------------------------------------------------------------------------------------------------------------------------------------------------------------------------------------------------------------------------------------------------------------------------------------------------------------------------------|-----------|
| Interventions                                                | 11a | Interventions for each group with sufficient detail to allow replication, including how and when they will be administered                                                                                                                                                                                                                                                     | 11-12     |
|                                                              | 11b | Criteria for discontinuing or modifying allocated interventions for a given trial participant (eg, drug dose change in response to harms, participant request, or improving/worsening disease)                                                                                                                                                                                 | 14        |
|                                                              | 11c | Strategies to improve adherence to intervention protocols, and any procedures for monitoring adherence (eg, drug tablet return, laboratory tests)                                                                                                                                                                                                                              | 11-12     |
|                                                              | 11d | Relevant concomitant care and interventions that are permitted or prohibited during the trial                                                                                                                                                                                                                                                                                  | 11-12     |
| Outcomes                                                     | 12  | Primary, secondary, and other outcomes, including the specific measurement variable (eg, systolic blood pressure), analysis metric (eg, change from baseline, final value, time to event), method of aggregation (eg, median, proportion), and time point for each outcome. Explanation of the clinical relevance of chosen efficacy and harm outcomes is strongly recommended | 12-14     |
| Participant timeline                                         | 13  | Time schedule of enrolment, interventions (including any run-ins and washouts), assessments, and visits for participants. A schematic diagram is highly recommended (see fig 1[f1])                                                                                                                                                                                            | 15, 28-30 |
| Sample size                                                  | 14  | Time schedule of enrolment, interventions (including any run-ins and washouts), assessments, and visits for participants. A schematic diagram is highly recommended (see fig 1[f1])                                                                                                                                                                                            | 15, 28-30 |
| Recruitment                                                  | 15  | Strategies for achieving adequate participant enrolment to reach target sample size                                                                                                                                                                                                                                                                                            | 15        |
| Methods: Assignment of interventions (for controlled trials) |     |                                                                                                                                                                                                                                                                                                                                                                                |           |
| Allocation:                                                  |     |                                                                                                                                                                                                                                                                                                                                                                                |           |
| Sequence generation                                          | 16a | Method of generating the allocation sequence (eg, computer-generated random numbers) and list of any factors for stratification. To reduce predictability of a random sequence, details of any planned restriction (eg, blocking) should be provided in a separate document that is unavailable to those who enrol participants or assign interventions                        | 16        |
| Allocation concealment mechanism                             | 16b | Mechanism of implementing the allocation sequence (eg, central telephone; sequentially numbered, opaque, sealed envelopes), describing any steps to conceal the sequence until interventions are assigned                                                                                                                                                                      | 16        |
| Implementation                                               | 16c | Who will generate the allocation sequence, who will enrol participants, and who will assign participants to interventions                                                                                                                                                                                                                                                      | 16        |

|                                                    |     |                                                                                                                                                                                                                                                                                                                                                                                                              |       |
|----------------------------------------------------|-----|--------------------------------------------------------------------------------------------------------------------------------------------------------------------------------------------------------------------------------------------------------------------------------------------------------------------------------------------------------------------------------------------------------------|-------|
| Blinding (masking)                                 | 17a | Who will be blinded after assignment to interventions (eg, trial participants, care providers, outcome assessors, data analysts) and how                                                                                                                                                                                                                                                                     | 16    |
|                                                    | 17b | If blinded, circumstances under which unblinding is permissible and procedure for revealing a participant's allocated intervention during the trial                                                                                                                                                                                                                                                          | 16    |
| Methods: Data collection, management, and analysis |     |                                                                                                                                                                                                                                                                                                                                                                                                              |       |
| Data collection methods                            | 18a | Plans for assessment and collection of outcome, baseline, and other trial data, including any related processes to promote data quality (eg, duplicate measurements, training of assessors) and a description of study instruments (eg, questionnaires, laboratory tests) along with their reliability and validity, if known. Reference to where data collection forms can be found, if not in the protocol | 12-14 |
|                                                    | 18b | Plans to promote participant retention and complete follow-up, including list of any outcome data to be collected for participants who discontinue or deviate from intervention protocols                                                                                                                                                                                                                    | 12-14 |
| Data management                                    | 19  | Plans for data entry, coding, security, and storage, including any related processes to promote data quality (eg, double data entry; range checks for data values). Reference to where details of data management procedures can be found, if not in the protocol                                                                                                                                            | 16    |
| Statistical methods                                | 20a | Statistical methods for analysing primary and secondary outcomes. Reference to where other details of the statistical analysis plan can be found, if not in the protocol                                                                                                                                                                                                                                     | 17,18 |
|                                                    | 20b | Methods for any additional analyses (eg, subgroup and adjusted analyses)                                                                                                                                                                                                                                                                                                                                     | 17,18 |
|                                                    | 20c | Definition of analysis population relating to protocol non-adherence (eg, as randomised analysis), and any statistical methods to handle missing data (eg, multiple imputation)                                                                                                                                                                                                                              | 17,18 |
| Methods: Monitoring                                |     |                                                                                                                                                                                                                                                                                                                                                                                                              |       |
| Data monitoring                                    | 21a | Composition of data monitoring committee (DMC); summary of its role and reporting structure; statement of whether it is independent from the sponsor and competing interests; and reference to where further details about its charter can be found, if not in the protocol. Alternatively, an explanation of why a DMC is not needed                                                                        | 16-17 |
|                                                    | 21b | Description of any interim analyses and stopping guidelines, including who will have access to these interim results and make the final decision to terminate the trial                                                                                                                                                                                                                                      | 16-17 |
| Harms                                              | 22  | Plans for collecting, assessing, reporting, and managing solicited and spontaneously reported adverse events and other unintended effects of trial interventions or trial conduct                                                                                                                                                                                                                            | 15    |
| Auditing                                           | 23  | Frequency and procedures for auditing trial conduct, if any, and whether the process will be independent from investigators and the sponsor                                                                                                                                                                                                                                                                  | 16-17 |
| Ethics and dissemination                           |     |                                                                                                                                                                                                                                                                                                                                                                                                              |       |
| Research ethics approval                           | 24  | Plans for seeking research ethics committee/institutional review board (REC/IRB) approval                                                                                                                                                                                                                                                                                                                    | 18,19 |
| Protocol amendments                                | 25  | Plans for communicating important protocol modifications (eg, changes to eligibility criteria, outcomes, analyses) to                                                                                                                                                                                                                                                                                        | 18,19 |

|                               |     |                                                                                                                                                                                                                                                                                     |       |
|-------------------------------|-----|-------------------------------------------------------------------------------------------------------------------------------------------------------------------------------------------------------------------------------------------------------------------------------------|-------|
|                               |     | relevant parties (eg, investigators, REC/IRBs, trial participants, trial registries, journals, regulators)                                                                                                                                                                          |       |
| Consent or assent             | 26a | Who will obtain informed consent or assent from potential trial participants or authorised surrogates, and how (see Item 32)                                                                                                                                                        | 18,19 |
|                               | 26b | Additional consent provisions for collection and use of participant data and biological specimens in ancillary studies, if applicable                                                                                                                                               | 18,19 |
| Confidentiality               | 27  | How personal information about potential and enrolled participants will be collected, shared, and maintained in order to protect confidentiality before, during, and after the trial                                                                                                | 18,19 |
| Declaration of interests      | 28  | Financial and other competing interests for principal investigators for the overall trial and each study site                                                                                                                                                                       | 27    |
| Access to data                | 29  | Statement of who will have access to the final trial dataset, and disclosure of contractual agreements that limit such access for investigators                                                                                                                                     | 16-17 |
| Ancillary and post-trial care | 30  | Provisions, if any, for ancillary and post-trial care, and for compensation to those who suffer harm from trial participation                                                                                                                                                       | 18,19 |
| Dissemination policy          | 31a | Plans for investigators and sponsor to communicate trial results to participants, healthcare professionals, the public, and other relevant groups (eg, via publication, reporting in results databases, or other data sharing arrangements), including any publication restrictions | 18,19 |
|                               | 31b | Authorship eligibility guidelines and any intended use of professional writers                                                                                                                                                                                                      | 18,19 |
|                               | 31c | Plans, if any, for granting public access to the full protocol, participant-level dataset, and statistical code                                                                                                                                                                     | 18,19 |
| Appendices                    |     |                                                                                                                                                                                                                                                                                     |       |
| Informed consent materials    | 32  | Model consent form and other related documentation given to participants and authorised surrogates                                                                                                                                                                                  | 31-35 |
|                               | 33  | Plans for collection, laboratory evaluation, and storage of biological specimens for genetic or molecular analysis in the current trial and for future use in ancillary studies, if applicable                                                                                      | NA    |

**Additional file 2. Informed consent****HOJA DE INFORMACIÓN AL PACIENTE****FASE ENSAYO CLÍNICO****INTRODUCCIÓN**

Estimado/a Sr/a:

Le comunicamos que se está desarrollando la puesta en marcha del ensayo clínico denominado **“Efectividad y coste-efectividad de una intervención virtual (Comunidad de Práctica) para la mejora del empoderamiento de pacientes con cardiopatía isquémica en atención primaria: ensayo controlado aleatorizado por conglomerados”** (Cataluña: **PI18/01404/**, Madrid: **PI18/01397**, Canarias: **PI18/01333**).

Este estudio ha sido aprobado por los Comités Éticos de los centros participantes de acuerdo con la legislación vigente, la Ley Orgánica 3/2018, de 5 de diciembre de Protección de Datos Personales y garantía de los derechos digitales, y a la aplicación del Reglamento (UE) 2016/679 del Parlamento europeo y del Consejo de 27 de abril de 2016 de Protección de Datos (RGPD) por el que se regula este tipo de estudios.

Nuestra intención es tan solo que usted reciba la información correcta y suficiente para que pueda evaluar y juzgar si quiere o no participar en este estudio. Para ello lea esta hoja informativa con atención y nosotros le aclararemos las dudas que le puedan surgir después de la explicación. Además, puede consultar con las personas que considere oportuno.

**PARTICIPACIÓN VOLUNTARIA**

Debe saber que su participación en este estudio es voluntaria y que puede decidir no participar o cambiar su decisión y retirar el consentimiento en cualquier momento, sin que por ello se altere la relación con su médico ni se produzca perjuicio alguno en su tratamiento.

**¿Quiénes son los investigadores?**

El equipo de investigación está formado por un equipo multidisciplinar (medicina, psicología, estadística y evaluación de servicios sanitarios, médicos de familia, enfermeras, cardiólogos) cuyos miembros pertenecen a las siguientes instituciones:

Fundación Avedis Donabedian, Gerencia Asistencial de Atención Primaria (GAAP) del Servicio Madrileño de Salud y Servicio de Evaluación del Servicio Canario de la Salud (SESCS).

Este proyecto ha surgido de una iniciativa colaborativa en el marco de la Red de Investigación en Servicios de Salud en Enfermedades Crónicas (REDISSEC).

## DESCRIPCIÓN GENERAL DEL ESTUDIO

### ¿Por qué se hace este estudio?

Para evaluar la efectividad de una de una Comunidad de Práctica (CdP) virtual dirigida a pacientes con cardiopatía isquémica (CI) para mejorar su conocimiento, habilidades y autoconfianza para gestionar su propia salud y de la asistencia sanitaria que recibe.

### ¿Quién puede participar?

Si usted es mayor de 18 años, tiene cardiopatía isquémica, dispone de internet en su hogar y/o Smartphone.

### Procedimiento del estudio:

Existirán dos grupos de estudio, Grupo de intervención (GI) y Grupo Control (GC), y a los pacientes se les asignará uno u otro al azar. En el caso de que usted quisiera participar en el estudio podría estar en cualquiera de los 2 grupos.

### Si usted desea participar, ¿en qué consiste su participación?

La duración del estudio será de 18 meses. Al comienzo del estudio, a los 6, 12 y 18 meses, los participantes cumplimentarán unos cuestionarios online sobre aspectos relacionados con el nivel de activación de cada participante en las decisiones relacionadas con su salud (cuestionario PAM), el conocimiento de la enfermedad, la actitud hacia la enfermedad, la adherencia a la dieta mediterránea, la actividad física y algunos cuestionarios relacionados con variables psicológicas. Cumplimentar estos cuestionarios le llevará aproximadamente 30 minutos.

Si de forma aleatoria cae en el Grupo de intervención, se le ofrecerá participar durante 18 meses en una Comunidad de Práctica Virtual (CdPv) basada en una plataforma web 2.0. Se pondrá a disposición un enlace (vía email) para registrarse e iniciar la participación voluntaria.

Dentro de esta CdPv usted podrá disponer de elementos educativos, lúdicos y herramientas para facilitar el aprendizaje y la transferencia de conocimientos y de sus actitudes. Además, se trabajarán diversas temáticas relacionadas con: competencias en salud, técnicas de

1  
2  
3 autoeficacia, estilos de vida, aceptación de la enfermedad crónica y toma de decisiones  
4 compartida, dieta, planes de ejercicio, gestión del estrés, etc.  
5  
6

7 Si de forma aleatoria cae en el Grupo Control, usted seguirá los cuidados y atención propias  
8 de la práctica clínica habitual.  
9

## 10 **RIESGOS Y BENEFICIOS DE LA PARTICIPACIÓN EN ESTE ESTUDIO**

11  
12  
13  
14 No se prevé ningún tipo de riesgo físico ni psicológico que pueda ser consecuencia de la  
15 participación en este estudio.  
16

17  
18 El principal beneficio para los pacientes con CI será el contribuir a mejorar su conocimiento,  
19 habilidades y autoconfianza para la gestión de su propia salud y de la asistencia sanitaria.  
20  
21

## 22 **CONFIDENCIALIDAD**

23  
24  
25 El tratamiento, la comunicación y la cesión de los datos de carácter personal de todos los  
26 sujetos participantes se ajustará a lo dispuesto en la Ley Orgánica 3/2018, de 5 de diciembre  
27 de Protección de Datos Personales y garantía de los derechos digitales, y a la aplicación de  
28 del Reglamento (UE) 2016/679 del Parlamento europeo y del Consejo de 27 de abril de 2016  
29 de Protección de Datos (RGPD), por lo que es importante que conozca la siguiente  
30 información:  
31  
32

33  
34  
35 - Además de los derechos que ya conoce (acceso, modificación, oposición y cancelación de  
36 datos) ahora también puede limitar el tratamiento de datos que sean incorrectos, solicitar  
37 una copia o que se trasladen a un tercero (portabilidad) los datos que usted ha facilitado  
38 para el estudio. Para ejercitar sus derechos, diríjase al investigador principal del estudio. Le  
39 recordamos que los datos no se pueden eliminar, aunque deje de participar en el estudio  
40 para garantizar la validez de la investigación y cumplir con los deberes legales y los  
41 requisitos de autorización de medicamentos. Así mismo tiene derecho a dirigirse a la  
42 Agencia de Protección de Datos si no quedara satisfecho/  
43  
44  
45

46  
47  
48 - Tanto el Centro como el Promotor y el Investigador son responsables respectivamente del  
49 tratamiento de sus datos y se comprometen a cumplir con la normativa de protección de  
50 datos en vigor. Los datos recogidos para el estudio estarán identificados mediante un  
51 código, de manera que no se incluya información que pueda identificarle, y sólo su médico  
52 del estudio/colaboradores podrá relacionar dichos datos con usted y con su historia clínica.  
53 Por lo tanto, su identidad no será revelada a ninguna otra persona salvo a las autoridades  
54 sanitarias, cuando así lo requieran o en casos de urgencia médica. Los Comités de Ética de  
55 la Investigación, los representantes de la Autoridad Sanitaria en materia de inspección y el  
56 personal autorizado por el Promotor, únicamente podrán acceder para comprobar los datos  
57  
58  
59  
60

1  
2  
3 personales, los procedimientos del estudio clínico y el cumplimiento de las normas de  
4 buena práctica clínica (siempre manteniendo la confidencialidad de la información).  
5  
6

7 - El Investigador y el Promotor están obligados a conservar los datos recogidos para el  
8 estudio al menos hasta 25 años tras su finalización. Posteriormente, su información  
9 personal solo se conservará por el centro para el cuidado de su salud y por el promotor para  
10 otros fines de investigación científica si usted hubiera otorgado su consentimiento para ello,  
11 y si así lo permite la ley y requisitos éticos aplicables.  
12  
13  
14

### 15 **INFORMACIÓN ADICIONAL**

16  
17  
18 Tal y como exige la ley, para participar deberá firmar y fechar el documento de  
19 consentimiento informado.  
20  
21

22  
23 **COORDINADORA DEL PROYECTO (CATALUÑA):**

24 Dra. Carola Orrego, Fundación Avedis Donabedian

25 Contacto: [corrego@fadq.org](mailto:corrego@fadq.org)  
26  
27

28 **INVESTIGADORA PRINCIPAL (MADRID):**

29 Ana Isabel González González, Centro de Salud Vicente Muzas, Gerencia Asistencial de  
30 Atención Primaria. Servicio Madrileño de Salud

31 Contacto: [aisabel.gonzalezg@salud.madrid.org](mailto:aisabel.gonzalezg@salud.madrid.org)  
32  
33

34  
35 **INVESTIGADORA PRINCIPAL (CANARIAS):**

36 Lilisbeth Perestelo Pérez, Servicio de Evaluación del Servicio Canario de la Salud

37 Contacto: [lperperr@gobiernodecanarias.org](mailto:lperperr@gobiernodecanarias.org)  
38  
39  
40  
41  
42  
43  
44  
45  
46  
47  
48  
49  
50  
51  
52  
53  
54  
55  
56  
57  
58  
59  
60

**CONSENTIMIENTO INFORMADO PARA PACIENTES**

Yo (nombre y apellidos)

.....

He leído la hoja de información que se me ha entregado.

He podido hacer preguntas sobre el estudio.

He recibido suficiente información sobre el estudio.

He hablado con:

.....

Comprendo que mi participación es voluntaria.

Comprendo que puedo retirarme del estudio:

1º Cuando quiera

2º Sin tener que dar explicaciones.

3º Sin que esto repercuta en mis cuidados médicos.

- Presto libremente mi conformidad para participar en el estudio y doy mi consentimiento para el acceso y utilización de mis datos en las condiciones detalladas en la hoja de información.

**Nombre del participante:**

**Nombre del investigador:**

**Fecha:**

**Fecha:**

**Firma:**

**Firma:**



1  
2  
3  
4  
5  
6  
7  
8  
9  
10  
11  
12  
13  
14  
15  
16  
17  
18  
19  
20  
21  
22  
23  
24  
25  
26  
27  
28  
29  
30  
31  
32  
33  
34  
35  
36  
37  
38  
39  
40  
41  
42  
43  
44  
45  
46  
47  
48  
49  
50  
51  
52  
53  
54  
55  
56  
57  
58  
59  
60

For peer review only

# BMJ Open

## Effectiveness and cost-effectiveness of a virtual community of practice to improve the empowerment of patients with ischaemic heart disease: study protocol of a randomised controlled trial.

|                               |                                                                                                                                                                                                                                                                                                                                                                                                                                                                                                                                                                                                                                                                                                                                                                                                                                                                                                                                                                                                                                                                                                                                                                                                                                                                                                                                                                                                                                                                                                                                                                                                                                                                                                                                                                                                                                                                                                                                                                                                                                                                                                                                                                                                                                                  |
|-------------------------------|--------------------------------------------------------------------------------------------------------------------------------------------------------------------------------------------------------------------------------------------------------------------------------------------------------------------------------------------------------------------------------------------------------------------------------------------------------------------------------------------------------------------------------------------------------------------------------------------------------------------------------------------------------------------------------------------------------------------------------------------------------------------------------------------------------------------------------------------------------------------------------------------------------------------------------------------------------------------------------------------------------------------------------------------------------------------------------------------------------------------------------------------------------------------------------------------------------------------------------------------------------------------------------------------------------------------------------------------------------------------------------------------------------------------------------------------------------------------------------------------------------------------------------------------------------------------------------------------------------------------------------------------------------------------------------------------------------------------------------------------------------------------------------------------------------------------------------------------------------------------------------------------------------------------------------------------------------------------------------------------------------------------------------------------------------------------------------------------------------------------------------------------------------------------------------------------------------------------------------------------------|
| Journal:                      | <i>BMJ Open</i>                                                                                                                                                                                                                                                                                                                                                                                                                                                                                                                                                                                                                                                                                                                                                                                                                                                                                                                                                                                                                                                                                                                                                                                                                                                                                                                                                                                                                                                                                                                                                                                                                                                                                                                                                                                                                                                                                                                                                                                                                                                                                                                                                                                                                                  |
| Manuscript ID                 | bmjopen-2020-037374.R2                                                                                                                                                                                                                                                                                                                                                                                                                                                                                                                                                                                                                                                                                                                                                                                                                                                                                                                                                                                                                                                                                                                                                                                                                                                                                                                                                                                                                                                                                                                                                                                                                                                                                                                                                                                                                                                                                                                                                                                                                                                                                                                                                                                                                           |
| Article Type:                 | Protocol                                                                                                                                                                                                                                                                                                                                                                                                                                                                                                                                                                                                                                                                                                                                                                                                                                                                                                                                                                                                                                                                                                                                                                                                                                                                                                                                                                                                                                                                                                                                                                                                                                                                                                                                                                                                                                                                                                                                                                                                                                                                                                                                                                                                                                         |
| Date Submitted by the Author: | 17-Aug-2020                                                                                                                                                                                                                                                                                                                                                                                                                                                                                                                                                                                                                                                                                                                                                                                                                                                                                                                                                                                                                                                                                                                                                                                                                                                                                                                                                                                                                                                                                                                                                                                                                                                                                                                                                                                                                                                                                                                                                                                                                                                                                                                                                                                                                                      |
| Complete List of Authors:     | <p>GONZALEZ-GONZALEZ, ANA; Goethe-Universitat Frankfurt am Main Institut fur Allgemeinmedizin; Gerencia Asistencial de Atención Primaria, Servicio Madrileño de Madrid, Red de Investigación en Servicios de Salud en Enfermedades Crónicas (REDISSEC)</p> <p>Perestelo-Pérez, Lilisbeth; Servicio de Evaluación y Planificación del Servicio Canario de la Salud; Red de Investigación en Servicios de Salud en Enfermedades Crónicas (REDISSEC)</p> <p>Koatz, Débora; Avedis Donabedian Research Institute (FAD); Red de Investigación en Servicios de Salud en Enfermedades Crónicas (REDISSEC)</p> <p>Ballester, Marta; Avedis Donabedian Research Institute; Red de Investigación en Servicios de Salud en Enfermedades Crónicas (REDISSEC),</p> <p>Pacheco-Huergo, Valeria; Centro de Atención Primaria Turó, Instituto Catalán de la Salud; Avedis Donabedian Research Institute (FAD)</p> <p>Ramos-García, Vanesa; Fundación Canaria Instituto de Investigación Sanitaria de Canarias (FISC)</p> <p>Torres-Castaño, Alezandra; Fundación Canaria Instituto de Investigación Sanitaria de Canarias (FISC)</p> <p>Rivero-Santana, Amado ; Servicio de Evaluación y Planificación del Servicio Canario de la Salud; Red de Investigación en Servicios de Salud en Enfermedades Crónicas (REDISSEC)</p> <p>Toledo-Chávarri, Ana; Fundación Canaria Instituto de Investigación Sanitaria de Canarias (FISC); Red de Investigación en Servicios de Salud en Enfermedades Crónicas (REDISSEC)</p> <p>Valcárcel-Nazco, Cristina; Fundación Canaria Instituto de Investigación Sanitaria de Canarias (FISC)</p> <p>Mateos-Rodilla, Juana; Escuela Madrileña de Salud, Dirección General de Humanización y Atención al Paciente</p> <p>Obaya-Rebollar, Juan; Centro de Salud Chopera, Gerencia Asistencial de Atención Primaria</p> <p>García-García, Javier; Unidad de Calidad y Seguridad del Paciente. Hospital Universitario Nuestra Señora de Candelaria</p> <p>Díaz-Sánchez, Santiago; Centro de Salud Pintores, Gerencia Asistencial de Atención Primaria</p> <p>Morales-Cobos, Luis; Centro de Salud Las Américas, Gerencia Asistencial de Atención Primaria</p> <p>Bosch-Fontcuberta, Josep; Instituto Catalán de la Salud, Centro de</p> |

|                                 |                                                                                                                                                                                                                                                                                                                                                                                                                                                                                                                                                                                                                                                                                                                                                                                                                                                                                                                                                                                                                                                                                     |
|---------------------------------|-------------------------------------------------------------------------------------------------------------------------------------------------------------------------------------------------------------------------------------------------------------------------------------------------------------------------------------------------------------------------------------------------------------------------------------------------------------------------------------------------------------------------------------------------------------------------------------------------------------------------------------------------------------------------------------------------------------------------------------------------------------------------------------------------------------------------------------------------------------------------------------------------------------------------------------------------------------------------------------------------------------------------------------------------------------------------------------|
|                                 | Atención Primaria Encants; Universitat Autònoma de Barcelona, Departament de Medicina Àrea de Medicina Vallejo-Camazón, Nuria; Hospital Germans Trias i Pujol Rodríguez-Almodovar, Ana; UGC Cardiología, Hospital Universitario Reina Sofía del Castillo, José; Hospital San Juan de Dios, Cardiovascular Area Muñoz-Balsa, Marcos; Unidad de Apoyo Técnico, Gerencia Asistencial Atención Primaria, Servicio Madrileño de Salud del Rey-Granado, Yolanda; Unidad de Apoyo Técnico, Gerencia Asistencial Atención Primaria, Servicio Madrileño de Salud Garrido-Elustondo, Sofía; Comunidad de Madrid Consejería de Sanidad, Centre Family and Community Care Teaching Multiprofessional Unit Tello-Bernabé, María-Eugenia; Centro de Salud El Naranjo, Gerencia Asistencial Atención Primaria, Servicio Madrileño de Salud Ramírez-Puerta, Ana; Unidad de Apoyo Técnico, Gerencia Asistencial Atención Primaria, Servicio Madrileño de Salud Orrego, Carola; Avedis Donabedian Research Institute; Red de Investigación en Servicios de Salud en Enfermedades Crónicas (REDISSEC), |
| <b>Primary Subject Heading</b>: | Cardiovascular medicine                                                                                                                                                                                                                                                                                                                                                                                                                                                                                                                                                                                                                                                                                                                                                                                                                                                                                                                                                                                                                                                             |
| Secondary Subject Heading:      | General practice / Family practice                                                                                                                                                                                                                                                                                                                                                                                                                                                                                                                                                                                                                                                                                                                                                                                                                                                                                                                                                                                                                                                  |
| Keywords:                       | Coronary heart disease < CARDIOLOGY, GENERAL MEDICINE (see Internal Medicine), GERIATRIC MEDICINE, Adult cardiology < CARDIOLOGY                                                                                                                                                                                                                                                                                                                                                                                                                                                                                                                                                                                                                                                                                                                                                                                                                                                                                                                                                    |
|                                 |                                                                                                                                                                                                                                                                                                                                                                                                                                                                                                                                                                                                                                                                                                                                                                                                                                                                                                                                                                                                                                                                                     |

SCHOLARONE™  
Manuscripts



I, the Submitting Author has the right to grant and does grant on behalf of all authors of the Work (as defined in the below author licence), an exclusive licence and/or a non-exclusive licence for contributions from authors who are: i) UK Crown employees; ii) where BMJ has agreed a CC-BY licence shall apply, and/or iii) in accordance with the terms applicable for US Federal Government officers or employees acting as part of their official duties; on a worldwide, perpetual, irrevocable, royalty-free basis to BMJ Publishing Group Ltd ("BMJ") its licensees and where the relevant Journal is co-owned by BMJ to the co-owners of the Journal, to publish the Work in this journal and any other BMJ products and to exploit all rights, as set out in our [licence](#).

The Submitting Author accepts and understands that any supply made under these terms is made by BMJ to the Submitting Author unless you are acting as an employee on behalf of your employer or a postgraduate student of an affiliated institution which is paying any applicable article publishing charge ("APC") for Open Access articles. Where the Submitting Author wishes to make the Work available on an Open Access basis (and intends to pay the relevant APC), the terms of reuse of such Open Access shall be governed by a Creative Commons licence – details of these licences and which [Creative Commons](#) licence will apply to this Work are set out in our licence referred to above.

Other than as permitted in any relevant BMJ Author's Self Archiving Policies, I confirm this Work has not been accepted for publication elsewhere, is not being considered for publication elsewhere and does not duplicate material already published. I confirm all authors consent to publication of this Work and authorise the granting of this licence.

1  
2  
3 1 **TITLE**  
4

5 2 Effectiveness and cost-effectiveness of a virtual community of practice to improve the  
6  
7 3 empowerment of patients with ischaemic heart disease: study protocol of a randomised  
8  
9 4 controlled trial.  
10  
11

12 5  
13  
14 6 **AUTHORS**  
15

16 7 Ana Isabel González-González  
17

18 8 Institute of General Practice, Johann Wolfgang Goethe University, Frankfurt / Main, GERMANY.  
19

20 9 Gerencia Asistencial Atención Primaria, Servicio Madrileño de Salud, Madrid, SPAIN  
21

22 10 Red de Investigación en Servicios de Salud en Enfermedades Crónicas (REDISSEC), Madrid, SPAIN.  
23

24 11 Email: [GonzalezGonzalez@allgemeinmedizin.uni-frankfurt.de](mailto:GonzalezGonzalez@allgemeinmedizin.uni-frankfurt.de)  
25  
26  
27

28 12

29 13 Lilisbeth Perestelo-Pérez  
30

31 14 Servicio de Evaluación y Planificación del Servicio Canario de la Salud, Tenerife, SPAIN  
32

33 15 Red de Investigación en Servicios de Salud en Enfermedades Crónicas (REDISSEC), Madrid, SPAIN.  
34

35 16 Email: [lilisbeth.peresteloperez@sescs.es](mailto:lilisbeth.peresteloperez@sescs.es)  
36  
37  
38

39 17

40 18 Débora Koatz  
41

42 19 Avedis Donabedian Research Institute (FAD), Barcelona, SPAIN  
43

44 20 Universitat Autònoma de Barcelona, Barcelona, SPAIN  
45

46 21 Red de Investigación en Servicios de Salud en Enfermedades Crónicas (REDISSEC), Madrid, SPAIN.  
47

48 22 Email: [dkoatz@fadq.org](mailto:dkoatz@fadq.org)  
49  
50  
51

52 23

53 24 Marta Ballester  
54

55 25 Avedis Donabedian Research Institute (FAD), Barcelona, SPAIN  
56

57 26 Universitat Autònoma de Barcelona, Barcelona, SPAIN  
58  
59  
60

- 1  
2  
3 27 Red de Investigación en Servicios de Salud en Enfermedades Crónicas (REDISSEC), Madrid, SPAIN.  
4  
5 28 Email: [mballester@fadq.org](mailto:mballester@fadq.org)  
6  
7 29  
8  
9 30 Valeria Pacheco-Huergo  
10  
11 31 Centro de Atención Primaria Turó, Instituto Catalán de la Salud, Barcelona, SPAIN  
12  
13 32 Avedis Donabedian Research Institute (FAD), Barcelona, SPAIN  
14  
15 33 Email: [vpachecohuergo@gmail.com](mailto:vpachecohuergo@gmail.com)  
16  
17 34  
18  
19 35 Vanesa Ramos-García  
20  
21 36 Fundación Canaria Instituto de Investigación Sanitaria de Canarias (FIISC), Tenerife, SPAIN  
22  
23 37 Email: [vanesa.ramosgarcia@sescs.es](mailto:vanesa.ramosgarcia@sescs.es)  
24  
25 38  
26  
27 39 Alezandra Torres-Castaño  
28  
29 40 Fundación Canaria Instituto de Investigación Sanitaria de Canarias (FIISC), Tenerife, SPAIN  
30  
31 41 Email: [atorrcas@sescs.es](mailto:atorrcas@sescs.es)  
32  
33 42  
34  
35 43 Amado Rivero-Santana  
36  
37 44 Servicio de Evaluación y Planificación del Servicio Canario de la Salud, Tenerife, SPAIN  
38  
39 45 Red de Investigación en Servicios de Salud en Enfermedades Crónicas (REDISSEC), Madrid, SPAIN  
40  
41 46 Email: [amado.riverosantana@sescs.es](mailto:amado.riverosantana@sescs.es)  
42  
43 47  
44  
45 48 Ana Toledo-Chavarri  
46  
47 49 Fundación Canaria Instituto de Investigación Sanitaria de Canarias (FIISC), Tenerife, SPAIN  
48  
49 50 Red de Investigación en Servicios de Salud en Enfermedades Crónicas (REDISSEC), Madrid, SPAIN  
50  
51 51 Email: [anatoledochavarri@sescs.es](mailto:anatoledochavarri@sescs.es)  
52  
53 52  
54  
55  
56  
57  
58  
59  
60

1  
2  
3  
4  
5  
6  
7  
8  
9  
10  
11  
12  
13  
14  
15  
16  
17  
18  
19  
20  
21  
22  
23  
24  
25  
26  
27  
28  
29  
30  
31  
32  
33  
34  
35  
36  
37  
38  
39  
40  
41  
42  
43  
44  
45  
46  
47  
48  
49  
50  
51  
52  
53  
54  
55  
56  
57  
58  
59  
60

- 53 Cristina Valcarcel Nazco
- 54 Fundación Canaria Instituto de Investigación Sanitaria de Canarias (FIISC), Tenerife, SPAIN
- 55 Email: [cristina.valcarcelnazco@sescs.es](mailto:cristina.valcarcelnazco@sescs.es)
- 56
- 57 Juana Mateos-Rodilla
- 58 Escuela Madrileña de Salud, Dirección General de Humanización y Atención al Paciente, Madrid,
- 59 SPAIN
- 60 Email: [juana.mateos@salud.madrid.org](mailto:juana.mateos@salud.madrid.org)
- 61
- 62 Juan Carlos Obaya-Rebollar
- 63 Centro de Salud Chopera, Gerencia Asistencial de Atención Primaria, Madrid, SPAIN
- 64 Email: [juancarlos.obaya@salud.madrid.org](mailto:juancarlos.obaya@salud.madrid.org)
- 65
- 66 Javier García-García
- 67 Unidad de Calidad y Seguridad del Paciente. Hospital Universitario Nuestra Señora de Candelaria,
- 68 Tenerife, Canarias, SPAIN
- 69 Email: [chaviergg@gmail.com](mailto:chaviergg@gmail.com)
- 70
- 71 Santiago Díaz-Sánchez
- 72 Centro de Salud Pintores, Gerencia Asistencial de Atención Primaria, Madrid, SPAIN
- 73 Email: [sdiazs@salud.madrid.org](mailto:sdiazs@salud.madrid.org)
- 74
- 75 Luis Morales-Cobos
- 76 Centro de Salud Las Américas, Gerencia Asistencial de Atención Primaria, Madrid, SPAIN
- 77 Email: [luis.morales@salud.madrid.org](mailto:luis.morales@salud.madrid.org)
- 78

- 1  
2  
3 79 Josep-María Bosch-Fontcuberta  
4  
5 80 Centro de Atención Primaria Encants, Instituto Catalán de la Salud, Barcelona, SPAIN  
6  
7 81 Departament de Medicina Àrea de Medicina, Universitat Autònoma de Barcelona, SPAIN  
8  
9  
10 82 Email: [boschfontcuberta@gmail.com](mailto:boschfontcuberta@gmail.com)  
11  
12 83  
13  
14 84 Nuria Vallejo-Camazón  
15  
16 85 Hospital Germans Trias i Pujol, Badalona, SPAINol  
17  
18 86 Email: [nvallejo73@hotmail.com](mailto:nvallejo73@hotmail.com)  
19  
20  
21 87  
22  
23 88 Ana Rodríguez-Almodóvar  
24  
25 89 UGC Cardiología, Hospital Universitario Reina Sofía, Córdoba, SPAIN  
26  
27 90 Email: [anarodriguezal@yahoo.es](mailto:anarodriguezal@yahoo.es)  
28  
29  
30 91  
31  
32 92 José Carlos del Castillo  
33  
34 93 Área de prevención y medicina cardiovascular. Hospital San Juan de Dios, Tenerife, SPAIN  
35  
36 94 Email: [jcasrodc@gmail.com](mailto:jcasrodc@gmail.com)  
37  
38  
39 95  
40  
41 96 Marcos Muñoz-Balsa  
42  
43 97 Unidad de Apoyo Técnico, Gerencia Asistencial Atención Primaria, Servicio Madrileño de Salud,  
44  
45 98 Madrid, SPAIN  
46  
47 99 Email: [marcosjose.munoz@salud.madrid.org](mailto:marcosjose.munoz@salud.madrid.org)  
48  
49  
50 100  
51  
52 101 Yolanda del Rey-Granado  
53  
54 102 Unidad de Apoyo Técnico, Gerencia Asistencial Atención Primaria, Servicio Madrileño de Salud,  
55  
56 103 Madrid, SPAIN  
57  
58  
59 104 [yolandadel.rey@salud.madrid.org](mailto:yolandadel.rey@salud.madrid.org)  
60



1  
2  
3  
4  
5  
6  
7  
8  
9  
10  
11  
12  
13  
14  
15  
16  
17  
18  
19  
20  
21  
22  
23  
24  
25  
26  
27  
28  
29  
30  
31  
32  
33  
34  
35  
36  
37  
38  
39  
40  
41  
42  
43  
44  
45  
46  
47  
48  
49  
50  
51  
52  
53  
54  
55  
56  
57  
58  
59  
60

105

106 Sofía Garrido-Elustondo

107 Unidad Docente Multiprofesional de Atención Familiar y Comunitaria Sureste, Unidad de Apoyo a la

108 Investigación, Gerencia Asistencial Atención Primaria, Servicio Madrileño de Salud, Madrid, SPAIN

109 Red de Investigación en Servicios de Salud en Enfermedades Crónicas (REDISSEC), Madrid, SPAIN.

110 Email: [sgarrido@salud.madrid.org](mailto:sgarrido@salud.madrid.org)

111

112 María-Eugenia Tello-Bernabé

113 Centro de Salud El Naranjo, Gerencia Asistencial Atención Primaria, Servicio Madrileño de Salud,

114 Madrid, SPAIN

115 Red de Investigación en Servicios de Salud en Enfermedades Crónicas (REDISSEC), Madrid, SPAIN.

116 Email: [mariaeugenia.tello@salud.madrid.org](mailto:mariaeugenia.tello@salud.madrid.org)

117

118 Ana Belén Ramírez-Puerta

119 Unidad de Apoyo Técnico, Gerencia Asistencial Atención Primaria, Servicio Madrileño de Salud,

120 Madrid, SPAIN

121 Email: [anabelen.ramirez@salud.madrid.org](mailto:anabelen.ramirez@salud.madrid.org)

122

123 Carola Orrego

124 Avedis Donabedian Research Institute (FAD), Barcelona, SPAIN

125 Universitat Autònoma de Barcelona, Barcelona, SPAIN

126 Red de Investigación en Servicios de Salud en Enfermedades Crónicas (REDISSEC), Madrid, SPAIN.

127 Email: [corrego@fadq.org](mailto:corrego@fadq.org)

128

129 **CORRESPONDING AUTHOR**

130 Ana Isabel González-González

1  
2  
3 131 Institute of General Practice, Johann Wolfgang Goethe University, Frankfurt / Main, GERMANY.  
4

5 132 Email: GonzalezGonzalez@allgemeinmedizin.uni-frankfurt.de  
6  
7  
8  
9  
10  
11  
12  
13  
14  
15  
16  
17  
18  
19  
20  
21  
22  
23  
24  
25  
26  
27  
28  
29  
30  
31  
32  
33  
34  
35  
36  
37  
38  
39  
40  
41  
42  
43  
44  
45  
46  
47  
48  
49  
50  
51  
52  
53  
54  
55  
56  
57  
58  
59  
60

For peer review only

1  
2  
3 133 **ABSTRACT**

4  
5 134 **Introduction**

6  
7 135 Virtual Communities of Practice (VCoP) or knowledge-sharing virtual communities offer ubiquitous  
8  
9 136 access to information and exchange possibilities for people in similar situations, which might be  
10  
11 137 especially valuable for the self-management of patients with chronic diseases. In view of the  
12  
13 138 scarce evidence on the clinical and economic impact of these interventions on chronic conditions,  
14  
15 139 we aim to evaluate the effectiveness and cost-effectiveness of a VCoP in the improvement of the  
16  
17 140 activation and other patient empowerment measures in patients with ischemic heart disease  
18  
19 141 (IHD).

20  
21  
22  
23 142 **Methods and analysis**

24  
25 143 A pragmatic randomised controlled trial will be performed in Catalonia, Madrid and Canary  
26  
27 144 Islands, Spain. Two hundred fifty patients with a recent diagnosis of IHD attending the  
28  
29 145 participating centres will be selected and randomised to intervention or control group. The  
30  
31 146 intervention group will be offered participation for 12 months in a VCoP based on a gamified web  
32  
33 147 2.0 platform where there is interaction with other patients and a multidisciplinary professional  
34  
35 148 team. Intervention and control groups will receive usual care. The primary outcome will be  
36  
37 149 measured with the Patient Activation Measure questionnaire at baseline, 6, 12 and 18 months.  
38  
39 150 Secondary outcomes will include: clinical variables; knowledge (Questionnaire of Cardiovascular  
40  
41 151 Risk Factors), attitudes (Self-efficacy Managing Chronic Disease Scale), adherence to  
42  
43 152 Mediterranean diet (Mediterranean Diet Questionnaire), level of physical activity (International  
44  
45 153 Physical Activity Questionnaire), depression (Patient Health Questionnaire), anxiety (Hospital  
46  
47 154 Anxiety Scale-A), medication adherence (Adherence to Refill Medication Scale), quality of life (EQ-  
48  
49 155 5D-5L) and health resources use. Data will be collected from self-reported questionnaires and  
50  
51 156 electronic medical records.

52  
53  
54  
55  
56  
57 157 **Ethics and dissemination**  
58  
59  
60

1  
2  
3 158 The trial was approved by Clinical Research Ethics Committee of Gregorio Marañón University  
4  
5 159 Hospital in Madrid, Nuestra Señora de Candelaria University Hospital in Santa Cruz de Tenerife and  
6  
7 160 IDIAP Jordi Gol in Barcelona. The results will be disseminated through workshops, policy briefs,  
8  
9 161 peer-reviewed publications, local/international conferences.  
10  
11  
12 162 **Registration**  
13  
14 163 ClinicalTrials.gov Identifier: NCT03959631  
15  
16  
17  
18  
19  
20  
21  
22  
23  
24  
25  
26  
27  
28  
29  
30  
31  
32  
33  
34  
35  
36  
37  
38  
39  
40  
41  
42  
43  
44  
45  
46  
47  
48  
49  
50  
51  
52  
53  
54  
55  
56  
57  
58  
59  
60

For peer review only

1  
2  
3 164 **Strengths and limitations of this study**  
4

- 5 165 - We will experimentally test an innovative learning intervention based on a VCoP for patient  
6  
7 166 empowerment, for which the literature lacks experimental evaluations.  
8  
9 167 - VCoP can enhance communication between community members in different geographic  
10  
11 168 locations and even from different time zones.  
12  
13 169 - Participation rate can be low as similar experiences have shown; we will include the active role  
14  
15 170 of a community manager, weekly emails as reminders and a gamified competitive score  
16  
17 171 system to boost participation.  
18  
19 172 - Since all randomised patients will be required a minimum level of digital literacy so, the results  
20  
21 173 could not be generalized to all patients.  
22  
23 174 - Patients belonging to the control group and intervention group could receive different type of  
24  
25 175 self-management support depending on the centres where the care is provided.  
26  
27  
28  
29  
30  
31  
32  
33  
34  
35  
36  
37  
38  
39  
40  
41  
42  
43  
44  
45  
46  
47  
48  
49  
50  
51  
52  
53  
54  
55  
56  
57  
58  
59  
60

## 176 INTRODUCTION

177 In Western countries, ischemic heart disease (IHD) is a major public concern as, and although  
178 mortality from IHD has been significantly reduced since 2000, it remains as a leading cause of  
179 death (50.6 deaths / 100,000 inhabitants in Spain and 106.6 deaths / 100,000 inhabitants in the  
180 United States in 2016) (1). In Spain 32,325 people died from IHD in 2017, according to the National  
181 Institute of Statistics (2). Patients with IHD may have a stable disease or an acute coronary  
182 syndrome, which could present with or without ST segment elevation. In addition, some patients  
183 may have left ventricular dysfunction and heart failure (3–5).

184 For the treatment of IHD, in addition to the pharmacological treatment and, if necessary,  
185 interventional procedures, it is essential to manage cardiovascular risk factors such as smoking  
186 cessation, blood pressure, lipids and diabetes control, adherence to a Mediterranean diet, active  
187 lifestyle and prevent obesity. Moreover, for the secondary prevention of IHD, cardiac  
188 rehabilitation programs are beneficial for patients, improving exercise capacity, quality of life and  
189 psychological well-being (6–8). The active role of the patient is crucial along with the support of  
190 health care providers to achieve a successful secondary prevention of IHD.

191 The empowerment and self-management of patients with chronic conditions is becoming one of  
192 the main objectives in health care, especially in primary care (PC). The European EMPATHiE project  
193 (9) defines the empowered patient as one who "has control over the management of the  
194 conditions of their daily life, actively tries to improve his/her quality of life and has the necessary  
195 knowledge, skills, attitudes and self-perception to adjust his/her behaviour and work in  
196 partnership with others when necessary, to achieve optimal well-being".

197 One of the domains included in patient empowerment is the level of patient activation. Patient  
198 activation incorporates a combination of knowledge about the illness, ability and self-confidence  
199 in the management of the medical conditions (10). It is associated with healthy behaviours, good  
200 chronic disease metrics, and reduced morbidity and unplanned hospitalizations (11–15).

1  
2  
3 201 Interventions aimed at empowerment are intended to provide patients (and their informal  
4  
5 202 caregivers, when appropriate) with the ability to participate in decisions related to their illness to  
6  
7 203 the extent they wish, develop self-confidence, self-esteem and skills to face the physical,  
8  
9 204 emotional and social impact of the disease in their daily lives (16,17).  
10  
11 205 Virtual Communities of Practice (VCoP) offer ubiquitous access to information and exchange  
12  
13 206 possibilities for people in similar situations, which is especially valuable in patients with chronic  
14  
15 207 diseases. A CoP is a group of individuals who participate in a common activity and experience and  
16  
17 208 create a shared identity and deepen their knowledge and experience in the area through a  
18  
19 209 continuous interaction that strengthens their relationships (18). In this context, a group of patients  
20  
21 210 with the same illness such as IHD, could benefit from an intervention of these characteristics  
22  
23 211 where they can share resources and information in addition to having the possibility of receiving  
24  
25 212 peer and professional support.  
26  
27 213 There is little research on the effect of VCoP in terms of their clinical and economic impact and on  
28  
29 214 the empowerment of patients with chronic diseases, especially with IHD (19,20). We propose to  
30  
31 215 address this gap and, thus, present the protocol of a randomised controlled trial, which mainly  
32  
33 216 aims to evaluate the effectiveness and cost-effectiveness of a VCoP to improve the activation and  
34  
35 217 other measures related with patient empowerment in patients with IHD.  
36  
37  
38  
39  
40

41 218

## 42 219 **METHODS AND ANALYSIS**

43 220 This protocol has been prepared in accordance with the Standard Protocol Items:

44 221 Recommendations for Interventional Trials (SPIRIT) checklist (Additional file 1) (21).

45 222 [About here link to Additional file 1 on SPIRIT checklist].

### 46 223 **Study design**

47 224 We plan a pragmatic randomised controlled multicentre trial (*e-mpodera*<sup>2</sup>), with two parallel arms  
48  
49 225 and 18-month follow-up.

### 50 226 **Study setting**

1  
2  
3 227 The setting of the intervention will be a virtual setting. Usual care will be provided at primary care  
4  
5 228 practices (PCPs) and outpatient specialized clinics in Catalonia, Madrid and Canary Islands in Spain.  
6

7  
8 229 **Eligibility criteria**

9  
10 230 Patients with a recent diagnosis of IHD will be screened for the following eligibility criteria:

11  
12 231 *Inclusion criteria*

13  
14 232 Age  $\geq$  18 years; active diagnosis in the electronic medical record (EMR) of IHD (ICPC-2 codes K74-

15  
16 233 76; or ICD-9 codes 410, 411, 411.8, 413, 414 y 414.9) in the year prior to inclusion in the study;

17  
18 234 Internet at home or Smartphone; be able to follow the requirements of the study (e.g. digital

19  
20 235 literacy); have signed the informed consent (Additional file 2).

21  
22 236 [About here link to Additional file 2 on Informed consent].

23  
24  
25 237 *Exclusion criteria*

26  
27 238 Institutionalized, terminal illness, physical or mental disability that limit the ability to answer the

28  
29 239 questionnaires or when telephone / email contact is not available in the PCPs/hospitals'

30  
31 240 databases.

32  
33  
34 241 **Interventions**

35  
36 242 *VCoP group*

37  
38 243 "e-mpodera<sup>2</sup>" is a gamified VCoP on a web 2.0 platform based on the exchange of experiences and

39  
40 244 knowledge through participatory learning (22). It will provide educational, playful elements and

41  
42 245 tools that will facilitate the learning and transfer of knowledge and attitudes among patients with

43  
44 246 IHD and with health care professionals. The structure and components will be designed according

45  
46 247 to the needs and specifications of patients with IHD recruited in an earlier stage using a co-

47  
48 248 creation methodology with face-to-face sessions and virtual activities (forums and interactions)

49  
50 249 that incorporated a personalized itinerary – Patient Journey Map - (published elsewhere) and with

51  
52 250 the use of various types of content including readings, resources, videos, games and virtual

53  
54 251 sessions (22).  
55  
56  
57  
58  
59  
60



1  
2  
3 252 Patients will have access to multidisciplinary professional support as needed and according to  
4  
5 253 what was identified in the content-design stage (published elsewhere) will potentially include  
6  
7 254 general practitioners, cardiologists, psychologists, self-care and self-management specialists,  
8  
9 255 nutritionist and others as necessary. Various thematic areas related to the empowerment of  
10  
11 256 patients and self-care of IHD will be progressively covered: health competence, self-efficacy and  
12  
13 257 activation improvement, behavioural changes, lifestyle / signs / symptoms monitoring, technical  
14  
15 258 skills, chronic disease acceptance and shared decision-making. Special emphasis will be given to  
16  
17 259 the changes recommended by European Guidelines (23) for self-management of IHD including  
18  
19 260 monitoring changes in symptoms, stress management, mental health and adherence to  
20  
21 261 medication, diet, exercise plans, sodium cholesterol, and alcohol restriction and tobacco  
22  
23 262 abstinence. The active role of a community manager, weekly emails as reminders and a gamified  
24  
25 263 competitive score system will boost participation.  
26  
27  
28

29  
30 264 *Usual care group*

31  
32 265 Patients allocated to both the intervention and the control group will continue with their usual  
33  
34 266 self- and professional care according to the local guidelines (3–5).

35  
36 267 **Outcomes measures**

37  
38 268 *Primary outcome*

39  
40 269 The primary outcome will be the patient activation level using the Patient Activation Measure  
41  
42 270 (PAM) questionnaire that assesses activation in patients with chronic diseases (12). The  
43  
44 271 questionnaire consists of 13 items that assesses knowledge, skills and confidence of people for  
45  
46 272 self-care, measured by a Likert 1-4 scale with a total score between 0 and 100 (100 identifies the  
47  
48 273 patients with the highest level of activation). The Spanish translated version has been validated in  
49  
50 274 patients with chronic diseases and has demonstrated a similar behaviour to the original  
51  
52 275 instrument with good validity and reliability properties (24). It has been used in previous studies  
53  
54 276 by this research team (25).

55  
56 277 *Secondary outcomes*  
57  
58  
59  
60

- 1  
2  
3 278 For the effectiveness of the VCoP, we will record the following secondary measures:  
4  
5 279 - Clinical variables such as body mass index, lipid profile (HDL-C, LDL-C), smoking status, number  
6  
7 280 and frequency of angina episodes will be collected through researcher developed online  
8  
9 281 questionnaire that will be fulfilled by health care professionals combined with information  
10  
11 282 from the EMR.  
12  
13  
14 283 - Knowledge about the disease will be assessed through a self-administered online  
15  
16 284 questionnaire based on the Questionnaire of Cardiovascular Risk Factors (Q-FARC) (26–28),  
17  
18 285 previously translated from the English version and adapted to the Spanish population.  
19  
20 286 - Patients' attitudes to self-care will be evaluated using the self-administered Self-efficacy  
21  
22 287 Managing Chronic Disease Scale (SMCDS) (29), translated into Spanish (30) and used in  
23  
24 288 patients with heart failure (31).  
25  
26  
27 289 - Adherence to Mediterranean diet will be assessed with the Mediterranean diet questionnaire  
28  
29 290 (32), validated in the Spanish population in the PREDIMED study (33–35).  
30  
31  
32 291 - Physical activity will be measured using the International Physical Activity Questionnaire  
33  
34 292 (IPAQ), translated and adapted to the Spanish language (36). Patients will be classified into  
35  
36 293 three categories (low, medium and high) according to the index of physical activity (product of  
37  
38 294 the intensity - in METS - by the frequency,) and the duration of the activity.  
39  
40  
41 295 - Depressive disorders will be detected by the Patient Health Questionnaire-9 (PHQ-9) (37),  
42  
43 296 validated in Spanish with similar behaviour to the original and good acceptance (38).  
44  
45  
46 297 - Anxiety will be assessed using the Hospital Anxiety and Depression Scale (HADS-A scale) (39), a  
47  
48 298 14-item questionnaire validated in PC in Spain (40,41), with special interest and usefulness in  
49  
50 299 the context of PC. It is a measure composed of two sub-scales (HAD-A: anxiety and HAD-D:  
51  
52 300 depression), of 7 items each that are scored from 0 to 3. The authors recommend a threshold  
53  
54 301 of 8 points to detect possible cases of anxiety. One of the main virtues of this tool is the  
55  
56 302 suppression of somatic symptoms. However, in patients with IHD it underestimates people  
57  
58  
59  
60

1  
2  
3 303 with depression (42), while the sub-scale HADS-A has good specificity and predictive value for  
4  
5 304 measuring anxiety in this PC (43).  
6  
7 305 - Adherence to medication will be assessed with the Adherence Refill and Medication Scale  
8  
9 306 (ARMS-e) (44), validated in Spain and used to measure adherence to medication in patients  
10  
11 307 with chronic diseases. It consists of 12 questions and there is no cut-off point, the lower the  
12  
13 308 score, the better the adherence. To quantify adherence, a value of 1 to 4 (never, sometimes,  
14  
15 309 almost always or always) is assigned to each of the responses according to a Likert-type scale.  
16  
17  
18 310 - Quality of life related to health (HRQoL) will be described and assessed with the EQ-5D-5L  
19  
20 311 index (45,46), a generic and standardized instrument developed by the EuroQoL Group, and  
21  
22 312 prepared in several languages, including Spanish, and used in PC (47). It relates the HRQoL  
23  
24 313 with the amount of life and offers a score for the gains in health, the Quality Adjusted Life Year  
25  
26 314 (QALY). The descriptive EQ-5D-5L system comprises 5 dimensions (mobility, personal care,  
27  
28 315 daily activities, pain / discomfort and anxiety / depression).  
29  
30

31  
32 316 *Explanatory and adjustment variables*  
33

34 317 - Sociodemographic: age, sex, nationality, Autonomous Community of residence (Catalonia,  
35  
36 318 Madrid or Canary Islands), marital status (married/partner, single, separated/divorced,  
37  
38 319 widowed), living alone (yes/no), educational level (incomplete primary education, complete  
39  
40 320 primary education, secondary education, university or equivalent studies), income level and  
41  
42 321 employment status (48).  
43  
44  
45 322 - Morbidity related: type of IHD (stable angina, unstable angina, MI), duration of IHD (months),  
46  
47 323 current diagnosis of heart failure in EMR (K86), left ventricular ejection fraction ( $\leq 30\%$ , 30-  
48  
49 324 35%, 35-45%, >45%), NYHA class (I-IV), number and description of chronic concomitant  
50  
51 325 diseases (49), pharmacological treatment (acetylsalicylic acid or  
52  
53 326 clopidogrel/ticagrelor/prasugrel, beta-blockers, statins, angiotensin-converting enzyme (ACE)  
54  
55 327 inhibitors, angiotensin II receptor blockers, other treatments), cardiac catheterization (yes/no)  
56  
57  
58  
59  
60

1  
2  
3 328 and participation in a cardiac rehabilitation program before and during the study period  
4  
5 329 (yes/no).  
6  
7 330 - Use of health care resources: primary care (PC) visits, visits to the emergency department,  
8  
9 331 visits to specialists, number of hospitalizations, lengths of stay, prescribed medications, use of  
10  
11 332 diagnostic tests.  
12  
13  
14 333 - Loss of productivity: self-administered questionnaire about work absences related to the  
15  
16 334 illness.  
17  
18 335 - Use of the VCoP: number of logins into the platform and time spent using the platform.  
19  
20  
21 336 This information will be collected online from a patient self-reported questionnaire that the  
22  
23 337 research team will elaborate combined with information from the EMR. VCoP use data will be  
24  
25 338 collected through the platform database.  
26

### 27 339 **Adverse events**

28  
29 340 All significant adverse events as well as unintended consequences for each group will be collected  
30  
31 341 and described by the site researcher, nominated for each PCP and hospital, and reported to the  
32  
33 342 core team. A special form to report trial-related adverse events has been developed and  
34  
35 343 distributed.  
36  
37  
38

### 39 344 **Participant timeline**

40  
41 345 Primary and secondary outcome measures will be collected before the start of the VCoP  
42  
43 346 intervention and at 6, 12 and 18 months. See Table 1.  
44  
45 347 [About here: Table 1 on Schedule of enrolment, interventions, and assessments (SPIRIT checklist)].  
46  
47

### 48 348 **Sample size**

49  
50 349 Assuming an alpha error of 0.05 and power of 80%, the necessary number of patients to detect, by  
51  
52 350 means of independent two-sample t-test, an average minimal important difference of 4 points (SD  
53  
54 351 10) in the PAM questionnaire (12,24) between the intervention and usual care group, is 200  
55  
56 352 patients (100 per arm). Assuming a 20% loss to follow up, the required sample increases to 250  
57  
58 353 (125 per arm).  
59  
60

1  
2  
3 354 **Recruitment**  
4

5 355 Patient recruitment will be organized on each Autonomous Community (Catalonia, Madrid or  
6  
7 356 Canary Islands). The recruitment will be supported by informative meetings with directors and  
8  
9 357 health care professionals (general practitioners, nurses, cardiologists) from the participating  
10  
11 358 centres. In these meetings, a 10-minute presentation describing the study aim, planned time  
12  
13 359 frame and tasks to be carried out by health care professionals, expected resources utilization and  
14  
15 360 funding procedures will be detailed. Patients that fulfil inclusion criteria will be actively  
16  
17 361 encouraged by their health care professionals to participate by providing information about the  
18  
19 362 trial and collecting their informed consent and contact details (e.g. phone number / email). The  
20  
21 363 research team will invite potential participants via phone and mail to access the “e-mpodera<sup>2</sup>”  
22  
23 364 platform where they will be provided with a unique registration code (Figure 1). Patients will be  
24  
25 365 consecutively included in the study; recruitment will be continuous until the sample size is  
26  
27 366 reached.

28  
29  
30  
31  
32 367 [About here: Figure 1 on Flow of participants].  
33

34 368 **Allocation and blinding**  
35

36  
37 369 Two hundred and fifty patients will be randomly assigned to the intervention (VCoP) or control  
38  
39 370 group. The randomisation, stratified by centre, will be central and automatically performed by the  
40  
41 371 online “e-mpodera<sup>2</sup>” platform and the assigned group will be communicated to the patient once  
42  
43 372 he or she has entered the platform and completed baseline assessment (Figure 1). Lack of  
44  
45 373 knowledge of the randomisation sequence by the professionals who participate in the recruitment  
46  
47 374 of patients will therefore be ensured. The intervention group will be taken directly to the  
48  
49 375 registration page of “e-mpodera<sup>2</sup>” VCoP, where they will receive a personalized message to  
50  
51 376 welcome them into the platform. To warrant patient participation and cooperation, this type of  
52  
53 377 intervention cannot be blinded to patients. Data analysis will be blinded to the assignment of the  
54  
55 378 intervention.  
56  
57

58  
59 379 **Data management**  
60

1  
2  
3 380 In order to maintain participant confidentiality all information will be stored with anonymized ID  
4  
5 381 code numbers. The ID code numbers will be unrelated to participants' identifiers, except in a  
6  
7 382 central file with the participants' contact details. All data will be stored on an electronic database  
8  
9 383 management system located on a secure server with password-controlled access provided for  
10  
11 384 research data collection. Databases will be designed to avoid downloading inappropriate values  
12  
13  
14 385 for every variable. Trial monitoring will be the responsibility of the core research team in charge of  
15  
16 386 all quality control activities, assessing adherence to the trial protocol: timely work plan execution  
17  
18 387 and comprehensiveness of data acquisition and data quality.

19  
20  
21 388 The Research Ethics Committees, the representatives of the Health Authority in matters of  
22  
23 389 inspection and the personnel authorized by the Promoter, may only access to check personal data,  
24  
25 390 clinical study procedures and compliance with the rules of good clinical practice (always  
26  
27 391 maintaining the confidentiality of information).

### 392 **Statistical analysis**

393 Sociodemographic and clinical baseline variables for both groups will be analysed by descriptive  
394 methods (mean (SD), median (range), n (%)). The VCoP effect on the primary and secondary  
395 outcomes will be examined by means of multilevel linear regression, with the intervention,  
396 measurement time (0, 6, 12, 18 months) and their interaction as fixed effects (along with other  
397 potential covariates), random intercepts for patients and GP, and unstructured covariance to  
398 account for within-subject correlations. We will also analyse the three-way interaction  
399 intervention x time x centre, since usual care could vary between centres, leading to differential  
400 intervention effects. We expect to recruit a sufficient number of GPs to allow their inclusion in the  
401 model as a random intercept, but we will perform a sensitivity analysis as well excluding this  
402 component. Between-group differences at each time-point will be compared by means of Wald's  
403  $\chi^2$  test.

404 We will perform the analyses on an intention-to-treat basis (a sensitivity analysis on the per-  
405 protocol population will be also performed). Multiple imputation will be used for missing data, if

1  
2  
3 406 applicable (Markov Chain Monte Carlo multivariate imputation algorithm, with 10 imputations per  
4  
5 407 variable). Analyses will be carried out with the statistical software R 4.0.2 [http://www.R-](http://www.R-project.org/)  
6  
7 408 [project.org/](http://www.R-project.org/).

9  
10 409 *Cost-effectiveness analysis of the VCoP*

11  
12 410 We will carry out an economic evaluation, from baseline to 18-month follow-up, in which the costs  
13  
14 411 and the results of the VCoP will be compared to the usual care following the recommendations of  
15  
16 412 the guidelines for the management of patients with IHD (3–5), during the period of the clinical  
17  
18 413 trial. The accepted analytical methods by the scientific community will be followed (50). The  
19  
20 414 analysis will take both the perspective of the National Health System and of the social perspective.  
21  
22 415 Therefore, direct healthcare costs and indirect costs will be included. The direct costs per patient  
23  
24 416 will be calculated based on the use of healthcare resources, and the indirect costs will be  
25  
26 417 estimated focusing on productivity losses due to IHD, applying the human capital approach. In  
27  
28 418 addition to including the short-term costs (development and implementation of the VCoP), the  
29  
30 419 costs observed during the follow-up will be included. We do not plan to consider opportunity costs  
31  
32 420 in our cost-effectiveness analysis from the social perspective, as we understand that patients will  
33  
34 421 use their free time on the VCoP and therefore they will not spend work or productive time not  
35  
36 422 generating a cost for the system. The use of resources will be obtained from a patient self-  
37  
38 423 reported questionnaire described in the outcome section. In addition, information about work  
39  
40 424 absences related to the illness will be requested. The classic costs estimation approach will be  
41  
42 425 followed multiplying the use of resources by their unit cost. The unit costs will be obtained from  
43  
44 426 the eHealth cost database (*Oblikue Consulting*) and from public sources such as rates and PVP. The  
45  
46 427 main outcome measure will be the incremental cost per gained QALY. The utilities for the  
47  
48 428 estimation of the QALYs will be obtained through the EQ-5D-5L questionnaire (45) that will be  
49  
50 429 completed by the patient at the beginning of the study and at each follow-up visit. Results of the  
51  
52 430 cost-effectiveness analysis will be summarized as the incremental cost-effectiveness ratio (ICER).  
53  
54 431 ICER is the ratio of the differences in costs to the differences in observed effects. Non-parametric  
55  
56  
57  
58  
59  
60

1  
2  
3 432 methods based on bootstrap simulations will be used to calculate confidence intervals in the ICER.  
4  
5 433 The same nonparametric methods will be used to calculate the acceptability curve that represents  
6  
7 434 the probability that each choice will be cost-effective for different cost-effectiveness thresholds.  
8  
9 435 The willingness-to-pay threshold is defined at Euro 25,000/QALY on the basis of the values most  
10  
11 436 recently reported in the Spanish literature (51). Finally, deterministic sensitivity analyses (one, two  
12  
13 437 or several ways) will be carried out in order to assess the impact of the parameters on the cost-  
14  
15 438 effectiveness results of the VCoP.

### 18 439 **Patient and public involvement**

20 440 This protocol was developed without patient or public involvement. A group of patients with IHD  
21  
22 441 will actively participate in a content-design previous stage using a co-creation methodology with  
23  
24 442 face-to-face sessions and virtual activities.  
25  
26 443

### 29 444 **ETHICS AND DISSEMINATION**

31 445 The study is registered on ClinicalTrials.gov. code NCT03959631  
32  
33 446 (<https://clinicaltrials.gov/ct2/show/NCT03959631?recrs=b&type=Intr&cond=coronary+heart+dise>  
34  
35 447 [ase&age=1&draw=2](https://clinicaltrials.gov/ct2/show/NCT03959631?recrs=b&type=Intr&cond=coronary+heart+dise&age=1&draw=2)). Informed consent will be obtained from each participant before  
36  
37 448 randomisation. The project received ethics approval from the local Committees at each  
38  
39 449 participating Autonomous Community: Clinical Research Ethics Committee of Gregorio Marañón  
40  
41 450 University Hospital in Madrid, Nuestra Señora de Candelaria University Hospital in Santa Cruz de  
42  
43 451 Tenerife and from the coordinating centre IDIAP Jordi Gol in Barcelona (19/053-P). Patients will be  
44  
45 452 personally informed by their physicians or nurses about the study and the possibility to participate  
46  
47 453 during a programmed consultation. They will receive written information of the proposed research  
48  
49 454 project, including information regarding the aims of the project, the duration of the participants'  
50  
51 455 involvement, the expected benefits to the participant and the procedures involved in the  
52  
53 456 participation. Recruiters will emphasize that enrolment in the study is voluntary and that  
54  
55 457 participants can withdraw at any moment of the project and that any decision they take in this  
56  
57  
58  
59  
60



1  
2  
3 458 respect will have no bearing on the medical care received. Once patients have signed the written  
4  
5 459 informed consent, a researcher from the “e-mpodera<sup>2</sup>” team will contact them via phone and/ or  
6  
7 460 mail to provide further information along with the necessary data (username and password) to  
8  
9 461 login into the online platform. Additionally, recruiters will highlight that information generated by  
10  
11 462 the study will be published, but no identification details will be divulged. Patients and health care  
12  
13 463 providers will be informed of whom to contact in case of any query and research staff will be  
14  
15 464 available to answer questions.  
16  
17

18 465 We will prepare presentations to disseminate the study findings to healthcare stakeholders and  
19  
20 466 patients, and at relevant national and international conferences. We aim to publish the results of  
21  
22 467 the trial in peer-reviewed journals.  
23  
24  
25

26 468

#### 27 469 **TRIAL STATUS**

28  
29  
30 470 The recruitment of patients in each region will start in September 2020. The estimated end date of  
31  
32 471 the recruitment for this study is December 2020.  
33

34 472

#### 35 473 **REFERENCES**

- 36  
37  
38  
39 474 1. Wilkins E, Wilson L, Wickramasinghe K, Bhatnagar P, Leal J, Luengo-Fernandez R, et al.  
40  
41 475 European Cardiovascular Disease Statistics 2017 edition. Eur Hear Network, Brussels.  
42  
43 476 2017;192.  
44  
45 477 2. Instituto Nacional de Estadística. INE base. [Internet]. [cited 2018 Feb 27]. Available from:  
46  
47 478 <http://www.ine.es/inebmenu/indice.htm#12>  
48  
49  
50 479 3. Ibanez B, James S, Agewall S, Antunes MJ, Bucciarelli-Ducci C, Bueno H, et al. 2017 ESC  
51  
52 480 Guidelines for the management of acute myocardial infarction in patients presenting with  
53  
54 481 ST-segment elevation. Eur Heart J. 2018 Jan 7;39(2):119–77.  
55  
56 482 4. Knuuti J, Wijns W, Saraste A, Capodanno D, Barbato E, Funck-Brentano C, et al. 2019 ESC  
57  
58 483 Guidelines for the diagnosis and management of chronic coronary syndromes. Eur Heart J.  
59  
60

- 1  
2  
3 484 2020 Jan 14;41(3):407–77.  
4  
5 485 5. Roffi M, Patrono C, Collet J-P, Mueller C, Valgimigli M, Andreotti F, et al. 2015 ESC  
6  
7 486 Guidelines for the management of acute coronary syndromes in patients presenting  
8  
9 487 without persistent ST-segment elevation. *Eur Heart J*. 2016 Jan 14;37(3):267–315.  
10  
11 488 6. García-Porrero E, Andrés-Esteban E, de Pablo-Zarzosa C, León-Latre M. *Cardiología*  
12  
13 489 preventiva y rehabilitación. *Rev Española Cardiol*. 2010 Jan;63:40–8.  
14  
15 490 7. Piepoli MF, Corrà U, Dendale P, Frederix I, Prescott E, Schmid JP, et al. Challenges in  
16  
17 491 secondary prevention after acute myocardial infarction: A call for action. *Eur J Prev Cardiol*.  
18  
19 492 2016 Dec 27;23(18):1994–2006.  
20  
21 493 8. Anderson L, Thompson DR, Oldridge N, Zwisler A-D, Rees K, Martin N, et al. Exercise-based  
22  
23 494 cardiac rehabilitation for coronary heart disease. *Cochrane Database Syst Rev*. 2016 Jan  
24  
25 495 5;(1).  
26  
27 496 9. EMPATHiE Consortium. EMPATHiE, empowering patients in the management of chronic  
28  
29 497 diseases. Final Summary Report. 2014.  
30  
31 498 10. Hibbard JH, Greene J. What The Evidence Shows About Patient Activation: Better Health  
32  
33 499 Outcomes And Care Experiences; Fewer Data On Costs. *Health Aff*. 2013 Feb 1;32(2):207–  
34  
35 500 14.  
36  
37 501 11. Greene J, Hibbard JH. Why Does Patient Activation Matter? An Examination of the  
38  
39 502 Relationships Between Patient Activation and Health-Related Outcomes. *J Gen Intern Med*.  
40  
41 503 2012 May 30;27(5):520–6.  
42  
43 504 12. Skolasky RL, Green AF, Scharfstein D, Boulton C, Reider L, Wegener ST. Psychometric  
44  
45 505 Properties of the Patient Activation Measure among Multimorbid Older Adults. *Health Serv*  
46  
47 506 *Res*. 2011 Apr;46(2):457–78.  
48  
49 507 13. Salyers MP, Matthias MS, Spann CL, Lydick JM, Rollins AL, Frankel RM. The Role of Patient  
50  
51 508 Activation in Psychiatric Visits. *Psychiatr Serv*. 2009 Nov;60(11):1535–9.  
52  
53 509 14. Schmittiel J, Mosen DM, Glasgow RE, Hibbard J, Remmers C, Bellows J. Patient Assessment  
54  
55  
56  
57  
58  
59  
60

- 1  
2  
3 510 of Chronic Illness Care (PACIC) and Improved Patient-centered Outcomes for Chronic  
4  
5 511 Conditions. *J Gen Intern Med*. 2008 Jan 21;23(1):77–80.  
6  
7 512 15. Mosen DM, Schmittdiel J, Hibbard J, Sobel D, Remmers C, Bellows J. Is Patient Activation  
8  
9 513 Associated With Outcomes of Care for Adults With Chronic Conditions? *J Ambul Care*  
10  
11 514 *Manag*. 2007;30(1):21–9.  
12  
13  
14 515 16. Náfrádi L, Nakamoto K, Schulz PJ. Is patient empowerment the key to promote adherence?  
15  
16 516 A systematic review of the relationship between self-efficacy, health locus of control and  
17  
18 517 medication adherence. Asnani MR, editor. *PLoS One*. 2017 Oct 17;12(10):e0186458.  
19  
20  
21 518 17. Risling T, Martinez J, Young J, Thorp-Frosie N. Evaluating Patient Empowerment in  
22  
23 519 Association With eHealth Technology: Scoping Review. *J Med Internet Res*. 2017 Sep  
24  
25 520 29;19(9):e329.  
26  
27  
28 521 18. Li LC, Grimshaw JM, Nielsen C, Judd M, Coyte PC, Graham ID. Evolution of Wenger’s  
29  
30 522 concept of community of practice. *Implement Sci*. 2009 Dec 1;4(1):11.  
31  
32 523 19. Oliva A. *Psychosocial Intervention*. 2013;22(1):15–23.  
33  
34 524 20. Pinilla J, Barber P, B G. El coste de la enfermedad potencialmente prevenible en España.  
35  
36 525 Madrid; 2017.  
37  
38  
39 526 21. Chan A-W, Tetzlaff JM, Gotsche PC, Altman DG, Mann H, Berlin JA, et al. SPIRIT 2013  
40  
41 527 explanation and elaboration: guidance for protocols of clinical trials. *BMJ*. 2013 Jan  
42  
43 528 9;346(jan08 15):e7586–e7586.  
44  
45  
46 529 22. Bermejo-Caja CJ, Koatz D, Orrego C, Perestelo-Pérez L, González-González AI, Ballester M,  
47  
48 530 et al. Acceptability and feasibility of a virtual community of practice to primary care  
49  
50 531 professionals regarding patient empowerment: a qualitative pilot study. *BMC Health Serv*  
51  
52 532 *Res*. 2019 Dec 20;19(1):403.  
53  
54  
55 533 23. National Clinical Guideline Centre. MI - Secondary Prevention: Secondary Prevention in  
56  
57 534 Primary and Secondary Care for Patients Following a Myocardial Infarction: Partial Update  
58  
59 535 of NICE CG48. London: Royal College of Physicians; 2013.  
60

- 1  
2  
3 536 24. Moreno-Chico C, González-de Paz L, Monforte-Royo C, Arrighi E, Navarro-Rubio MD, Gallart  
4  
5 537 Fernández-Puebla A. Adaptation to European Spanish and psychometric properties of the  
6  
7 538 Patient Activation Measure 13 in patients with chronic diseases. *Fam Pract*. 2017 Oct  
8  
9 539 1;34(5):627–34.
- 11  
12 540 25. González-González AI, Orrego C, Perestelo-Perez L, Bermejo-Caja CJ, Mora N, Koatz D, et al.  
13  
14 541 Effectiveness of a virtual intervention for primary healthcare professionals aimed at  
15  
16 542 improving attitudes towards the empowerment of patients with chronic diseases: Study  
17  
18 543 protocol for a cluster randomized controlled trial (e-MPODERA project). *Trials*. 2017;18(1).
- 20  
21 544 26. Alm-Roijer C, Stagmo M, Udén G, Erhardt L. Better Knowledge Improves Adherence to  
22  
23 545 Lifestyle Changes and Medication in Patients with Coronary Heart Disease. *Eur J Cardiovasc*  
24  
25 546 *Nurs*. 2004 Dec 24;3(4):321–30.
- 27  
28 547 27. Alm-Roijer C, Fridlund B, Stagmo M, Erhardt L. Knowing your risk factors for coronary heart  
29  
30 548 disease improves adherence to advice on lifestyle changes and medication. *J Cardiovasc*  
31  
32 549 *Nurs*. 21(5):E24-31.
- 34  
35 550 28. Saffi MAL, Macedo Junior LJJ de, Trojahn MM, Polanczyk CA, Rabelo-Silva ER. Validity and  
36  
37 551 reliability of a questionnaire on knowledge of cardiovascular risk factors for use in Brazil.  
38  
39 552 *Rev da Esc Enferm da USP*. 2013 Oct;47(5):1083–9.
- 41  
42 553 29. Lorig KR, Ritter PL, González VM. Hispanic Chronic Disease Self-Management. *Nurs Res*.  
43  
44 554 2003 Nov;52(6):361–9.
- 45  
46 555 30. Ritter PL, Lorig K. The English and Spanish Self-Efficacy to Manage Chronic Disease Scale  
47  
48 556 measures were validated using multiple studies. *J Clin Epidemiol*. 2014 Nov;67(11):1265–  
49  
50 557 73.
- 52  
53 558 31. Salvadó-Hernández C, Cosculluela-Torres P, Blanes-Monllor C, Parellada-Esquiús N,  
54  
55 559 Méndez-Galeano C, Maroto-Villanova N, et al. Insuficiencia cardíaca en atención primaria:  
56  
57 560 actitudes, conocimientos y autocuidado. *Atención Primaria*. 2018 Apr;50(4):213–21.
- 59  
60 561 32. Trichopoulou A, Costacou T, Bamia C, Trichopoulos D. Adherence to a Mediterranean Diet

- 1  
2  
3 562 and Survival in a Greek Population. *N Engl J Med*. 2003 Jun 26;348(26):2599–608.  
4  
5 563 33. Martínez-González MA, García-Arellano A, Toledo E, Salas-Salvadó J, Buil-Cosiales P, Corella  
6  
7 564 D, et al. A 14-Item Mediterranean Diet Assessment Tool and Obesity Indexes among High-  
8  
9 565 Risk Subjects: The PREDIMED Trial. Peiró C, editor. *PLoS One*. 2012 Aug 14;7(8):e43134.  
10  
11  
12 566 34. Sánchez-Tainta A, Zazpe I, Bes-Rastrollo M, Salas-Salvadó J, Bullo M, Sorlí JV, et al.  
13  
14 567 Nutritional adequacy according to carbohydrates and fat quality. *Eur J Nutr*. 2016 Feb  
15  
16 568 24;55(1):93–106.  
17  
18  
19 569 35. Estruch R, Ros E, Salas-Salvadó J, Covas M-I, Corella D, Arós F, et al. Primary Prevention of  
20  
21 570 Cardiovascular Disease with a Mediterranean Diet. *N Engl J Med*. 2013 Apr 4;368(14):1279–  
22  
23 571 90.  
24  
25 572 36. Mantilla Toloza SC, Gómez-Conesa A. El Cuestionario Internacional de Actividad Física. Un  
26  
27 573 instrumento adecuado en el seguimiento de la actividad física poblacional. *Rev Iberoam*  
28  
29 574 *Fisioter y Kinesiol*. 2007 Jan;10(1):48–52.  
30  
31  
32 575 37. Spitzer RL. Validation and utility of a self-report version of PRIME-MD: the PHQ primary  
33  
34 576 care study. Primary Care Evaluation of Mental Disorders. Patient Health Questionnaire.  
35  
36 577 *JAMA*. 1999 Nov 10;282(18):1737.  
37  
38  
39 578 38. Diez-Quevedo C, Rangil T, Sanchez-Planell L, Kroenke K, Spitzer RL. Validation and Utility of  
40  
41 579 the Patient Health Questionnaire in Diagnosing Mental Disorders in 1003 General Hospital  
42  
43 580 Spanish Inpatients. *Psychosom Med*. 2001 Jul;63(4):679–86.  
44  
45  
46 581 39. Quintana JM, Padierna A, Esteban C, Arostegui I, Bilbao A, Ruiz I. Evaluation of the  
47  
48 582 psychometric characteristics of the Spanish version of the Hospital Anxiety and Depression  
49  
50 583 Scale. *Acta Psychiatr Scand*. 2003 Mar;107(3):216–21.  
51  
52  
53 584 40. Herrero MJ, Blanch J, Peri JM, De Pablo J, Pintor L, Bulbena A. A validation study of the  
54  
55 585 hospital anxiety and depression scale (HADS) in a Spanish population. *Gen Hosp Psychiatry*.  
56  
57 586 2003 Jul;25(4):277–83.  
58  
59 587 41. Terol-Cantero MC, Cabrera-Perona V, Martín-Aragón M. Revisión de estudios de la Escala  
60

- 1  
2  
3 588 de Ansiedad y Depresión Hospitalaria (HAD) en muestras españolas. *An Psicol.* 2015 Apr  
4  
5 589 25;31(2):494.  
6  
7 590 42. Moryś JM, Bellwon J, Adamczyk K, Gruchała M. Depression and anxiety in patients with  
8  
9 591 coronary artery disease, measured by means of self-report measures and clinician-rated  
10  
11 592 instrument. *Kardiol Pol.* 2016;74(1):53–60.  
12  
13  
14 593 43. Bunevicius A, Staniute M, Brozaitiene J, Pop VJ, Neverauskas J, Bunevicius R. Screening for  
15  
16 594 anxiety disorders in patients with coronary artery disease. *Health Qual Life Outcomes.*  
17  
18 595 2013;11(1):37.  
19  
20  
21 596 44. González-Bueno J, Calvo-Cidoncha E, Sevilla-Sánchez D, Espauella-Panicot J, Codina-Jané C,  
22  
23 597 Santos-Ramos B. Spanish translation and cross-cultural adaptation of the ARMS-scale for  
24  
25 598 measuring medication adherence in polypathological patients. *Aten Primaria.*  
26  
27 599 2017;49(8):459–64.  
28  
29  
30 600 45. Herdman M, Gudex C, Lloyd A, Janssen M, Kind P, Parkin D, et al. Development and  
31  
32 601 preliminary testing of the new five-level version of EQ-5D (EQ-5D-5L). *Qual Life Res.* 2011  
33  
34 602 Dec 9;20(10):1727–36.  
35  
36  
37 603 46. Ramos-Goñi JM, Craig BM, Oppe M, Ramallo-Fariña Y, Pinto-Prades JL, Luo N, et al.  
38  
39 604 Handling Data Quality Issues to Estimate the Spanish EQ-5D-5L Value Set Using a Hybrid  
40  
41 605 Interval Regression Approach. *Value Heal.* 2018 May;21(5):596–604.  
42  
43  
44 606 47. Herdman M, Badia X, Berra S. El EuroQol-5D: una alternativa sencilla para la medición de la  
45  
46 607 calidad de vida relacionada con la salud en atención primaria. *Atención Primaria.*  
47  
48 608 2001;28(6):425–9.  
49  
50  
51 609 48. Schultz WM, Kelli HM, Lisko JC, Varghese T, Shen J, Sandesara P, et al. Socioeconomic  
52  
53 610 Status and Cardiovascular Outcomes. *Circulation.* 2018 May 15;137(20):2166–78.  
54  
55  
56 611 49. O'Halloran J, Miller GC, Britt H. Defining chronic conditions for primary care with ICPC-2.  
57  
58 612 *Fam Pract.* 2004 Aug;21(4):381–6.  
59  
60 613 50. Glick H, Doshi J, Sonnad S, Polsky D. *Economic Evaluation in Clinical Trials.* 1st ed. Oxford:

1  
2  
3 614 Oxford University Press; 2007.  
4

5 615 51. Vallejo-Torres L, García-Lorenzo B, Serrano-Aguilar P. Estimating a cost-effectiveness  
6  
7 616 threshold for the Spanish NHS. Health Econ. 2018 Apr;27(4):746–61.  
8  
9

10 617

11  
12 618 **CONTRIBUTORS**

13  
14 619 AIG wrote the initial draft of the protocol. CO is the guarantor of the trial. AIG, CO, LP, DK, VP and  
15  
16 620 MB conceived the project. SG, AR and CV provided the methodological guidance. AT, VR, ATC,  
17  
18 621 JMR, JCR, SD, LM, JGG, NVC, AR, JCdC, JMB, MET, MM, YdR and ABR are co-supervisors of this  
19  
20 622 project, providing advice at all stages of the development of the protocol, and contributed to the  
21  
22 623 revision of the manuscript. All authors read and approved the final manuscript.  
23  
24

25 624 **FUNDINGS**

26  
27 625 This study has been funded by Instituto de Salud Carlos III through the project “PI18/01404,  
28  
29 626 PI18/01397, PI18/01333”, Co-funded by European Regional Development Fund, (ERDF) “A way of  
30  
31 627 shaping Europe”  
32  
33

34 628 **DISCLAIMER**

35  
36 629 The funder had no role in developing the protocol or obtaining the results for this review.  
37

38 630 **COMPETING INTERES**

39  
40 631 None declared  
41

42 632 **DATA SHARING**

43  
44 633 No additional data available  
45  
46

47 634 **WORD COUNT**

48  
49 635 3,474  
50  
51  
52  
53  
54  
55  
56  
57  
58  
59  
60

Table 1. Schedule of enrolment, interventions, and assessments (SPIRIT checklist)

| TIMEPOINT                                      | STUDY PERIOD   |          |                 |           |           |
|------------------------------------------------|----------------|----------|-----------------|-----------|-----------|
|                                                | Pre-allocation |          | Post-allocation |           | Close-out |
|                                                | Enrolment      | Baseline | 6 months        | 12 months | 18 months |
| Eligibility screen                             | X              |          |                 |           |           |
| Informed consent                               | X              |          |                 |           |           |
| <b>INTERVENTIONS:</b>                          |                |          |                 |           |           |
| <i>VCoP</i>                                    |                |          |                 |           |           |
| <i>Usual care</i>                              |                |          |                 |           |           |
| <b>ASSESSMENTS:</b>                            |                |          |                 |           |           |
| <i>PAM</i>                                     |                | X        | X               | X         | X         |
| <i>Sociodemographic and clinical variables</i> |                | X        | X*              | X*        | X*        |
| <i>Knowledge</i>                               |                | X        | X               | X         | X         |
| <i>SMCDX</i>                                   |                | X        | X               | X         | X         |
| <i>Mediterranean Diet Questionnaire</i>        |                | X        | X               | X         | X         |
| <i>IPAQ</i>                                    |                | X        | X               | X         | X         |
| <i>PHQ-9</i>                                   |                | X        | X               | X         | X         |
| <i>HADS-A</i>                                  |                | X        | X               | X         | X         |
| <i>ARMS-e</i>                                  |                | X        | X               | X         | X         |
| <i>EQ-5D-5L</i>                                |                | X        | X               | X         | X         |
| <i>Use of resources</i>                        |                |          | X               | X         | X         |
| <i>Use of VCoP</i>                             |                |          |                 |           |           |
| <i>Adverse events</i>                          |                |          |                 |           |           |

HADS = Hospital Anxiety and Depression Scale; IPAQ = International Physical Activity Questionnaire; ARMS-e = Adherence Refill and Medication Scale; PAM = Patient Activation



1  
2  
3 Measure; PHQ-9 = Patient Health Questionnaire; SMCDS = Self-efficacy Managing Chronic Disease  
4 Scale; VCoP = Virtual Community of Practice.  
5 \*Follow-up of just clinical variables  
6  
7  
8  
9  
10  
11  
12  
13  
14  
15  
16  
17  
18  
19  
20  
21  
22  
23  
24  
25  
26  
27  
28  
29  
30  
31  
32  
33  
34  
35  
36  
37  
38  
39  
40  
41  
42  
43  
44  
45  
46  
47  
48  
49  
50  
51  
52  
53  
54  
55  
56  
57  
58  
59  
60

For peer review only

**Figure 1. Flow of participants**

For peer review only

Figure 1. Flow of participants



## Additional file 1. SPIRIT checklist

| Section / item                    | Item No | Description                                                                                                                                                                                                                                                                              | Page    |
|-----------------------------------|---------|------------------------------------------------------------------------------------------------------------------------------------------------------------------------------------------------------------------------------------------------------------------------------------------|---------|
| <b>Administrative information</b> |         |                                                                                                                                                                                                                                                                                          |         |
| Title                             | 1       | Descriptive title identifying the study design, population, interventions, and, if applicable, trial acronym                                                                                                                                                                             | 1       |
| Trial registration                | 2a      | Trial identifier and registry name. If not yet registered, name of intended registry                                                                                                                                                                                                     | 7       |
|                                   | 2b      | All items from the World Health Organization Trial Registration Data Set                                                                                                                                                                                                                 | 7       |
| Protocol version                  | 3       | Date and version identifier                                                                                                                                                                                                                                                              | 7       |
| Funding                           | 4       | Sources and types of financial, material, and other support                                                                                                                                                                                                                              | 27      |
| Roles and responsibilities        | 5a      | Name, affiliations, and roles of protocol contributors                                                                                                                                                                                                                                   | 1-5, 26 |
|                                   | 5b      | Name and contact information for the trial sponsor                                                                                                                                                                                                                                       | 5       |
|                                   | 5c      | Role of study sponsor and funders, if any, in study design; collection, management, analysis, and interpretation of data; writing of the report; and the decision to submit the report for publication, including whether they will have ultimate authority over any of these activities | 27      |
|                                   | 5d      | Composition, roles, and responsibilities of the coordinating centre, steering committee, endpoint adjudication committee, data management team, and other individuals or groups overseeing the trial, if applicable (see Item 21a for data monitoring committee)                         | 16-17   |
| <b>Introduction</b>               |         |                                                                                                                                                                                                                                                                                          |         |
| Background                        | 6a      | Description of research question and justification for undertaking the trial, including summary of relevant studies (published and unpublished) examining benefits and harms for each intervention                                                                                       | 9,10    |
|                                   | 6b      | Explanation for choice of comparators                                                                                                                                                                                                                                                    | 9,10    |
| Objectives                        | 7       | Specific objectives or hypotheses                                                                                                                                                                                                                                                        | 10      |
| Trial design                      | 8       | Description of trial design including type of trial (eg, parallel group, crossover, factorial, single group), allocation ratio, and framework (eg, superiority, equivalence, noninferiority, exploratory)                                                                                | 10      |
| <b>Methods</b>                    |         |                                                                                                                                                                                                                                                                                          |         |
| Study setting                     | 9       | Description of study settings (eg, community clinic, academic hospital) and list of countries where data will be collected. Reference to where list of study sites can be obtained                                                                                                       | 10      |
| Eligibility criteria              | 10      | Inclusion and exclusion criteria for participants. If applicable, eligibility criteria for study centres and individuals who will perform the interventions (eg, surgeons, psychotherapists)                                                                                             | 10-11   |

|                                                              |     |                                                                                                                                                                                                                                                                                                                                                                                |           |
|--------------------------------------------------------------|-----|--------------------------------------------------------------------------------------------------------------------------------------------------------------------------------------------------------------------------------------------------------------------------------------------------------------------------------------------------------------------------------|-----------|
| Interventions                                                | 11a | Interventions for each group with sufficient detail to allow replication, including how and when they will be administered                                                                                                                                                                                                                                                     | 11-12     |
|                                                              | 11b | Criteria for discontinuing or modifying allocated interventions for a given trial participant (eg, drug dose change in response to harms, participant request, or improving/worsening disease)                                                                                                                                                                                 | 14        |
|                                                              | 11c | Strategies to improve adherence to intervention protocols, and any procedures for monitoring adherence (eg, drug tablet return, laboratory tests)                                                                                                                                                                                                                              | 11-12     |
|                                                              | 11d | Relevant concomitant care and interventions that are permitted or prohibited during the trial                                                                                                                                                                                                                                                                                  | 11-12     |
| Outcomes                                                     | 12  | Primary, secondary, and other outcomes, including the specific measurement variable (eg, systolic blood pressure), analysis metric (eg, change from baseline, final value, time to event), method of aggregation (eg, median, proportion), and time point for each outcome. Explanation of the clinical relevance of chosen efficacy and harm outcomes is strongly recommended | 12-14     |
| Participant timeline                                         | 13  | Time schedule of enrolment, interventions (including any run-ins and washouts), assessments, and visits for participants. A schematic diagram is highly recommended (see fig 1[f1])                                                                                                                                                                                            | 15, 28-30 |
| Sample size                                                  | 14  | Time schedule of enrolment, interventions (including any run-ins and washouts), assessments, and visits for participants. A schematic diagram is highly recommended (see fig 1[f1])                                                                                                                                                                                            | 15, 28-30 |
| Recruitment                                                  | 15  | Strategies for achieving adequate participant enrolment to reach target sample size                                                                                                                                                                                                                                                                                            | 15        |
| Methods: Assignment of interventions (for controlled trials) |     |                                                                                                                                                                                                                                                                                                                                                                                |           |
| Allocation:                                                  |     |                                                                                                                                                                                                                                                                                                                                                                                |           |
| Sequence generation                                          | 16a | Method of generating the allocation sequence (eg, computer-generated random numbers) and list of any factors for stratification. To reduce predictability of a random sequence, details of any planned restriction (eg, blocking) should be provided in a separate document that is unavailable to those who enrol participants or assign interventions                        | 16        |
| Allocation concealment mechanism                             | 16b | Mechanism of implementing the allocation sequence (eg, central telephone; sequentially numbered, opaque, sealed envelopes), describing any steps to conceal the sequence until interventions are assigned                                                                                                                                                                      | 16        |
| Implementation                                               | 16c | Who will generate the allocation sequence, who will enrol participants, and who will assign participants to interventions                                                                                                                                                                                                                                                      | 16        |

|                                                    |     |                                                                                                                                                                                                                                                                                                                                                                                                              |       |
|----------------------------------------------------|-----|--------------------------------------------------------------------------------------------------------------------------------------------------------------------------------------------------------------------------------------------------------------------------------------------------------------------------------------------------------------------------------------------------------------|-------|
| Blinding (masking)                                 | 17a | Who will be blinded after assignment to interventions (eg, trial participants, care providers, outcome assessors, data analysts) and how                                                                                                                                                                                                                                                                     | 16    |
|                                                    | 17b | If blinded, circumstances under which unblinding is permissible and procedure for revealing a participant's allocated intervention during the trial                                                                                                                                                                                                                                                          | 16    |
| Methods: Data collection, management, and analysis |     |                                                                                                                                                                                                                                                                                                                                                                                                              |       |
| Data collection methods                            | 18a | Plans for assessment and collection of outcome, baseline, and other trial data, including any related processes to promote data quality (eg, duplicate measurements, training of assessors) and a description of study instruments (eg, questionnaires, laboratory tests) along with their reliability and validity, if known. Reference to where data collection forms can be found, if not in the protocol | 12-14 |
|                                                    | 18b | Plans to promote participant retention and complete follow-up, including list of any outcome data to be collected for participants who discontinue or deviate from intervention protocols                                                                                                                                                                                                                    | 12-14 |
| Data management                                    | 19  | Plans for data entry, coding, security, and storage, including any related processes to promote data quality (eg, double data entry; range checks for data values). Reference to where details of data management procedures can be found, if not in the protocol                                                                                                                                            | 16    |
| Statistical methods                                | 20a | Statistical methods for analysing primary and secondary outcomes. Reference to where other details of the statistical analysis plan can be found, if not in the protocol                                                                                                                                                                                                                                     | 17,18 |
|                                                    | 20b | Methods for any additional analyses (eg, subgroup and adjusted analyses)                                                                                                                                                                                                                                                                                                                                     | 17,18 |
|                                                    | 20c | Definition of analysis population relating to protocol non-adherence (eg, as randomised analysis), and any statistical methods to handle missing data (eg, multiple imputation)                                                                                                                                                                                                                              | 17,18 |
| Methods: Monitoring                                |     |                                                                                                                                                                                                                                                                                                                                                                                                              |       |
| Data monitoring                                    | 21a | Composition of data monitoring committee (DMC); summary of its role and reporting structure; statement of whether it is independent from the sponsor and competing interests; and reference to where further details about its charter can be found, if not in the protocol. Alternatively, an explanation of why a DMC is not needed                                                                        | 16-17 |
|                                                    | 21b | Description of any interim analyses and stopping guidelines, including who will have access to these interim results and make the final decision to terminate the trial                                                                                                                                                                                                                                      | 16-17 |
| Harms                                              | 22  | Plans for collecting, assessing, reporting, and managing solicited and spontaneously reported adverse events and other unintended effects of trial interventions or trial conduct                                                                                                                                                                                                                            | 15    |
| Auditing                                           | 23  | Frequency and procedures for auditing trial conduct, if any, and whether the process will be independent from investigators and the sponsor                                                                                                                                                                                                                                                                  | 16-17 |
| Ethics and dissemination                           |     |                                                                                                                                                                                                                                                                                                                                                                                                              |       |
| Research ethics approval                           | 24  | Plans for seeking research ethics committee/institutional review board (REC/IRB) approval                                                                                                                                                                                                                                                                                                                    | 18,19 |
| Protocol amendments                                | 25  | Plans for communicating important protocol modifications (eg, changes to eligibility criteria, outcomes, analyses) to                                                                                                                                                                                                                                                                                        | 18,19 |

|                               |     |                                                                                                                                                                                                                                                                                     |       |
|-------------------------------|-----|-------------------------------------------------------------------------------------------------------------------------------------------------------------------------------------------------------------------------------------------------------------------------------------|-------|
|                               |     | relevant parties (eg, investigators, REC/IRBs, trial participants, trial registries, journals, regulators)                                                                                                                                                                          |       |
| Consent or assent             | 26a | Who will obtain informed consent or assent from potential trial participants or authorised surrogates, and how (see Item 32)                                                                                                                                                        | 18,19 |
|                               | 26b | Additional consent provisions for collection and use of participant data and biological specimens in ancillary studies, if applicable                                                                                                                                               | 18,19 |
| Confidentiality               | 27  | How personal information about potential and enrolled participants will be collected, shared, and maintained in order to protect confidentiality before, during, and after the trial                                                                                                | 18,19 |
| Declaration of interests      | 28  | Financial and other competing interests for principal investigators for the overall trial and each study site                                                                                                                                                                       | 27    |
| Access to data                | 29  | Statement of who will have access to the final trial dataset, and disclosure of contractual agreements that limit such access for investigators                                                                                                                                     | 16-17 |
| Ancillary and post-trial care | 30  | Provisions, if any, for ancillary and post-trial care, and for compensation to those who suffer harm from trial participation                                                                                                                                                       | 18,19 |
| Dissemination policy          | 31a | Plans for investigators and sponsor to communicate trial results to participants, healthcare professionals, the public, and other relevant groups (eg, via publication, reporting in results databases, or other data sharing arrangements), including any publication restrictions | 18,19 |
|                               | 31b | Authorship eligibility guidelines and any intended use of professional writers                                                                                                                                                                                                      | 18,19 |
|                               | 31c | Plans, if any, for granting public access to the full protocol, participant-level dataset, and statistical code                                                                                                                                                                     | 18,19 |
| Appendices                    |     |                                                                                                                                                                                                                                                                                     |       |
| Informed consent materials    | 32  | Model consent form and other related documentation given to participants and authorised surrogates                                                                                                                                                                                  | 31-35 |
|                               | 33  | Plans for collection, laboratory evaluation, and storage of biological specimens for genetic or molecular analysis in the current trial and for future use in ancillary studies, if applicable                                                                                      | NA    |

**Additional file 2. Informed consent****HOJA DE INFORMACIÓN AL PACIENTE****FASE ENSAYO CLÍNICO****INTRODUCCIÓN**

Estimado/a Sr/a:

Le comunicamos que se está desarrollando la puesta en marcha del ensayo clínico denominado **“Efectividad y coste-efectividad de una intervención virtual (Comunidad de Práctica) para la mejora del empoderamiento de pacientes con cardiopatía isquémica en atención primaria: ensayo controlado aleatorizado por conglomerados”** (Cataluña: **PI18/01404/**, Madrid: **PI18/01397**, Canarias: **PI18/01333**).

Este estudio ha sido aprobado por los Comités Éticos de los centros participantes de acuerdo con la legislación vigente, la Ley Orgánica 3/2018, de 5 de diciembre de Protección de Datos Personales y garantía de los derechos digitales, y a la aplicación del Reglamento (UE) 2016/679 del Parlamento europeo y del Consejo de 27 de abril de 2016 de Protección de Datos (RGPD) por el que se regula este tipo de estudios.

Nuestra intención es tan solo que usted reciba la información correcta y suficiente para que pueda evaluar y juzgar si quiere o no participar en este estudio. Para ello lea esta hoja informativa con atención y nosotros le aclararemos las dudas que le puedan surgir después de la explicación. Además, puede consultar con las personas que considere oportuno.

**PARTICIPACIÓN VOLUNTARIA**

Debe saber que su participación en este estudio es voluntaria y que puede decidir no participar o cambiar su decisión y retirar el consentimiento en cualquier momento, sin que por ello se altere la relación con su médico ni se produzca perjuicio alguno en su tratamiento.

**¿Quiénes son los investigadores?**

El equipo de investigación está formado por un equipo multidisciplinar (medicina, psicología, estadística y evaluación de servicios sanitarios, médicos de familia, enfermeras, cardiólogos) cuyos miembros pertenecen a las siguientes instituciones:

Fundación Avedis Donabedian, Gerencia Asistencial de Atención Primaria (GAAP) del Servicio Madrileño de Salud y Servicio de Evaluación del Servicio Canario de la Salud (SESCS).



Este proyecto ha surgido de una iniciativa colaborativa en el marco de la Red de Investigación en Servicios de Salud en Enfermedades Crónicas (REDISSEC).

## DESCRIPCIÓN GENERAL DEL ESTUDIO

### ¿Por qué se hace este estudio?

Para evaluar la efectividad de una de una Comunidad de Práctica (CdP) virtual dirigida a pacientes con cardiopatía isquémica (CI) para mejorar su conocimiento, habilidades y autoconfianza para gestionar su propia salud y de la asistencia sanitaria que recibe.

### ¿Quién puede participar?

Si usted es mayor de 18 años, tiene cardiopatía isquémica, dispone de internet en su hogar y/o Smartphone.

### Procedimiento del estudio:

Existirán dos grupos de estudio, Grupo de intervención (GI) y Grupo Control (GC), y a los pacientes se les asignará uno u otro al azar. En el caso de que usted quisiera participar en el estudio podría estar en cualquiera de los 2 grupos.

### Si usted desea participar, ¿en qué consiste su participación?

La duración del estudio será de 18 meses. Al comienzo del estudio, a los 6, 12 y 18 meses, los participantes cumplimentarán unos cuestionarios online sobre aspectos relacionados con el nivel de activación de cada participante en las decisiones relacionadas con su salud (cuestionario PAM), el conocimiento de la enfermedad, la actitud hacia la enfermedad, la adherencia a la dieta mediterránea, la actividad física y algunos cuestionarios relacionados con variables psicológicas. Cumplimentar estos cuestionarios le llevará aproximadamente 30 minutos.

Si de forma aleatoria cae en el Grupo de intervención, se le ofrecerá participar durante 18 meses en una Comunidad de Práctica Virtual (CdPv) basada en una plataforma web 2.0. Se pondrá a disposición un enlace (vía email) para registrarse e iniciar la participación voluntaria.

Dentro de esta CdPv usted podrá disponer de elementos educativos, lúdicos y herramientas para facilitar el aprendizaje y la transferencia de conocimientos y de sus actitudes. Además, se trabajarán diversas temáticas relacionadas con: competencias en salud, técnicas de

1  
2  
3 autoeficacia, estilos de vida, aceptación de la enfermedad crónica y toma de decisiones  
4 compartida, dieta, planes de ejercicio, gestión del estrés, etc.  
5  
6

7 Si de forma aleatoria cae en el Grupo Control, usted seguirá los cuidados y atención propias  
8 de la práctica clínica habitual.  
9

## 10 **RIESGOS Y BENEFICIOS DE LA PARTICIPACIÓN EN ESTE ESTUDIO**

11  
12  
13  
14 No se prevé ningún tipo de riesgo físico ni psicológico que pueda ser consecuencia de la  
15 participación en este estudio.  
16

17  
18 El principal beneficio para los pacientes con CI será el contribuir a mejorar su conocimiento,  
19 habilidades y autoconfianza para la gestión de su propia salud y de la asistencia sanitaria.  
20

## 21 **CONFIDENCIALIDAD**

22  
23 El tratamiento, la comunicación y la cesión de los datos de carácter personal de todos los  
24 sujetos participantes se ajustará a lo dispuesto en la Ley Orgánica 3/2018, de 5 de diciembre  
25 de Protección de Datos Personales y garantía de los derechos digitales, y a la aplicación de  
26 del Reglamento (UE) 2016/679 del Parlamento europeo y del Consejo de 27 de abril de 2016  
27 de Protección de Datos (RGPD), por lo que es importante que conozca la siguiente  
28 información:  
29  
30  
31

32 - Además de los derechos que ya conoce (acceso, modificación, oposición y cancelación de  
33 datos) ahora también puede limitar el tratamiento de datos que sean incorrectos, solicitar  
34 una copia o que se trasladen a un tercero (portabilidad) los datos que usted ha facilitado  
35 para el estudio. Para ejercitar sus derechos, diríjase al investigador principal del estudio. Le  
36 recordamos que los datos no se pueden eliminar, aunque deje de participar en el estudio  
37 para garantizar la validez de la investigación y cumplir con los deberes legales y los  
38 requisitos de autorización de medicamentos. Así mismo tiene derecho a dirigirse a la  
39 Agencia de Protección de Datos si no quedara satisfecho/  
40  
41

42 - Tanto el Centro como el Promotor y el Investigador son responsables respectivamente del  
43 tratamiento de sus datos y se comprometen a cumplir con la normativa de protección de  
44 datos en vigor. Los datos recogidos para el estudio estarán identificados mediante un  
45 código, de manera que no se incluya información que pueda identificarle, y sólo su médico  
46 del estudio/colaboradores podrá relacionar dichos datos con usted y con su historia clínica.  
47 Por lo tanto, su identidad no será revelada a ninguna otra persona salvo a las autoridades  
48 sanitarias, cuando así lo requieran o en casos de urgencia médica. Los Comités de Ética de  
49 la Investigación, los representantes de la Autoridad Sanitaria en materia de inspección y el  
50 personal autorizado por el Promotor, únicamente podrán acceder para comprobar los datos  
51  
52  
53  
54  
55  
56  
57  
58  
59  
60

1  
2  
3 personales, los procedimientos del estudio clínico y el cumplimiento de las normas de  
4 buena práctica clínica (siempre manteniendo la confidencialidad de la información).  
5  
6

7 - El Investigador y el Promotor están obligados a conservar los datos recogidos para el  
8 estudio al menos hasta 25 años tras su finalización. Posteriormente, su información  
9 personal solo se conservará por el centro para el cuidado de su salud y por el promotor para  
10 otros fines de investigación científica si usted hubiera otorgado su consentimiento para ello,  
11 y si así lo permite la ley y requisitos éticos aplicables.  
12  
13  
14

### 15 **INFORMACIÓN ADICIONAL**

16  
17  
18 Tal y como exige la ley, para participar deberá firmar y fechar el documento de  
19 consentimiento informado.  
20  
21

22  
23 **COORDINADORA DEL PROYECTO (CATALUÑA):**

24 Dra. Carola Orrego, Fundación Avedis Donabedian

25 Contacto: [corrego@fadq.org](mailto:corrego@fadq.org)  
26  
27

28 **INVESTIGADORA PRINCIPAL (MADRID):**

29 Ana Isabel González González, Centro de Salud Vicente Muzas, Gerencia Asistencial de  
30 Atención Primaria. Servicio Madrileño de Salud

31 Contacto: [aisabel.gonzalezg@salud.madrid.org](mailto:aisabel.gonzalezg@salud.madrid.org)  
32  
33

34  
35 **INVESTIGADORA PRINCIPAL (CANARIAS):**

36 Lilisbeth Perestelo Pérez, Servicio de Evaluación del Servicio Canario de la Salud

37 Contacto: [lperperr@gobiernodecanarias.org](mailto:lperperr@gobiernodecanarias.org)  
38  
39  
40  
41  
42  
43  
44  
45  
46  
47  
48  
49  
50  
51  
52  
53  
54  
55  
56  
57  
58  
59  
60

**CONSENTIMIENTO INFORMADO PARA PACIENTES**

Yo (nombre y apellidos)

.....

He leído la hoja de información que se me ha entregado.

He podido hacer preguntas sobre el estudio.

He recibido suficiente información sobre el estudio.

He hablado con:

.....

Comprendo que mi participación es voluntaria.

Comprendo que puedo retirarme del estudio:

1º Cuando quiera

2º Sin tener que dar explicaciones.

3º Sin que esto repercuta en mis cuidados médicos.

- Presto libremente mi conformidad para participar en el estudio y doy mi consentimiento para el acceso y utilización de mis datos en las condiciones detalladas en la hoja de información.

**Nombre del participante:**

**Nombre del investigador:**

**Fecha:**

**Fecha:**

**Firma:**

**Firma:**

1  
2  
3  
4  
5  
6  
7  
8  
9  
10  
11  
12  
13  
14  
15  
16  
17  
18  
19  
20  
21  
22  
23  
24  
25  
26  
27  
28  
29  
30  
31  
32  
33  
34  
35  
36  
37  
38  
39  
40  
41  
42  
43  
44  
45  
46  
47  
48  
49  
50  
51  
52  
53  
54  
55  
56  
57  
58  
59  
60

For peer review only
