# Supplementary material for: Effectiveness and cost-effectiveness of a virtual community of practice to improve the empowerment of patients with ischaemic heart disease: study protocol of a randomised controlled trial
Source: PubMed Central journal article supplement — BMJ Open. 2020 Oct 12;10(10):e037374. doi: 10.1136/bmjopen-2020-037374 (PMC7552830; doi:10.1136/bmjopen-2020-037374), 2020-10-12
Supplement: bmjopen-2020-037374supp002.pdf [file bmjopen-2020-037374supp002.pdf]

**Additional file 2. Informed consent****HOJA DE INFORMACIÓN AL PACIENTE****FASE ENSAYO CLÍNICO****INTRODUCCIÓN**

Estimado/a Sr/a:

Le comunicamos que se está desarrollando la puesta en marcha del ensayo clínico denominado **“Efectividad y coste-efectividad de una intervención virtual (Comunidad de Práctica) para la mejora del empoderamiento de pacientes con cardiopatía isquémica en atención primaria: ensayo controlado aleatorizado por conglomerados” (Cataluña: PI18/01404/, Madrid: PI18/01397, Canarias: PI18/01333).**

Este estudio ha sido aprobado por los Comités Éticos de los centros participantes de acuerdo con la legislación vigente, la Ley Orgánica 3/2018, de 5 de diciembre de Protección de Datos Personales y garantía de los derechos digitales, y a la aplicación del Reglamento (UE) 2016/679 del Parlamento europeo y del Consejo de 27 de abril de 2016 de Protección de Datos (RGPD) por el que se regula este tipo de estudios.

Nuestra intención es tan solo que usted reciba la información correcta y suficiente para que pueda evaluar y juzgar si quiere o no participar en este estudio. Para ello lea esta hoja informativa con atención y nosotros le aclararemos las dudas que le puedan surgir después de la explicación. Además, puede consultar con las personas que considere oportuno.

**PARTICIPACIÓN VOLUNTARIA**

Debe saber que su participación en este estudio es voluntaria y que puede decidir no participar o cambiar su decisión y retirar el consentimiento en cualquier momento, sin que por ello se altere la relación con su médico ni se produzca perjuicio alguno en su tratamiento.

**¿Quiénes son los investigadores?**

El equipo de investigación está formado por un equipo multidisciplinar (medicina, psicología, estadística y evaluación de servicios sanitarios, médicos de familia, enfermeras, cardiólogos) cuyos miembros pertenecen a las siguientes instituciones:

Fundación Avedis Donabedian, Gerencia Asistencial de Atención Primaria (GAAP) del Servicio Madrileño de Salud y Servicio de Evaluación del Servicio Canario de la Salud (SESCS).

Este proyecto ha surgido de una iniciativa colaborativa en el marco de la Red de Investigación en Servicios de Salud en Enfermedades Crónicas (REDISSEC).

## **DESCRIPCIÓN GENERAL DEL ESTUDIO**

### **¿Por qué se hace este estudio?**

Para evaluar la efectividad de una de una Comunidad de Práctica (CdP) virtual dirigida a pacientes con cardiopatía isquémica (CI) para mejorar su conocimiento, habilidades y autoconfianza para gestionar su propia salud y de la asistencia sanitaria que recibe.

### **¿Quién puede participar?**

Si usted es mayor de 18 años, tiene cardiopatía isquémica, dispone de internet en su hogar y/o Smartphone.

### **Procedimiento del estudio:**

Existirán dos grupos de estudio, Grupo de intervención (GI) y Grupo Control (GC), y a los pacientes se les asignará uno u otro al azar. En el caso de que usted quisiera participar en el estudio podría estar en cualquiera de los 2 grupos.

### **Si usted desea participar, ¿en qué consiste su participación?**

La duración del estudio será de 18 meses. Al comienzo del estudio, a los 6, 12 y 18 meses, los participantes cumplimentarán unos cuestionarios online sobre aspectos relacionados con el nivel de activación de cada participante en las decisiones relacionadas con su salud (cuestionario PAM), el conocimiento de la enfermedad, la actitud hacia la enfermedad, la adherencia a la dieta mediterránea, la actividad física y algunos cuestionarios relacionados con variables psicológicas. Cumplimentar estos cuestionarios le llevará aproximadamente 30 minutos.

Si de forma aleatoria cae en el Grupo de intervención, se le ofrecerá participar durante 18 meses en una Comunidad de Práctica Virtual (CdPv) basada en una plataforma web 2.0. Se pondrá a disposición un enlace (vía email) para registrarse e iniciar la participación voluntaria.

Dentro de esta CdPv usted podrá disponer de elementos educativos, lúdicos y herramientas para facilitar el aprendizaje y la transferencia de conocimientos y de sus actitudes. Además, se trabajarán diversas temáticas relacionadas con: competencias en salud, técnicas de

autoeficacia, estilos de vida, aceptación de la enfermedad crónica y toma de decisiones compartida, dieta, planes de ejercicio, gestión del estrés, etc.

Si de forma aleatoria cae en el Grupo Control, usted seguirá los cuidados y atención propias de la práctica clínica habitual.

### **RIESGOS Y BENEFICIOS DE LA PARTICIPACIÓN EN ESTE ESTUDIO**

No se prevé ningún tipo de riesgo físico ni psicológico que pueda ser consecuencia de la participación en este estudio.

El principal beneficio para los pacientes con CI será el contribuir a mejorar su conocimiento, habilidades y autoconfianza para la gestión de su propia salud y de la asistencia sanitaria.

### **CONFIDENCIALIDAD**

El tratamiento, la comunicación y la cesión de los datos de carácter personal de todos los sujetos participantes se ajustará a lo dispuesto en la Ley Orgánica 3/2018, de 5 de diciembre de Protección de Datos Personales y garantía de los derechos digitales, y a la aplicación de del Reglamento (UE) 2016/679 del Parlamento europeo y del Consejo de 27 de abril de 2016 de Protección de Datos (RGPD), por lo que es importante que conozca la siguiente información:

- Además de los derechos que ya conoce (acceso, modificación, oposición y cancelación de datos) ahora también puede limitar el tratamiento de datos que sean incorrectos, solicitar una copia o que se trasladen a un tercero (portabilidad) los datos que usted ha facilitado para el estudio. Para ejercitar sus derechos, diríjase al investigador principal del estudio. Le recordamos que los datos no se pueden eliminar, aunque deje de participar en el estudio para garantizar la validez de la investigación y cumplir con los deberes legales y los requisitos de autorización de medicamentos. Así mismo tiene derecho a dirigirse a la Agencia de Protección de Datos si no quedara satisfecho/

- Tanto el Centro como el Promotor y el Investigador son responsables respectivamente del tratamiento de sus datos y se comprometen a cumplir con la normativa de protección de datos en vigor. Los datos recogidos para el estudio estarán identificados mediante un código, de manera que no se incluya información que pueda identificarle, y sólo su médico del estudio/colaboradores podrá relacionar dichos datos con usted y con su historia clínica. Por lo tanto, su identidad no será revelada a ninguna otra persona salvo a las autoridades sanitarias, cuando así lo requieran o en casos de urgencia médica. Los Comités de Ética de la Investigación, los representantes de la Autoridad Sanitaria en materia de inspección y el personal autorizado por el Promotor, únicamente podrán acceder para comprobar los datos

personales, los procedimientos del estudio clínico y el cumplimiento de las normas de buena práctica clínica (siempre manteniendo la confidencialidad de la información).

- El Investigador y el Promotor están obligados a conservar los datos recogidos para el estudio al menos hasta 25 años tras su finalización. Posteriormente, su información personal solo se conservará por el centro para el cuidado de su salud y por el promotor para otros fines de investigación científica si usted hubiera otorgado su consentimiento para ello, y si así lo permite la ley y requisitos éticos aplicables.

### **INFORMACIÓN ADICIONAL**

Tal y como exige la ley, para participar deberá firmar y fechar el documento de consentimiento informado.

**COORDINADORA DEL PROYECTO (CATALUÑA):**

Dra. Carola Orrego, Fundación Avedis Donabedian

Contacto: [corrego@fadq.org](mailto:corrego@fadq.org)

**INVESTIGADORA PRINCIPAL (MADRID):**

Ana Isabel González González, Centro de Salud Vicente Muzas, Gerencia Asistencial de Atención Primaria. Servicio Madrileño de Salud

Contacto: [aisabel.gonzalezg@salud.madrid.org](mailto:aisabel.gonzalezg@salud.madrid.org)

**INVESTIGADORA PRINCIPAL (CANARIAS):**

Lilisbeth Perestelo Pérez, Servicio de Evaluación del Servicio Canario de la Salud

Contacto: [lperperr@gobiernodecanarias.org](mailto:lperperr@gobiernodecanarias.org)

**CONSENTIMIENTO INFORMADO PARA PACIENTES**

Yo (nombre y apellidos)

.....

He leído la hoja de información que se me ha entregado.

He podido hacer preguntas sobre el estudio.

He recibido suficiente información sobre el estudio.

He hablado con:

.....

Comprendo que mi participación es voluntaria.

Comprendo que puedo retirarme del estudio:

1º Cuando quiera

2º Sin tener que dar explicaciones.

3º Sin que esto repercuta en mis cuidados médicos.

- Presto libremente mi conformidad para participar en el estudio y doy mi consentimiento para el acceso y utilización de mis datos en las condiciones detalladas en la hoja de información.

**Nombre del participante:**

**Nombre del investigador:**

**Fecha:**

**Fecha:**

**Firma:**

**Firma:**
